# Supplementary material for: Chemoproteomic profiling of itaconations in Salmonella
Source: Royal Society of Chemistry journal article supplement (doi:10.1039/d1sc00660f), 2021-01-01
Supplement: d1sc00660f2.xlsx [file d1sc00660f2.xlsx]

## Sheet: Sheet1
			Enrichment Ratio (M/L)					Competition Ratio (M/H)
Uniprot id	description	symbol	Rep.1	Rep.2	Rep.3	Rep.4	Average	Rep.1	Rep.2	Rep.3	Rep.4	Average
P51066	aceA Isocitrate lyase	aceA	15	15	15	15	15	15	15	15	15	15
Q8ZM59	STM3082 Putative zinc-binding dehydrogenase	STM3082	15	15	11.11	15	14.03	1.41	1.11	1.09	15	4.65
Q8ZJV7	deoD Purine nucleoside phosphorylase DeoD-type	deoD	15	15	15	15	15	7.69	6.67	1.96	1.79	4.53
Q8ZKP9	lsrG (4S)-4-hydroxy-5-phosphonooxypentane-2,3-dione iso	lsrG	15	15	15	15	15	6.25	5.56	3.03	3.03	4.47
P0A1F6	udp Uridine phosphorylase	udp	15	15	10	12	13	4.81	4.14	3.05	2.37	3.59
Q8ZPZ0	icdA Isocitrate dehydrogenase [NADP]	icdA	15	15	15	15	15	4.25	4.45	2.47	2.43	3.4
P65599	orn Oligoribonuclease	orn	15	15	15	15	15	3.7	3.85	4	3.85	3.85
P0A1G5	dksA RNA polymerase-binding transcription factor DksA	dksA	15	15	15	12.5	14.38	3.57	3.45	3.85	4	3.72
Q7CPA1	aspA Aspartate ammonia-lyase	aspA	15	15	12.5	15	14.38	5.26	5	1.56	1.56	3.35
Q7CPD4	pepQ Xaa-Pro dipeptidase	pepQ	15	15	15	15	15	4.76	5	1.75	1.75	3.32
P65748	ppa Inorganic pyrophosphatase	ppa	15	15	10	15	13.75	4.17	5.26	1.52	1.82	3.19
P55900	serC Phosphoserine aminotransferase	serC	15	15	15	15	15	5	4.76	1.54	1.39	3.17
O85140	fabD Malonyl CoA-acyl carrier protein transacylase	fabD	15	15	15	15	15	3.57	3.03	3.33	2.38	3.08
Q8ZQZ2	ybeL Putative cytoplasmic protein	ybeL	15	15	15	15	15	3.45	3.23	2.86	2.5	3.01
Q7CPS3	ygiN Putative cytoplasmic protein	ygiN	15	15	15	15	15	4.17	3.13	2.17	2.27	2.93
Q8ZN45	sseA Sulfurtransferase	sseA	15	15	15	15	15	4.17	4	1.67	1.69	2.88
Q7CPT2	STM3136 Putative D-mannonate oxidoreductase	STM3136	15	15	15	15	15	3.85	3.57	1.92	2	2.84
Q7CQ13	fdx [2FE-2S] ferredoxin	fdx	15	15	15	15	15	2.17	2.22	3.45	3.45	2.82
Q8ZQR4	pgl 6-phosphogluconolactonase	pgl	15	15	15	15	15	3.13	2.86	2.56	2.33	2.72
Q7CQT1	STM1078 Putative cytoplasmic protein	STM1078	15	11.11	15	15	14.03	3.45	3.23	1.96	2.08	2.68
Q8ZR92	ybbN Putative thioredoxin protein	ybbN	15	15	12.5	15	14.38	3.23	4.35	1.35	1.33	2.56
P74840	prpD 2-methylcitrate dehydratase	prpD	15	15	15	15	15	3.23	3.57	1.82	1.64	2.56
P67179	yebC Probable transcriptional regulatory protein YebC	yebC	15	15	15	15	15	3.57	3.33	1.61	1.64	2.54
P63923	deoB Phosphopentomutase	deoB	15	15	11.11	15	14.03	3.13	3.03	2.17	1.82	2.54
Q8ZRT2	aceE Pyruvate dehydrogenase E1 component	aceE	15	15	11.11	15	14.03	3.03	3.45	1.79	1.85	2.53
Q7CPH3	yicC Putative stress-induced protein	yicC	12.5	11.11	15	12.5	12.78	3.45	4.35	1.09	1.11	2.5
Q7CPQ5	yhbO Putative intracellular proteinase	yhbO	15	15	15	12.5	14.38	3.33	3.33	1.64	1.64	2.49
Q8ZQY4	rihA Pyrimidine-specific ribonucleoside hydrolase RihA	rihA	15	15	15	15	15	3.45	3.13	1.56	1.54	2.42
P67617	yggX Probable Fe(2+)-trafficking protein	yggX	15	15	15	15	15	2.38	2.38	2.5	2.33	2.4
P06196	ushA Silent protein UshA(0)	ushA	12.5	15	15	15	14.38	3.57	3.57	1.28	1.14	2.39
Q8ZRX8	dapB 4-hydroxy-tetrahydrodipicolinate reductase	dapB	15	15	15	15	15	1.82	1.67	3.13	2.78	2.35
Q8ZKW8	atpG ATP synthase gamma chain	atpG	15	15	15	15	15	2.78	2.86	1.89	1.79	2.33
P0A1H3	fusA Elongation factor G	fusA	15	15	15	15	15	3.13	3.23	1.52	1.43	2.32
Q7CPE1	atpA ATP synthase subunit alpha	atpA	15	15	15	15	15	2.63	2.86	1.92	1.85	2.32
P05989	ilvC Ketol-acid reductoisomerase (NADP(+))	ilvC	15	15	15	15	15	3.13	3.57	1.3	1.25	2.31
Q8ZKX9	yieF Putative oxidoreductase	yieF	15	15	15	15	15	2.63	4	1.28	1.28	2.3
Q8ZKI4	pgi Glucose-6-phosphate isomerase	pgi	15	15	15	15	15	2.94	3.33	1.43	1.47	2.29
Q7CPL0	STM3461 Putative cytoplasmic protein	STM3461	15	12.5	15	15	14.38	1.75	1.69	3.13	2.56	2.28
Q8ZM78	bglA 6-phospho-beta-glucosidase A	bglA	15	15	15	15	15	3.13	3.03	1.56	1.39	2.28
Q8ZL56	gpmI 2,3-bisphosphoglycerate-independent phosphoglycera	gpmI	15	15	10	11.11	12.78	2.78	2.78	1.75	1.75	2.27
P0A6B1	acpP Acyl carrier protein	acpP	15	15	15	15	15	2.08	2.38	2.27	2.27	2.25
Q8ZPI8	ydfI Putative mannitol dehydrogenase	ydfI	15	15	15	15	15	3.57	2.86	1.3	1.25	2.24
Q8ZJV8	deoC Deoxyribose-phosphate aldolase	deoC	15	15	15	15	15	1.79	1.96	2.5	2.63	2.22
P64076	eno Enolase	eno	12.5	15	15	15	14.38	1.52	1.56	3.03	2.7	2.2
Q8ZK35	arcB Ornithine carbamoyltransferase, catabolic	arcB	15	15	15	15	15	3.23	3.03	1.11	1.25	2.15
Q8ZQ11	ycfH Putative metal-dependent hydrolase	ycfH	15	15	15	15	15	2.94	2.78	1.47	1.41	2.15
Q8ZR68	cysS Cysteine--tRNA ligase	cysS	15	15	15	15	15	2.86	2.86	1.39	1.45	2.14
Q8ZQB3	ycbL Putative metallo-beta-lactamase	ycbL	15	15	5	15	12.5	2.33	2.5	2.27	1.41	2.13
P0A1S2	hns DNA-binding protein H-NS	hns	15	15	15	15	15	2.27	2.08	1.82	2.33	2.12
P37449	pduB Propanediol utilization protein PduB	pduB	15	15	15	15	15	1.69	1.67	2.5	2.56	2.11
P00499	hisG ATP phosphoribosyltransferase	hisG	15	15	15	15	15	2.5	2.27	2.13	1.43	2.08
Q8ZQX8	nagA N-acetylglucosamine-6-phosphate deacetylase	nagA	15	15	15	15	15	2.78	2.5	1.56	1.43	2.07
P0A1A5	ilvE Branched-chain-amino-acid aminotransferase	ilvE	15	15	15	15	15	1.28	1.35	2.86	2.78	2.07
P22714	galT Galactose-1-phosphate uridylyltransferase	galT	15	15	15	15	15	2.56	2.63	1.64	1.41	2.06
Q8ZM63	tktA Transketolase	tktA	15	15	15	15	15	2.5	2.38	1.64	1.64	2.04
P41033	pckA Phosphoenolpyruvate carboxykinase (ATP)	pckA	15	15	15	15	15	2.7	2.86	1.25	1.3	2.03
Q8ZKL4	aceB Malate synthase	aceB	15	15	15	15	15	2.38	2.38	1.69	1.64	2.02
O68901	sodC Superoxide dismutase [Cu-Zn] 2	sodC	12	15	15	15	14.25	2.56	2.78	1.28	1.47	2.02
P0A1E3	cysK Cysteine synthase A	cysK	12.5	11.11	15	15	13.4	1.35	1.47	2.78	2.44	2.01
Q8ZRM2	gloB Hydroxyacylglutathione hydrolase	gloB	15	15	15	15	15	2.78	2.44	1.37	1.41	2
Q8ZLM9	yrdD Putative DNA topoisomerase	yrdD	15	15	15	15	15	2.04	1.72	2.22	1.92	1.98
Q8ZQ76	pepN Aminopeptidase N	pepN	15	15	15	15	15	2.22	2.27	1.64	1.75	1.97
Q8ZNS0	amn AMP nucleosidase	amn	15	15	15	15	15	2.56	2.63	1.32	1.35	1.97
P25081	manA Mannose-6-phosphate isomerase	manA	15	15	11.11	15	14.03	2.56	2.44	1.39	1.45	1.96
Q8ZMK0	srlD Glucitol (Sorbitol)-6-phosphate dehydrogenase	srlD	15	15	15	15	15	1.39	1.39	2.78	2.27	1.96
Q8ZQW9	pgm Phosphoglucomutase	pgm	15	15	11.11	15	14.03	2.33	2.33	1.67	1.43	1.94
Q7CQ41	accD Acetyl-coenzyme A carboxylase carboxyl transferase	accD	15	15	15	15	15	2.38	2.5	1.56	1.3	1.94
Q7CPE2	atpD ATP synthase subunit beta	atpD	10	11.11	12	14	11.78	2.27	2.38	1.49	1.56	1.93
Q8ZNM0	cdd Cytidine deaminase	cdd	15	12.5	15	15	14.38	2.08	2	2	1.59	1.92
Q8ZPB1	STM1624 Putative cytoplasmic protein	STM1624	15	15	15	15	15	2.44	2.33	1.43	1.47	1.92
P26311	pepT Peptidase T	pepT	12.5	15	15	15	14.38	2.38	2.5	1.37	1.41	1.91
Q7CQK9	ydhD Glutaredoxin	ydhD	15	15	15	15	15	2.44	2.27	1.43	1.49	1.91
Q8ZP84	uspE Universal stress protein E	uspE	15	15	15	15	15	1.79	1.89	1.89	2	1.89
Q8ZLK4	rpe Ribulose-phosphate 3-epimerase	rpe	15	15	12	10	13	2.5	2.38	1.43	1.23	1.89
Q8XFG8	ppiB Peptidyl-prolyl cis-trans isomerase	ppiB	11.11	11.11	15	15	13.06	1.75	1.96	1.82	2	1.88
Q7CQR9	ycdX Probable phosphatase YcdX	ycdX	15	12.5	15	15	14.38	2.17	2.13	1.75	1.45	1.88
P0A2L1	yjbQ UPF0047 protein YjbQ	yjbQ	15	15	15	15	15	2.27	2.22	1.49	1.49	1.87
O68446	purR HTH-type transcriptional repressor PurR	purR	15	10	15	12.5	13.13	1.61	1.54	2.17	2.13	1.86
Q8ZRS3	speE Polyamine aminopropyltransferase	speE	15	15	15	15	15	2.5	2.17	1.39	1.39	1.86
Q8ZLA1	ghrB Glyoxylate/hydroxypyruvate reductase B	ghrB	15	15	15	15	15	2.22	2.17	1.41	1.54	1.84
Q8ZLW8	yqjG Putative glutathione S-transferase	yqjG	15	15	12.5	15	14.38	2.27	2.38	1.32	1.37	1.83
P26394	rfbC dTDP-4-dehydrorhamnose 3,5-epimerase	rfbC	15	15	15	15	15	2.27	2.04	1.43	1.54	1.82
P0A7Z7	rpoA DNA-directed RNA polymerase subunit alpha	rpoA	15	15	15	15	15	1.56	1.52	2.17	2	1.81
Q8ZKV4	hemY Protein for a late step of protoheme IX synthesis	hemY	15	10	15	13	13.25	2.04	1.75	1.37	2.08	1.81
Q9L6Q5	hemY 96% identity with E. coli hemY protein (HEMY) (SP:	hemY	15	10	12	14	12.75	2.04	1.75	1.37	2.08	1.81
Q8ZLG2	yhhX Putative oxidoreductase	yhhX	15	15	15	15	15	1.33	1.32	2.38	2.17	1.8
Q8ZPT5	pfkB Phosphofructokinase	pfkB	15	15	15	15	15	1.67	1.61	2	1.92	1.8
Q8ZNT7	dcyD D-cysteine desulfhydrase	dcyD	15	15	15	15	15	2.13	2	1.32	1.75	1.8
Q7CQ01	clpB Chaperone protein ClpB	clpB	15	15	12.5	15	14.38	1.33	1.41	2.27	2.17	1.8
Q8ZRS1	gcd Glucose dehydrogenase	gcd	15	15	15	15	15	2.44	2.56	1.1	1.02	1.78
Q7CQ11	nifU Iron-sulfur cluster assembly scaffold protein IscU	nifU	15	15	15	15	15	1.67	2.13	1.85	1.47	1.78
P0A1C3	accA Acetyl-coenzyme A carboxylase carboxyl transferase	accA	15	15	10	15	13.75	1.92	2.38	1.49	1.32	1.78
P0A2H9	dsbA Thiol:disulfide interchange protein DsbA	dsbA	15	15	15	15	15	2	1.89	1.54	1.67	1.77
P63223	gmhA Phosphoheptose isomerase	gmhA	12.5	15	11.11	15	13.4	2.27	2.08	1.45	1.28	1.77
P0A1Y8	nuoE NADH-quinone oxidoreductase subunit E	nuoE	15	15	15	15	15	2.22	2.04	1.43	1.39	1.77
Q7CQ05	grcA Autonomous glycyl radical cofactor	grcA	15	12.5	15	15	14.38	1.75	1.69	1.82	1.75	1.76
Q7CQR2	yceH UPF0502 protein YceH	yceH	15	15	15	15	15	1.41	1.43	2.17	2	1.75
Q93IN1	bcsB Cyclic di-GMP-binding protein	bcsB	15	15	15	15	15	2.22	2.5	1.12	1.16	1.75
Q8ZRZ0	ileS Isoleucine--tRNA ligase	ileS	15	15	15	15	15	1.43	1.52	2.13	1.92	1.75
Q8ZPV9	yeaD Putative glucose-6-phosphate 1-epimerase	yeaD	15	15	15	15	15	1.72	1.72	1.79	1.75	1.75
P56978	cyaY Iron-sulfur cluster assembly protein CyaY	cyaY	15	15	15	15	15	2	2.08	1.52	1.37	1.74
P65359	minC Septum site-determining protein MinC	minC	15	15	15	15	15	2.27	1.89	1.49	1.32	1.74
P64052	tsf Elongation factor Ts	tsf	15	15	10	10	12.5	1.92	2.38	1.23	1.43	1.74
Q8ZLQ9	yhcH Putative cytoplasmic protein	yhcH	15	10	15	13	13.25	2.08	2.33	1.16	1.3	1.72
Q8ZPT7	yniC Putative enzyme	yniC	15	15	15	15	15	1.92	1.67	1.67	1.61	1.72
P65226	thrB Homoserine kinase	thrB	15	15	15	10	13.75	1.64	1.56	2	1.67	1.72
Q8ZJY7	mrr Restriction of methylated adenine	mrr	15	15	15	15	15	1.69	2.94	1.16	1.05	1.71
Q7CQF3	tdk Thymidine kinase	tdk	15	15	15	15	15	2.08	2	1.47	1.28	1.71
Q8ZQX7	nagB Glucosamine-6-phosphate deaminase	nagB	15	15	10	10	12.5	2.22	2.22	1.22	1.14	1.7
P0A2I1	topA DNA topoisomerase 1	topA	15	15	15	15	15	1.82	2	1.52	1.45	1.7
Q8ZR71	purK N5-carboxyaminoimidazole ribonucleotide synthase	purK	15	11.11	15	15	14.03	1.85	2.27	1.32	1.32	1.69
Q8ZLK9	yhfA Putative inner membrane protein	yhfA	15	15	15	11.11	14.03	1.79	1.61	1.96	1.37	1.68
Q8ZKG0	STM4270 Putative LysR family transcriptional regulator	STM4270	15	15	15	15	15	2.13	2.04	1.32	1.22	1.68
Q8ZP52	acnA Aconitate hydratase A	acnA	11.11	12.5	12.5	12.5	12.15	1.85	2.08	1.33	1.43	1.67
P58661	aspC Aspartate aminotransferase	aspC	10	15	15	14	13.5	1.75	1.92	1.45	1.56	1.67
P40861	proA Gamma-glutamyl phosphate reductase	proA	15	15	15	15	15	1.96	1.75	1.47	1.47	1.66
P64105	fabA 3-hydroxydecanoyl-[acyl-carrier-protein] dehydrata	fabA	10	11.11	13.4	15	12.37	2.04	2.13	1.22	1.27	1.66
Q8ZRA6	acrA Acridine efflux pump	acrA	12.5	15	14	15	14.13	1.72	1.69	1.69	1.54	1.66
Q8ZRD3	nusB Transcription antitermination protein NusB	nusB	15	15	15	15	15	2.17	2.13	1.1	1.25	1.66
P0A283	crr PTS system glucose-specific EIIA component	crr	10	15	11.11	15	12.78	1.59	2.13	1.39	1.54	1.66
Q7CPD3	yihD Putative cytoplasmic protein	yihD	15	15	15	15	15	2.27	1.67	1.27	1.43	1.66
P37419	kbl 2-amino-3-ketobutyrate coenzyme A ligase	kbl	15	15	15	15	15	2	2.04	1.33	1.22	1.65
Q7CQ23	bcp Thioredoxin dependent thiol peroxidase	bcp	15	15	15	15	15	1.89	1.79	1.59	1.33	1.65
Q8ZN68	yfgD Arsenate reductase	yfgD	15	15	15	15	15	1.47	1.52	1.82	1.75	1.64
Q7CPU6	fba Fructose-bisphosphate aldolase	fba	15	15	12.5	15	14.38	2	1.92	1.33	1.3	1.64
Q8ZK57	iolG Inositol 2-dehydrogenase	iolG	11.11	14	10	15	12.53	1.72	1.82	1.28	1.72	1.64
Q7CQP2	celA PTS family sugar specific enzyme IIB for cellobios	celA	15	15	15	12.5	14.38	1.79	1.69	1.54	1.52	1.63
Q8ZN60	guaA GMP synthase [glutamine-hydrolyzing]	guaA	15	15	15	15	15	2	1.96	1.28	1.28	1.63
P10367	hisI Histidine biosynthesis bifunctional protein HisIE	hisI	15	15	15	15	15	2	2.04	1.35	1.12	1.63
Q7CQV7	ybiS Putative periplasmic protein	ybiS	12.5	12.5	15	15	13.75	2.04	1.85	1.33	1.28	1.63
Q8ZLD7	uspA Universal stress protein A	uspA	12.5	15	15	15	14.38	1.92	1.67	1.25	1.67	1.63
P0CL43	invH Invasion lipoprotein invH	invH	15	15	15	15	15	2.27	2.17	0.95	1.1	1.62
Q8ZL72	aldB Aldehyde dehydrogenase B	aldB	15	15	15	15	15	1.52	1.43	1.82	1.72	1.62
Q8ZKB1	psd Phosphatidylserine decarboxylase proenzyme	psd	15	15	15	15	15	1.89	2	1.28	1.32	1.62
P0A1P0	gapA Glyceraldehyde-3-phosphate dehydrogenase	gapA	15	15	15	15	15	1.67	1.72	1.61	1.47	1.62
Q8ZM06	dkgA 2,5-diketo-D-gluconic acid reductase A	dkgA	15	15	15	15	15	1.75	2	1.32	1.39	1.61
P65363	minE Cell division topological specificity factor	minE	12.5	11.11	15	15	13.4	1.75	1.67	1.56	1.47	1.61
Q8ZL61	lldD L-lactate dehydrogenase	lldD	15	15	15	10	13.75	1.96	1.92	1.32	1.25	1.61
P67091	uspF Universal stress protein F	uspF	15	15	15	15	15	1.92	1.92	1.28	1.32	1.61
Q7CR64	yaeH UPF0325 protein YaeH	yaeH	12.5	13	10	15	12.63	1.72	1.72	1.52	1.47	1.61
P0A2R4	rpoC DNA-directed RNA polymerase subunit beta	rpoC	15	15	15	15	15	1.41	1.52	1.79	1.72	1.61
Q8ZLF5	ugpQ Cytosolic glycerophosphodiester phosphodiesterase	ugpQ	15	15	15	15	15	1.92	1.92	1.33	1.25	1.61
P0A1Q2	gloA Lactoylglutathione lyase	gloA	15	15	15	15	15	1.72	1.35	1.79	1.56	1.61
Q8ZRS6	yacL UPF0231 protein YacL	yacL	7.14	15	15	15	13.04	1.32	1.41	2.13	1.56	1.6
P0AA19	ompR Transcriptional regulatory protein OmpR	ompR	15	15	15	15	15	1.79	1.89	1.37	1.37	1.6
Q8ZNM1	STM2178 Putative 1,2-dioxygenase protein	STM2178	15	15	15	6.25	12.81	1.85	2.08	1.23	1.22	1.6
Q8ZKX0	glmU Bifunctional protein GlmU	glmU	15	15	15	15	15	1.89	1.85	1.35	1.3	1.6
H9L462	STM1731 Putative catalase	STM1731	12.5	10	15	15	13.13	1.72	1.75	1.52	1.39	1.6
P65702	pgk Phosphoglycerate kinase	pgk	15	15	15	15	15	1.45	1.54	1.69	1.69	1.59
Q8ZLD0	STM3601 Putative phosphosugar isomerase	STM3601	15	15	15	15	15	1.79	2.17	1.25	1.16	1.59
Q8ZPI7	ydeJ Putative competence-damaged protein	ydeJ	15	12.5	15	15	14.38	1.61	2.13	1.39	1.23	1.59
Q7CQT9	rpsA 30S ribosomal protein S1	rpsA	15	15	15	15	15	1.23	1.22	1.82	2.08	1.59
Q8ZNP8	baeR Response regulator in two-component regulatory sys	baeR	15	15	15	15	15	1.96	1.82	1.35	1.22	1.59
B5EZU5	SeAg_B4198 Dienelactone hydrolase	SeAg_B4198	15	15	15	15	15	1.75	1.89	1.25	1.45	1.59
C0Q3D8	ysgA Putative hydrolase	ysgA	15	15	15	15	15	1.75	1.89	1.25	1.45	1.59
E8XJF6	dlhH Dienelactone hydrolase	dlhH	15	15	15	15	15	1.75	1.89	1.25	1.45	1.59
Q57HP1	dlhH Putative dienelactone hydrolase family	dlhH	15	15	15	15	15	1.75	1.89	1.25	1.45	1.59
Q9L6M9	ysgA Putative carboxymethylenebutenolidase	ysgA	15	15	15	15	15	1.75	1.89	1.25	1.45	1.59
P0A1P8	grxA Glutaredoxin 1	grxA	15	10	15	15	13.75	2.17	1.72	1.39	1.04	1.58
P26978	purH Bifunctional purine biosynthesis protein PurH	purH	15	15	15	15	15	2	2.08	1.12	1.11	1.58
Q8ZR95	copA Copper-exporting P-type ATPase	copA	15	11.11	15	15	14.03	1.43	1.43	1.72	1.72	1.58
Q8ZQ30	ghrA Glyoxylate/hydroxypyruvate reductase A	ghrA	15	15	15	15	15	1.79	1.82	1.3	1.39	1.57
P10368	hisB Histidine biosynthesis bifunctional protein HisB	hisB	15	15	15	15	15	2.08	2	1.28	0.93	1.57
Q8ZK81	rpsR 30S ribosomal protein S18	rpsR	15	15	15	15	15	1.72	1.75	1.47	1.33	1.57
Q7CQI9	adhP Alcohol dehydrogenase	adhP	15	15	15	15	15	1.61	1.59	1.56	1.52	1.57
Q8ZM07	yqhD Putative alcohol dehydrogenase	yqhD	15	15	15	15	15	1.33	1.25	1.82	1.85	1.56
P10370	hisD Histidinol dehydrogenase	hisD	12.5	11.11	10	15	12.15	1.89	1.85	1.39	1.08	1.55
P10369	hisC Histidinol-phosphate aminotransferase	hisC	15	15	15	15	15	2.08	1.96	1.22	0.93	1.55
Q8ZL01	yidR Putative cytoplasmic protein	yidR	12.5	15	15	8.33	12.71	1.96	1.69	1.32	1.2	1.54
Q8ZMD6	STM2963 Putative MFS superfamily D-glucarate permease	STM2963	15	15	15	15	15	1.52	1.37	1.56	1.72	1.54
P66032	ribB 3,4-dihydroxy-2-butanone 4-phosphate synthase	ribB	11.11	15	15	15	14.03	1.85	2.08	1.16	1.06	1.54
Q8ZRE7	ppnP Pyrimidine/purine nucleoside phosphorylase	ppnP	11.11	11.11	15	15	13.06	1.89	1.82	1.23	1.22	1.54
Q8ZQ69	lonH Endopeptidase La	lonH	15	15	15	15	15	1.75	2.27	1.1	1.03	1.54
Q8ZKG5	STM4262 Putative ABC-type bacteriocin/lantibiotic exporter	STM4262	15	15	15	15	15	1.96	1.75	1.25	1.19	1.54
Q7CR61	rcsF Outer membrane lipoprotein RcsF	rcsF	15	12.5	15	15	14.38	1.25	1.27	2.38	1.25	1.54
Q8ZRF0	proC Pyrroline-5-carboxylate reductase	proC	15	12.5	15	15	14.38	1.67	1.92	1.35	1.19	1.53
P0A265	ppiC Peptidyl-prolyl cis-trans isomerase C	ppiC	15	15	15	15	15	1.54	2.04	1.39	1.16	1.53
Q8ZQU3	sdhA Succinate dehydrogenase flavoprotein subunit	sdhA	15	15	15	15	15	1.25	1.25	1.92	1.69	1.53
P74881	purL Phosphoribosylformylglycinamidine synthase	purL	15	15	15	15	15	2.04	2.04	1.04	0.99	1.53
P0A1V4	adk Adenylate kinase	adk	15	15	15	15	15	1.69	1.54	1.47	1.41	1.53
Q8ZQX6	nagE Sugar Specific PTS family, n-acetylglucosamine-spe	nagE	15	15	15	15	15	1.52	1.56	1.52	1.52	1.53
Q9L4T0	luxS S-ribosylhomocysteine lyase	luxS	15	15	15	15	15	1.85	1.67	1.33	1.25	1.53
P58525	solA N-methyl-L-tryptophan oxidase	solA	15	15	15	15	15	1.92	1.82	1.19	1.16	1.52
P0CL02	csiD Protein CsiD	csiD	15	15	15	15	15	1.75	1.79	1.28	1.27	1.52
P37431	ubiG Ubiquinone biosynthesis O-methyltransferase	ubiG	15	15	15	15	15	1.39	1.61	1.56	1.52	1.52
Q8ZK20	yjgB Putative alcohol dehydrogenase	yjgB	15	15	15	15	15	1.69	1.56	1.45	1.37	1.52
P08421	pyrI Aspartate carbamoyltransferase regulatory chain	pyrI	15	15	15	15	15	2	1.89	1.09	1.1	1.52
Q8ZKC4	yjdC Putative merR family bacterial regulatory protein	yjdC	15	15	12.5	15	14.38	1.82	1.67	1.35	1.23	1.52
P14062	gnd 6-phosphogluconate dehydrogenase, decarboxylating	gnd	9.09	11.11	8.33	12.5	10.26	1.67	2	1.15	1.23	1.51
P06173	rpoB DNA-directed RNA polymerase subunit beta	rpoB	15	15	15	15	15	1.35	1.39	1.67	1.64	1.51
P0A2G9	cbiF Cobalt-precorrin-4 C(11)-methyltransferase	cbiF	15	15	15	15	15	1.67	1.82	1.22	1.33	1.51
Q56073	dnaK Chaperone protein DnaK	dnaK	10.33	11.11	15	12.5	12.24	1.61	1.64	1.43	1.35	1.51
Q7CQX4	sucB Dihydrolipoyllysine-residue succinyltransferase co	sucB	15	15	15	15	15	1.79	2	1.14	1.1	1.51
P0A277	gpt Xanthine phosphoribosyltransferase	gpt	15	15	15	15	15	1.85	1.67	1.27	1.23	1.5
Q8ZJX0	STM4549 Putative cytoplasmic protein	STM4549	12.5	15	15	15	14.38	1.61	1.92	1.33	1.15	1.5
Q7CQV6	ybiV(1) Putative hydrolase of the HAD superfamily	ybiV(1)	15	15	15	12.5	14.38	2.17	1.39	1.28	1.16	1.5
Q8ZJY1	STM4536 Putative PTS permease	STM4536	15	15	15	15	15	1.52	1.72	1.33	1.43	1.5
Q8ZN53	rodZ Cytoskeleton protein RodZ	rodZ	15	10	15	15	13.75	1.72	1.72	1.3	1.25	1.49
Q7CPV3	rcnR Transcriptional repressor RcnR	rcnR	15	15	15	15	15	1.66	1.3	1.3	1.72	1.49
P0A2F2	cobB NAD-dependent protein deacylase	cobB	15	15	15	15	15	1.69	1.69	1.32	1.28	1.49
P0A1I1	phsB Thiosulfate reductase electron transfer subunit Ph	phsB	15	15	15	15	15	1.89	1.61	1.28	1.2	1.49
Q7CPI1	mtlA PTS family, mannitol-specific enzyme IIABC compone	mtlA	15	15	15	15	15	1.64	1.54	1.59	1.22	1.49
Q8ZP91	ldhA NAD-dependent fermentative D-lactate dehydrogenase	ldhA	15	15	15	15	15	1.25	1.27	1.82	1.64	1.49
Q8ZKH6	zur Transcriptional repressor of znuABC operon	zur	15	15	15	15	15	1.67	1.79	1.35	1.16	1.49
Q8ZQC4	cmk Cytidylate kinase	cmk	15	15	12.5	8.33	12.71	1.67	1.64	1.49	1.16	1.49
Q7CQ43	yfcE Phosphoesterase	yfcE	15	12.5	15	15	14.38	1.43	1.67	1.39	1.47	1.49
Q8ZRB2	tesB Acyl-CoA thioesterase II	tesB	15	15	15	15	15	1.89	1.92	1.1	1.04	1.49
Q7CQY3	fur Ferric uptake regulation protein	fur	15	6.25	15	12.5	12.19	1.67	1.64	1.41	1.23	1.49
Q8ZLI5	malQ 4-alpha-glucanotransferase	malQ	15	15	15	15	15	1.69	1.92	1.19	1.14	1.49
Q7CQ33	yfcZ Putative cytoplasmic protein	yfcZ	15	15	15	15	15	1.37	1.54	1.56	1.47	1.49
Q7CR22	queC 7-cyano-7-deazaguanine synthase	queC	15	15	15	15	15	1.72	1.49	1.39	1.33	1.48
Q7CR25	bolA Morphogene putative regulator of murein genes (Bol	bolA	15	15	15	15	15	1.43	1.79	1.33	1.39	1.48
Q9XDN0	pduQ Propanediol utilization propanol dehydrogenase	pduQ	15	15	15	15	15	1.49	1.92	1.37	1.15	1.48
Q8ZR28	cstA Carbon starvation protein	cstA	7.14	12.5	10	15	11.16	1.72	1.82	1.37	1.02	1.48
Q7CQN7	btuE Thioredoxin/glutathione peroxidase BtuE	btuE	15	15	15	15	15	1.64	1.49	1.35	1.45	1.48
Q8ZM76	gcvP Glycine dehydrogenase (decarboxylating)	gcvP	15	15	15	15	15	1.67	1.69	1.3	1.27	1.48
P67645	frdD Fumarate reductase subunit D	frdD	15	15	15	15	15	1.56	1.67	1.27	1.43	1.48
Q7CPE0	mioC Initiation of chromosome replication	mioC	15	11.11	10	15	12.78	1.64	1.85	1.35	1.08	1.48
Q7CP68	osmY Hyperosmotically inducible periplasmic protein	osmY	10	11.11	15	15	12.78	1.47	1.52	1.39	1.54	1.48
Q8ZR77	allC Allantoate amidohydrolase	allC	15	15	15	15	15	1.72	1.64	1.22	1.32	1.47
Q8ZRT0	lpdA Dihydrolipoyl dehydrogenase	lpdA	15	15	15	15	15	1.79	1.72	1.23	1.15	1.47
Q7CQR3	grxB Glutaredoxin 2	grxB	15	15	15	15	15	1.61	1.59	1.37	1.32	1.47
P37168	yceM Putative oxidoreductase YceM	yceM	15	15	15	15	15	1.56	1.52	1.47	1.33	1.47
Q8ZNR2	sbcB Exodeoxyribonuclease I	sbcB	15	12.5	15	15	14.38	1.85	1.92	1.12	0.98	1.47
Q8ZQR2	hutI Imidazolonepropionase	hutI	15	15	15	15	15	1.79	1.72	1.25	1.11	1.47
Q8ZPV7	ansA Cytoplasmic L-asparaginase I	ansA	15	15	15	12.5	14.38	1.52	1.56	1.18	1.61	1.47
Q8ZNW3	edd 6-phosphogluconate dehydratase	edd	15	15	15	15	15	1.52	1.92	1.19	1.23	1.47
P65417	yedP Mannosyl-3-phosphoglycerate phosphatase	yedP	15	15	15	15	15	1.75	1.75	1.16	1.19	1.47
P66692	rpiA Ribose-5-phosphate isomerase A	rpiA	7.14	8.33	12.5	11.11	9.77	1.49	1.49	1.52	1.35	1.46
P40680	erfK Probable L,D-transpeptidase ErfK/SrfK	erfK	15	15	15	12.5	14.38	1.52	2.04	1.14	1.15	1.46
Q8ZJZ3	STM4519 Putative NAD-dependent aldehyde dehydrogenase	STM4519	15	15	10	12.5	13.13	1.43	1.49	1.45	1.47	1.46
Q8ZMF1	ygcH Putative cytoplasmic protein	ygcH	15	15	15	12.5	14.38	2.08	1.61	1.09	1.05	1.46
P0A1R2	hisF Imidazole glycerol phosphate synthase subunit HisF	hisF	15	15	15	15	15	1.92	1.82	1.14	0.95	1.46
P64222	gcvT Aminomethyltransferase	gcvT	15	15	15	15	15	1.32	1.3	1.56	1.64	1.45
Q8ZM45	rdgB dITP/XTP pyrophosphatase	rdgB	15	15	15	15	15	1.47	1.67	1.32	1.35	1.45
Q7CPA4	phnA Putative alkylphosphonate uptake protein in phosph	phnA	15	15	11.11	15	14.03	1.52	1.39	1.43	1.45	1.45
P40732	argD Acetylornithine/succinyldiaminopimelate aminotrans	argD	15	15	15	15	15	1.82	1.54	1.19	1.23	1.45
P0A1R4	hisH Imidazole glycerol phosphate synthase subunit HisH	hisH	15	15	15	15	15	1.72	1.64	1.32	1.1	1.44
Q8ZKL6	argH Argininosuccinate lyase	argH	15	15	6.67	15	12.92	1.89	1.79	1.04	1.06	1.44
Q8ZNE8	menD 2-succinyl-5-enolpyruvyl-6-hydroxy-3-cyclohexene-1	menD	15	15	12.5	15	14.38	1.47	1.45	1.49	1.35	1.44
Q7CPJ3	STM3580 Putative inner membrane lipoprotein	STM3580	15	15	12.5	15	14.38	2.04	1.43	1.25	1.04	1.44
Q8ZPS3	pps Phosphoenolpyruvate synthase	pps	15	15	15	15	15	1.61	1.64	1.3	1.2	1.44
Q8ZQQ0	moaD Molybdopterin synthase sulfur carrier subunit	moaD	15	10	15	15	13.75	1.89	1.39	1.16	1.32	1.44
P67563	serS Serine--tRNA ligase	serS	15	15	15	15	15	1.19	1.22	1.72	1.61	1.44
Q8ZMD9	gudD D-glucarate dehydratase	gudD	15	15	15	12.5	14.38	1.67	1.82	1.12	1.14	1.44
P22713	galK Galactokinase	galK	15	15	15	15	15	1.43	1.54	1.28	1.49	1.44
Q7CPS8	hypO Putative Ni/Fe hydrogenases, small subunit	hypO	15	15	12.5	5.26	11.94	1.92	1.59	1.1	1.12	1.43
Q8ZRJ5	pepD Aminoacyl-histidine dipeptidase (Peptidase D)	pepD	6.25	6.67	15	10	9.48	1.59	1.82	1.14	1.19	1.43
Q8ZKP8	lsrE Putative epimerase LsrE	lsrE	15	15	15	6.25	12.81	1.72	1.61	1.35	1.04	1.43
Q56017	apaG Protein ApaG	apaG	6.25	15	12.5	15	12.19	1.92	1.85	1	0.95	1.43
Q8ZLP8	STM3357 Putative gntR family regulatory protein	STM3357	9.09	15	15	15	13.52	1.61	1.49	1.43	1.19	1.43
P63343	ftsH ATP-dependent zinc metalloprotease FtsH	ftsH	11.11	15	15	15	14.03	1.45	1.43	1.56	1.28	1.43
Q8ZM09	yghA Putative oxidoreductase	yghA	15	15	15	15	15	1.43	1.52	1.43	1.33	1.43
Q8ZLR4	gltB Glutamate synthase, large subunit	gltB	15	15	15	15	15	1.56	1.79	1.16	1.19	1.43
P40788	yddE Uncharacterized isomerase YddE	yddE	15	15	15	8.33	13.33	1.67	1.79	1.15	1.1	1.43
Q8ZLD4	gor Glutathione oxidoreductase	gor	15	15	15	15	15	1.54	1.47	1.41	1.28	1.42
Q7CQI6	yncC Putative gntR family regulatory protein	yncC	15	15	15	15	15	1.45	1.56	1.37	1.32	1.42
Q7CPE9	STM3820 Putative cytochrome c peroxidase	STM3820	6.25	15	15	10	11.56	1.69	1.72	1.19	1.09	1.42
Q8ZKX1	glmS Glutamine--fructose-6-phosphate aminotransferase [	glmS	15	15	15	15	15	1.72	1.61	1.22	1.14	1.42
P60446	rplC 50S ribosomal protein L3	rplC	15	15	15	15	15	1.61	1.67	1.28	1.11	1.42
Q9RF52	pepB Peptidase B	pepB	15	15	15	15	15	1.67	1.52	1.35	1.14	1.42
P55880	yajL Protein/nucleic acid deglycase YajL	yajL	15	15	15	15	15	1.67	1.72	1.09	1.19	1.42
Q8ZLM3	zntR Zn(II)-responsive transcriptional regulator	zntR	15	15	15	15	15	1.47	1.39	1.61	1.19	1.42
P40810	ilvD Dihydroxy-acid dehydratase	ilvD	15	15	12.5	11.11	13.4	1.47	1.47	1.37	1.35	1.42
Q7CPN8	ptsN Sugar specific PTS family enzyme IIA	ptsN	15	15	15	15	15	1.47	1.54	1.35	1.3	1.41
Q8ZME9	yghJ Putative cytoplasmic protein	yghJ	11.11	15	15	15	14.03	1.56	1.69	1.1	1.3	1.41
Q8ZRN1	metQ D-methionine-binding lipoprotein MetQ	metQ	15	15	15	15	15	1.75	1.49	1.05	1.35	1.41
Q7CPA3	STM4314 Putative luxR family bacterial regulatory proteins	STM4314	15	15	15	15	15	1.72	1.39	1.23	1.3	1.41
Q7CR52	crl Sigma factor-binding protein Crl	crl	15	15	15	15	15	1.72	1.52	1.28	1.12	1.41
Q8ZPK6	bioD2 ATP-dependent dethiobiotin synthetase BioD 2	bioD2	15	15	15	15	15	1.43	1.47	1.37	1.37	1.41
P67551	yaeP UPF0253 protein YaeP	yaeP	15	15	15	15	15	1.69	1.59	1.27	1.09	1.41
P67524	dnaT Primosomal protein 1	dnaT	15	15	15	15	15	1.43	1.27	1.89	1.05	1.41
Q8ZM69	serA D-3-phosphoglycerate dehydrogenase	serA	15	15	15	15	15	1.67	1.79	1.11	1.06	1.41
Q8ZK91	yjfP Putative hydrolase of the alpha/beta superfamily	yjfP	15	15	15	15	15	1.49	1.56	1.32	1.25	1.41
Q9XDM8	pduT Propanediol utilization protein	pduT	15	15	15	15	15	1.69	1.61	1.15	1.16	1.41
P05415	glgC Glucose-1-phosphate adenylyltransferase	glgC	15	15	15	15	15	1.25	1.27	1.54	1.56	1.4
Q8ZLL4	slyD Peptidyl-prolyl cis-trans isomerase	slyD	15	15	15	15	15	1.45	1.61	1.32	1.23	1.4
P37592	ompD Outer membrane porin protein OmpD	ompD	5	5	5.56	6.67	5.56	1.89	1.49	1.05	1.18	1.4
P30753	ispE 4-diphosphocytidyl-2-C-methyl-D-erythritol kinase	ispE	15	11.11	15	15	14.03	1.47	1.64	1.33	1.16	1.4
Q8ZMJ9	gutQ Arabinose 5-phosphate isomerase GutQ	gutQ	15	15	15	9.09	13.52	1.54	1.49	1.37	1.2	1.4
P0A2E1	glyA Serine hydroxymethyltransferase	glyA	15	15	15	15	15	1.52	1.54	1.32	1.23	1.4
Q8ZKB4	frdB Succinate dehydrogenase iron-sulfur subunit	frdB	15	15	15	15	15	1.56	1.47	1.35	1.22	1.4
P0A1D5	groS 10 kDa chaperonin	groS	9.09	5.88	15	15	11.24	1.47	1.52	1.27	1.35	1.4
P60217	mtnN 5-methylthioadenosine/S-adenosylhomocysteine nucl	mtnN	15	15	15	15	15	1.56	1.52	1.33	1.19	1.4
Q8ZPJ7	STM1498 Putative dimethyl sulphoxide reductase	STM1498	15	15	15	15	15	1.56	1.61	1.28	1.14	1.4
P65350	mgsA Methylglyoxal synthase	mgsA	15	15	15	15	15	1.56	1.32	1.22	1.49	1.4
P0CL05	nei Endonuclease 8	nei	15	15	9.09	15	13.52	1.69	1.52	1.25	1.12	1.4
Q8ZND6	pta Phosphate acetyltransferase	pta	15	15	15	15	15	1.27	1.49	1.39	1.43	1.39
P64068	engB Probable GTP-binding protein EngB	engB	15	15	15	15	15	1.69	1.52	1.1	1.27	1.39
O68883	gltA Citrate synthase	gltA	15	15	15	15	15	1.35	1.32	1.52	1.39	1.39
P0A1Y4	nuoG NADH-quinone oxidoreductase subunit G	nuoG	15	15	15	15	15	1.61	1.56	1.2	1.19	1.39
Q8ZML7	ygaP Putative rhodanese-related sulfurtransferase	ygaP	15	15	15	15	15	1.61	1.52	1.25	1.19	1.39
P0A2H7	fadA 3-ketoacyl-CoA thiolase	fadA	15	12.5	15	5.56	12.01	1.56	1.59	1.28	1.14	1.39
P0A7K0	rplK 50S ribosomal protein L11	rplK	12.5	15	15	15	14.38	1.54	1.75	1.14	1.14	1.39
P58679	ispH 4-hydroxy-3-methylbut-2-enyl diphosphate reductase	ispH	15	15	15	15	15	1.49	1.61	1.18	1.28	1.39
Q7CPT3	STM3134 Putative permease	STM3134	15	12.5	15	15	14.38	1.61	1.67	1.06	1.22	1.39
Q8ZKB5	blc Outer membrane lipoprotein Blc	blc	15	15	15	15	15	1.39	1.61	1.19	1.37	1.39
P65534	ndk Nucleoside diphosphate kinase	ndk	15	15	15	15	15	1.67	1.49	1.23	1.16	1.39
Q8ZL52	tdh L-threonine 3-dehydrogenase	tdh	15	15	15	15	15	1.39	1.37	1.41	1.39	1.39
Q7CPQ3	yhbS Putative ABC superfamily transport protein	yhbS	15	15	15	15	15	1.54	1.23	1.43	1.35	1.39
Q8ZPY9	STM1239 Putative cytoplasmic protein	STM1239	6.67	6.25	15	15	10.73	1.37	1.75	1.27	1.16	1.39
Q8ZK94	aidB Putative acyl-CoA dehydrogenase	aidB	15	11.11	15	15	14.03	1.37	1.35	1.47	1.35	1.39
Q9ZF31	infB Translation initiation factor IF-2	infB	15	15	15	15	15	1.25	1.25	1.61	1.43	1.39
P66684	rnt Ribonuclease T	rnt	15	15	15	15	15	1.75	1.61	1.09	1.09	1.39
P0A289	prfB Peptide chain release factor 2	prfB	15	15	15	15	15	1.19	1.28	1.64	1.43	1.39
P0A1B5	aroF Phospho-2-dehydro-3-deoxyheptonate aldolase, Tyr-s	aroF	15	15	15	8.33	13.33	1.67	1.23	1.28	1.35	1.38
Q8ZK17	STM4490 Putative Mrr restriction endonuclease	STM4490	15	15	15	15	15	1.54	1.72	1.08	1.19	1.38
Q7CP99	ecnB Putative entericidin B	ecnB	10	12.5	12.5	15	12.5	1.33	1.43	1.32	1.45	1.38
Q8ZNC2	purF Amidophosphoribosyltransferase	purF	15	15	15	15	15	1.32	1.28	1.49	1.43	1.38
P10372	hisA 1-(5-phosphoribosyl)-5-[(5-phosphoribosylamino)met	hisA	15	15	9.09	15	13.52	1.52	1.54	1.28	1.18	1.38
Q7CQU3	dmsB Anaerobic dimethyl sulfoxide reductase, subunit B	dmsB	15	15	15	15	15	1.67	1.43	1.25	1.16	1.38
Q7CQF2	galU UTP--glucose-1-phosphate uridylyltransferase	galU	15	15	15	15	15	1.45	1.35	1.3	1.41	1.38
P37439	ptsG PTS system glucose-specific EIICB component	ptsG	15	15	10	15	13.75	1.56	1.49	1.32	1.14	1.38
P67693	zapD Cell division protein ZapD	zapD	15	15	15	15	15	1.43	1.64	1.09	1.35	1.38
Q8ZLF4	ugpC sn-glycerol-3-phosphate import ATP-binding protein	ugpC	15	7.69	15	15	13.17	1.52	1.56	1.23	1.19	1.38
P26264	cysQ 3(2),5-bisphosphate nucleotidase CysQ	cysQ	15	15	15	15	15	1.61	1.56	1.14	1.19	1.38
P26398	rfbH Lipopolysaccharide biosynthesis protein RfbH	rfbH	15	15	15	15	15	1.61	1.59	1.19	1.11	1.38
Q8ZN75	dapE Succinyl-diaminopimelate desuccinylase	dapE	15	15	15	15	15	1.64	1.56	1.14	1.16	1.38
Q7CQM9	ttrB Tetrathionate reductase subunit B	ttrB	5	15	15	15	12.5	1.45	1.22	1.52	1.32	1.37
Q8ZLR8	rapZ RNase adapter protein RapZ	rapZ	15	15	15	15	15	1.27	1.37	1.43	1.43	1.37
Q7CQS8	tusE Sulfurtransferase TusE	tusE	15	7.69	12.5	10	11.3	1.64	1.54	1.12	1.19	1.37
P64281	greA Transcription elongation factor GreA	greA	8.33	7.14	12.5	15	10.74	1.64	1.69	1.12	1.03	1.37
Q8ZNN4	metG Methionine--tRNA ligase	metG	15	15	15	15	15	1.32	1.32	1.43	1.43	1.37
Q8ZPD4	yncB Putative NADP-dependent oxidoreductase	yncB	15	15	15	15	15	1.49	1.47	1.33	1.19	1.37
Q8ZP29	STM1785 Putative cytoplasmic protein	STM1785	15	15	15	15	15	1.45	1.54	1.28	1.2	1.37
Q8ZQU2	sdhB Succinate dehydrogenase iron-sulfur subunit	sdhB	15	15	15	15	15	1.54	1.54	1.22	1.18	1.37
P0CL03	ampD 1,6-anhydro-N-acetylmuramyl-L-alanine amidase AmpD	ampD	15	15	15	15	15	1.56	1.43	1.32	1.16	1.37
P0CL45	orgB Oxygen-regulated invasion protein OrgB	orgB	15	15	15	15	15	1.56	1.39	1.22	1.3	1.37
Q8ZP16	ycgB Putative cytoplasmic protein	ycgB	15	15	15	15	15	1.52	1.59	1.19	1.18	1.37
Q7CP63	arcA Response regulator (OmpR family) in two-component	arcA	15	15	15	15	15	1.56	1.67	1.22	1.02	1.37
P69936	ydfG NADP-dependent 3-hydroxy acid dehydrogenase YdfG	ydfG	15	15	15	15	15	1.49	1.54	1.28	1.15	1.37
P0A1A1	yciA Acyl-CoA thioester hydrolase YciA	yciA	15	15	10	15	13.75	1.72	1.56	1.28	0.89	1.37
Q7BM06	yigW 3-5 ssDNA/RNA exonuclease TatD	yigW	15	12.5	15	7.14	12.41	1.92	1.41	1.18	0.95	1.37
Q9L6M2	tatD 3-5 ssDNA/RNA exonuclease TatD	tatD	15	12.5	15	7.14	12.41	1.92	1.41	1.18	0.95	1.37
Q8ZNU3	yecA Putative metal-binding protein	yecA	15	15	15	15	15	1.52	1.75	1.19	1	1.37
Q8ZPA8	STM1627 S-(hydroxymethyl)glutathione dehydrogenase	STM1627	15	15	15	15	15	1.49	1.56	1.27	1.14	1.36
P58537	suhB Inositol-1-monophosphatase	suhB	15	15	15	15	15	1.43	1.56	1.15	1.32	1.36
P66409	rpsN 30S ribosomal protein S14	rpsN	15	15	10	15	13.75	1.39	1.45	1.35	1.27	1.36
Q8ZPU2	celF Phospho-beta-glucosidase	celF	9.09	12.5	15	15	12.9	1.45	1.43	1.45	1.12	1.36
Q8ZQZ6	leuS Leucine--tRNA ligase	leuS	15	15	15	15	15	1.19	1.27	1.56	1.43	1.36
Q8ZNW4	eda 2-keto-3-deoxygluconate 6-phosphate aldolase	eda	6.67	5	7.14	8.33	6.79	1.39	1.49	1.25	1.32	1.36
Q8ZMF6	ispD 2-C-methyl-D-erythritol 4-phosphate cytidylyltrans	ispD	15	15	7.69	12.5	12.55	1.67	1.64	1.1	1.04	1.36
Q8ZME0	STM2959 Putative glycerate kinase 2	STM2959	15	7.14	15	15	13.04	1.35	1.69	1.25	1.15	1.36
Q8ZLS0	kdsC 3-deoxy-D-manno-octulosonate 8-phosphate phosphata	kdsC	15	12.5	15	15	14.38	1.47	1.67	1.27	1.04	1.36
Q8ZM82	idi Isopentenyl-diphosphate Delta-isomerase	idi	15	15	15	15	15	1.56	1.59	1.08	1.22	1.36
Q8ZP43	ychJ UPF0225 protein YchJ	ychJ	15	15	15	15	15	1.32	1.75	1.3	1.08	1.36
Q8ZQT9	cydA Cytochrome d terminal oxidase, polypeptide subunit	cydA	12.5	12.5	9.09	10	11.02	1.52	1.59	1.19	1.15	1.36
Q8ZPM9	pdxH Pyridoxine/pyridoxamine 5-phosphate oxidase	pdxH	15	7.14	15	15	13.04	1.56	1.49	1.32	1.06	1.36
P61179	rplV 50S ribosomal protein L22	rplV	5.88	6.25	6.67	8.33	6.78	1.04	1.43	1.61	1.35	1.36
P63557	argB Acetylglutamate kinase	argB	15	15	15	15	15	1.27	1.28	1.52	1.37	1.36
P31570	btuR Cob(I)yrinic acid a,c-diamide adenosyltransferase	btuR	15	15	15	15	15	1.56	1.54	1.22	1.11	1.36
P02936	ompA Outer membrane protein A	ompA	7.69	5.88	5.56	6.25	6.35	1.59	1.61	1.28	0.94	1.36
Q8ZRA2	apt Adenine phosphoribosyltransferase	apt	15	15	15	15	15	1.15	1.92	1.18	1.18	1.36
Q8ZR61	STM0557 Putative inner membrane protein	STM0557	15	15	15	15	15	1.23	1.75	1.14	1.3	1.36
Q8ZQL1	dacC D-alanyl-D-alanine carboxypeptidase penicillin-bin	dacC	7.69	7.69	8.33	15	9.68	1.25	1.82	1.2	1.15	1.36
P0A7V6	rpsC 30S ribosomal protein S3	rpsC	9.09	10	7.69	10	9.2	1.59	1.41	1.22	1.2	1.36
P0A195	uvrA UvrABC system protein A	uvrA	15	15	15	15	15	1.14	1.2	1.56	1.52	1.35
P40720	fumA Fumarate hydratase class I, aerobic	fumA	15	15	15	15	15	1.45	1.45	1.3	1.22	1.35
P58480	htpG Chaperone protein HtpG	htpG	12.5	10	10	12.5	11.25	1.39	1.56	1.15	1.32	1.35
Q8ZP88	ttcA tRNA-cytidine(32) 2-sulfurtransferase	ttcA	15	15	15	15	15	1.41	1.39	1.43	1.19	1.35
P55881	thiL Thiamine-monophosphate kinase	thiL	12.5	15	15	15	14.38	1.06	1.28	1.75	1.32	1.35
Q8ZJX7	STM4540 Putative glucosamine-fructose-6-phosphate aminotra	STM4540	15	15	15	15	15	1.45	1.64	1.14	1.19	1.35
Q8ZMK4	ygaD Putative cytoplasmic protein	ygaD	15	15	15	15	15	1.39	1.3	1.43	1.3	1.35
Q8ZKS2	STM4044 Putative iron-containing alcohol dehydrogenase	STM4044	15	15	15	15	15	1.32	1.3	1.39	1.41	1.35
Q7CQG1	yciO Putative translation factor	yciO	15	15	15	15	15	1.43	1.45	1.25	1.28	1.35
Q8ZM16	hybC Hydrogenase-2, large subunit	hybC	15	12.5	12.5	15	13.75	1.43	1.49	1.28	1.2	1.35
P0A1F2	dapF Diaminopimelate epimerase	dapF	15	15	15	15	15	1.67	1.43	1.15	1.16	1.35
Q8ZML4	ygaM Putative inner membrane protein	ygaM	15	15	15	15	15	1.72	1.69	1.11	0.88	1.35
Q8ZM84	STM3036 Putative inner membrane protein	STM3036	15	15	15	8.33	13.33	1.85	1.45	1.06	1.04	1.35
Q8ZPG9	STM1539 Putative hydrogenase-1 small subunit	STM1539	15	10	15	15	13.75	1.43	1.39	1.35	1.23	1.35
Q8ZLG5	glgB 1,4-alpha-glucan branching enzyme GlgB	glgB	15	15	15	15	15	1.3	1.54	1.32	1.25	1.35
Q8ZKX7	yieH Putative phosphatase/phosphohexomutase	yieH	15	15	15	15	15	1.67	1.41	1.14	1.19	1.35
Q8ZRS7	STM0159 Putative restriction endonuclease	STM0159	15	15	15	15	15	1.41	1.37	1.23	1.39	1.35
P25924	cysG Siroheme synthase	cysG	15	15	15	15	15	1.43	1.56	1.22	1.19	1.35
P36936	pepE Peptidase E	pepE	15	15	15	15	15	1.45	1.43	1.2	1.32	1.35
Q8ZPV2	astC Succinylornithine transaminase	astC	15	15	15	15	15	1.56	1.39	1.28	1.16	1.35
Q8ZN25	murQ N-acetylmuramic acid 6-phosphate etherase	murQ	6.25	15	15	15	12.81	1.47	1.47	1.2	1.25	1.35
Q8ZL99	STM3650 Putative periplasmic or exported protein	STM3650	15	9.09	15	15	13.52	1.47	1.47	1.22	1.23	1.35
P0A2A5	rpmB 50S ribosomal protein L28	rpmB	15	15	15	15	15	1.59	1.41	1.2	1.19	1.35
Q8ZLR6	yhbL Glyoxalase	yhbL	15	15	15	15	15	1.56	1.52	1.27	1.04	1.35
Q7CQK3	pntB NAD(P) transhydrogenase subunit beta	pntB	15	15	15	15	15	1.45	1.59	1.47	0.88	1.35
Q8ZNG3	glpC sn-glycerol-3-phosphate dehydrogenase (Anaerobic),	glpC	15	15	15	15	15	1.47	1.54	1.23	1.14	1.34
B4TKT6	bioH Pimeloyl-[acyl-carrier protein] methyl ester ester	bioH	15	15	15	15	15	1.49	1.49	1.28	1.11	1.34
B5FJT1	bioH Pimeloyl-[acyl-carrier protein] methyl ester ester	bioH	15	15	15	15	15	1.49	1.49	1.28	1.11	1.34
Q8ZLI9	bioH Pimeloyl-[acyl-carrier protein] methyl ester ester	bioH	15	15	15	15	15	1.49	1.49	1.28	1.11	1.34
Q8ZP98	STM1638 Putative SAM-dependent methyltransferase	STM1638	7.69	15	15	15	13.17	1.64	1.52	1.11	1.11	1.34
Q60010	nuoH NADH-quinone oxidoreductase subunit H	nuoH	15	15	15	7.14	13.04	1.59	1.52	1.16	1.11	1.34
Q8ZKR1	STM4067 Putative ADP-ribosylglycohydrolase	STM4067	15	9.09	15	15	13.52	1.49	1.3	1.33	1.25	1.34
Q8ZLM7	def Peptide deformylase	def	15	15	15	15	15	1.52	1.69	1.11	1.05	1.34
A9MY08	frsA Esterase FrsA	frsA	15	15	15	15	15	1.54	1.79	1.04	1.09	1.36
B4SVW0	frsA Esterase FrsA	frsA	15	15	15	15	15	1.54	1.79	1.04	1.09	1.36
B4T7Q1	frsA Esterase FrsA	frsA	15	15	15	15	15	1.54	1.79	1.04	1.09	1.36
B5FJX0	frsA Esterase FrsA	frsA	15	15	15	15	15	1.54	1.79	1.04	1.09	1.36
B5R4S2	frsA Esterase FrsA	frsA	15	15	15	15	15	1.54	1.79	1.04	1.09	1.36
C0Q6T7	frsA Esterase FrsA	frsA	15	15	15	15	15	1.54	1.79	1.04	1.09	1.36
E8XJM0	frsA Esterase FrsA	frsA	15	15	15	15	15	1.54	1.79	1.04	1.09	1.36
P37722	frsA Esterase FrsA	frsA	15	15	15	15	15	1.54	1.79	1.04	1.09	1.36
Q57ST6	frsA Esterase FrsA	frsA	15	15	15	15	15	1.54	1.79	1.04	1.09	1.36
P08870	pyrE Orotate phosphoribosyltransferase	pyrE	15	15	15	15	15	1.28	1.25	1.43	1.41	1.34
Q7CPC8	yihX Putative enzyme	yihX	15	15	15	15	15	1.47	1.52	1.22	1.16	1.34
Q8ZQS1	galM Aldose 1-epimerase	galM	15	15	15	15	15	1.64	1.82	0.98	0.93	1.34
Q7CQ78	fruK Phosphofructokinase	fruK	15	15	15	15	15	1.54	1.72	1.1	1	1.34
Q7CQ51	nuoI NADH-quinone oxidoreductase subunit I	nuoI	15	15	15	15	15	1.45	1.61	1.14	1.16	1.34
Q7CR80	ftsA Cell division protein FtsA	ftsA	15	15	15	15	15	1.59	1.54	1.23	1	1.34
Q8ZQT1	STM0761 Fumarate hydratase Class I anaerobic	STM0761	15	15	15	15	15	1.33	1.85	1.11	1.06	1.34
P19480	ahpF Alkyl hydroperoxide reductase subunit F	ahpF	15	15	15	12.5	14.38	1.37	1.41	1.28	1.3	1.34
Q8ZNN5	apbC Iron-sulfur cluster carrier protein	apbC	15	15	15	15	15	1.52	1.56	1.09	1.19	1.34
Q7CPB9	oxyR Regulatory protein sensor for oxidative stress	oxyR	15	15	15	15	15	1.49	1.32	1.37	1.18	1.34
Q8ZNA2	yfdZ Putative aminotransferase	yfdZ	15	15	15	15	15	1.61	1.49	1.11	1.14	1.34
Q8ZN82	tktB Transketolase	tktB	15	15	15	15	15	1.35	1.56	1.22	1.22	1.34
Q9L6R4	wecC UDP-N-acetyl-D-mannosamine dehydrogenase	wecC	15	15	15	15	15	1.52	1.45	1.25	1.14	1.34
P0A2M1	nrdR Transcriptional repressor NrdR	nrdR	15	15	15	15	15	1.28	1.3	1.47	1.3	1.34
P0A1V6	prs Ribose-phosphate pyrophosphokinase	prs	15	15	12.5	15	14.38	1.52	1.67	1.1	1.06	1.34
Q8ZKB0	rsgA Small ribosomal subunit biogenesis GTPase RsgA	rsgA	15	15	15	15	15	1.47	1.39	1.33	1.15	1.34
Q8ZKY8	yidA Putative hydrolase of the HAD superfamily	yidA	15	15	15	15	15	1.39	1.28	1.39	1.28	1.34
Q8ZRN4	rof Modulator of Rho-dependent transcription terminati	rof	12.5	15	5.26	15	11.94	1.16	1.37	1.32	1.49	1.34
P65992	recR Recombination protein RecR	recR	15	15	15	15	15	1.64	1.56	1.18	0.96	1.33
Q8ZKL1	rluF 23S rRNA pseudouridine(2604) synthase	rluF	15	15	15	15	15	1.43	1.52	1.18	1.22	1.33
P50334	dctA Aerobic C4-dicarboxylate transport protein	dctA	15	15	15	15	15	1.45	1.72	1.11	1.05	1.33
P0CL52	sipA Cell invasion protein SipA	sipA	15	15	15	10	13.75	1.47	1.41	1.27	1.19	1.33
Q7CPS9	hybA Uncharacterized protein	hybA	15	15	15	15	15	1.39	1.28	1.43	1.23	1.33
Q8ZJV1	lplA Lipoate-protein ligase A	lplA	15	15	15	15	15	1.32	1.47	1.37	1.18	1.33
Q8ZNS9	yedJ Putative hydrolase	yedJ	15	15	12.5	12.5	13.75	1.33	1.61	1.14	1.25	1.33
Q56063	prpC 2-methylcitrate synthase	prpC	15	15	15	15	15	1.49	1.45	1.25	1.14	1.33
H9L435	rfaG Glucosyltransferase I	rfaG	15	15	15	15	15	1.35	1.56	1.25	1.16	1.33
P24517	radA DNA repair protein RadA	radA	15	15	15	15	15	1.52	1.33	1.28	1.19	1.33
Q8ZKS9	fdoH Formate dehydrogenase-O, Fe-S subunit	fdoH	15	11.11	12.5	15	13.4	1.37	1.25	1.2	1.49	1.33
Q8ZMK6	alaS Alanine--tRNA ligase	alaS	15	15	15	15	15	1.33	1.33	1.32	1.33	1.33
Q8ZPH0	STM1538 Putative hydrogenase-1 large subunit	STM1538	15	15	15	15	15	1.67	1.39	1.12	1.14	1.33
Q8ZL91	xylB Xylulose kinase	xylB	10	15	15	15	13.75	1.1	1.56	1.22	1.43	1.33
P06110	cheW Chemotaxis protein CheW	cheW	15	15	15	15	15	1.56	1.47	1.14	1.14	1.33
Q8ZM47	yggS Pyridoxal phosphate homeostasis protein	yggS	15	15	15	10	13.75	1.47	1.33	1.28	1.22	1.33
Q93IM5	glk Glucokinase	glk	15	15	15	15	15	1.37	1.43	1.37	1.14	1.33
P60428	rplB 50S ribosomal protein L2	rplB	15	15	15	15	15	1.49	1.47	1.2	1.14	1.33
P0A2K3	gltX Glutamate--tRNA ligase	gltX	15	15	15	15	15	1.33	1.35	1.35	1.27	1.33
Q8ZQQ9	hutH Histidine ammonia-lyase	hutH	15	15	15	15	15	1.54	1.64	1.11	1.01	1.32
Q8ZQ14	fabF 3-oxoacyl-[acyl-carrier-protein] synthase 2	fabF	15	15	15	15	15	1.37	1.43	1.27	1.23	1.32
Q7CPL7	rplQ 50S ribosomal protein L17	rplQ	7.69	9.09	15	15	11.7	1.16	1.43	1.35	1.35	1.32
Q8ZJU7	rob Transcriptional regulator	rob	15	15	15	15	15	1.43	1.28	1.32	1.27	1.32
Q56019	sipB Cell invasion protein SipB	sipB	15	12.5	15	15	14.38	1.32	1.43	1.18	1.37	1.32
P06204	pyrC Dihydroorotase	pyrC	15	15	15	15	15	1.52	1.43	1.28	1.06	1.32
Q8ZQM1	rimO Ribosomal protein S12 methylthiotransferase RimO	rimO	15	15	15	15	15	1.52	1.41	1.27	1.1	1.32
P65215	kdsA 2-dehydro-3-deoxyphosphooctonate aldolase	kdsA	15	15	15	15	15	1.47	1.39	1.27	1.16	1.32
Q7CQU1	pflB Pyruvate formate lyase I, induced anaerobically	pflB	15	15	15	15	15	1.39	1.43	1.25	1.22	1.32
Q8ZRT1	aceF Acetyltransferase component of pyruvate dehydrogen	aceF	15	15	15	15	15	1.32	1.52	1.25	1.2	1.32
Q7CQJ3	STM1534 Putative hydrogenase	STM1534	15	15	15	15	15	1.61	1.32	1.19	1.16	1.32
Q8ZMM8	pipB2 Secreted effector protein PipB2	pipB2	15	15	15	15	15	1.43	1.35	1.25	1.25	1.32
Q7CQE2	ycgM Putative fumarylacetoacetate (FAA) hydrolase famil	ycgM	15	15	15	15	15	1.41	1.56	1.22	1.09	1.32
Q8ZPI3	yneI Putative succinate-semialdehyde dehydrogenase	yneI	15	15	15	15	15	1.43	1.75	1.04	1.05	1.32
P40722	sopD Secreted effector protein SopD	sopD	15	15	15	15	15	1.37	1.43	1.32	1.16	1.32
Q8ZN71	dapA 4-hydroxy-tetrahydrodipicolinate synthase	dapA	15	15	15	15	15	1.45	1.49	1.23	1.1	1.32
Q7CQU4	ycaJ Putative polynucleotide enzyme	ycaJ	15	15	12.5	15	14.38	1.37	1.25	1.49	1.16	1.32
Q8ZNM7	dld Quinone-dependent D-lactate dehydrogenase	dld	15	15	15	15	15	1.54	1.56	1.09	1.09	1.32
P65840	rsuA Ribosomal small subunit pseudouridine synthase A	rsuA	15	15	15	12.5	14.38	1.43	1.43	1.27	1.15	1.32
P26397	rfbG CDP-glucose 4,6-dehydratase	rfbG	15	15	15	15	15	1.22	1.23	1.43	1.39	1.32
P63905	dcd dCTP deaminase	dcd	15	15	15	15	15	1.23	1.19	1.49	1.35	1.32
Q8ZKG8	STM4258 Putative methyl-accepting chemotaxis protein	STM4258	15	15	15	15	15	1.3	1.59	1.22	1.16	1.32
Q8ZME4	mazG Putative pyrophosphatase	mazG	15	15	15	15	15	1.45	1.37	1.3	1.15	1.32
Q8ZPC3	tehB Putative methyltransferase	tehB	15	15	15	15	15	1.41	1.39	1.22	1.25	1.32
Q8ZPQ9	ydiJ Putative oxidase	ydiJ	15	15	15	15	15	1.69	1.47	0.99	1.11	1.32
Q8ZKA3	nsrR HTH-type transcriptional repressor NsrR	nsrR	15	15	15	15	15	1.49	1.47	1.25	1.05	1.32
P0A1X6	map Methionine aminopeptidase	map	15	15	15	15	15	1.47	1.43	1.27	1.1	1.32
P0A1G7	dnaJ Chaperone protein DnaJ	dnaJ	15	15	15	15	15	1.47	1.79	0.94	1.06	1.32
Q8ZPZ7	ycfD Putative cytoplasmic protein	ycfD	15	15	15	15	15	1.59	1.47	1.11	1.09	1.31
Q8ZP65	tpx Thiol peroxidase	tpx	15	15	15	15	15	1.59	1.52	1.11	1.04	1.31
Q8ZPP1	ribE Riboflavin synthase, alpha chain	ribE	15	15	15	15	15	1.54	1.43	1.18	1.11	1.31
Q8ZK31	valS Valine--tRNA ligase	valS	15	15	15	15	15	1.18	1.3	1.41	1.37	1.31
O33799	hpt Hypoxanthine phosphoribosyltransferase	hpt	12.5	12.5	15	15	13.75	1.43	1.49	1.2	1.12	1.31
Q8ZQ40	STM1119 NAD(P)H dehydrogenase (quinone)	STM1119	7.14	9.09	8.33	10	8.64	1.43	1.47	1.25	1.1	1.31
Q8ZM52	yggJ Ribosomal RNA small subunit methyltransferase E	yggJ	15	10	15	15	13.75	1.56	1.47	1.11	1.1	1.31
Q8ZK05	STM4503 Putative inner membrane protein	STM4503	15	15	15	15	15	1.52	1.56	1.1	1.06	1.31
Q7CR93	ribF Riboflavin biosynthesis protein	ribF	15	15	15	15	15	1.47	1.47	1.16	1.14	1.31
Q8ZKR8	yiiM Putative cytoplasmic protein	yiiM	15	15	15	15	15	1.56	1.35	1.16	1.16	1.31
P0A1T2	yceD Large ribosomal RNA subunit accumulation protein Y	yceD	15	15	15	15	15	1.39	1.33	1.27	1.25	1.31
Q8ZRT7	secA Protein translocase subunit SecA	secA	15	15	15	15	15	1.39	1.49	1.22	1.14	1.31
Q8ZQD0	pflA Pyruvate formate-lyase-activating enzyme	pflA	15	15	15	15	15	1.47	1.37	1.27	1.12	1.31
Q8ZLX6	fadH 2,4-dieonyl-coa reductase	fadH	15	12.5	15	15	14.38	1.39	1.56	1.19	1.09	1.31
Q8ZNZ5	yebR Putative GAF domain-containing protein	yebR	15	15	15	15	15	1.72	1.25	1.19	1.06	1.31
P26395	rfbI Protein RfbI	rfbI	15	15	15	15	15	1.41	1.41	1.28	1.12	1.31
Q8ZKY3	mnmE tRNA modification GTPase MnmE	mnmE	7.69	12.5	15	15	12.55	1.43	1.43	1.3	1.06	1.3
P26469	rfaC Lipopolysaccharide heptosyltransferase 1	rfaC	15	12.5	15	15	14.38	1.22	1.61	1.23	1.15	1.3
Q8ZN83	talA Transaldolase A	talA	15	15	15	15	15	1.45	1.49	1.15	1.12	1.3
P25468	pyrD Dihydroorotate dehydrogenase (quinone)	pyrD	15	15	15	15	15	1.43	1.52	1.2	1.06	1.3
Q8ZR56	STM0564 Putative oxidoreductase	STM0564	15	15	15	15	15	1.45	1.56	1.12	1.08	1.3
P66131	rpmA 50S ribosomal protein L27	rpmA	15	15	15	15	15	1.52	1.47	1.03	1.19	1.3
P0A2M7	uxuA Mannonate dehydratase	uxuA	15	15	15	15	15	1.41	1.39	1.2	1.2	1.3
P0A2K1	trpB Tryptophan synthase beta chain	trpB	15	15	15	15	15	1.61	1.39	1.2	1	1.3
Q8ZMC8	fucO L-1,2-propanediol oxidoreductase	fucO	15	15	12.5	9.09	12.9	1.32	1.35	1.22	1.32	1.3
Q8ZRS8	acnB Aconitate hydratase B	acnB	15	15	15	15	15	1.27	1.35	1.33	1.25	1.3
Q9XDN1	pduP Propanediol utilization CoA-dependent propionaldeh	pduP	15	15	15	15	15	1.47	1.39	1.19	1.15	1.3
Q7CQ27	STM2446 Putative iron-dependent peroxidase	STM2446	15	15	15	15	15	1.37	1.52	1.19	1.12	1.3
Q8ZR93	ybbL Putative ABC-type sugar/spermidine/putrescine tran	ybbL	15	15	15	10	13.75	1.43	1.56	1.18	1.03	1.3
Q56062	prpB 2-methylisocitrate lyase	prpB	15	15	15	15	15	1.35	1.49	1.33	1.02	1.3
P67073	ung Uracil-DNA glycosylase	ung	15	15	15	15	15	1.41	1.52	1.11	1.16	1.3
Q8ZLX7	patA Putrescine aminotransferase	patA	15	15	15	15	15	1.45	1.43	1.19	1.12	1.3
P37457	wecG UDP-N-acetyl-D-mannosaminuronic acid transferase	wecG	15	15	12.5	15	14.38	1.47	1.41	1.16	1.15	1.3
Q8ZRE5	yajF Putative sugar kinase/putative transcriptional reg	yajF	15	15	15	15	15	1.39	1.32	1.22	1.27	1.3
Q8ZLS8	folP Dihydropteroate synthase	folP	6.25	15	15	15	12.81	1.43	1.35	1.19	1.22	1.3
Q8ZJX8	STM4539 Putative glucosamine-fructose-6-phosphate aminotra	STM4539	15	15	15	15	15	1.43	1.56	1.11	1.09	1.3
Q8ZQW5	kdpE Response regulator in two-component regulatory sys	kdpE	15	15	15	15	15	1.39	1.47	1.14	1.19	1.3
P0A2G1	smpB SsrA-binding protein	smpB	15	15	15	15	15	1.39	1.47	1.14	1.19	1.3
P0A1H5	tufA Elongation factor Tu	tufA	15	15	15	15	15	1.47	1.43	1.14	1.15	1.3
Q7CQY1	seqA Negative modulator of initiation of replication	seqA	12.5	15	15	15	14.38	1.54	1.39	1.2	1.05	1.3
Q7CR26	cyoA Ubiquinol oxidase subunit 2	cyoA	12.5	15	9.09	15	12.9	1.75	1.15	0.98	1.3	1.3
Q8ZPC9	prr Gamma-aminobutyraldehyde dehydrogenase	prr	15	15	15	15	15	1.41	1.39	1.23	1.15	1.3
Q8ZR26	ybdL Putative aminotransferase	ybdL	15	15	12.5	15	14.38	1.47	1.47	1.25	0.99	1.3
Q7CQY7	phoL Putative phosphate starvation-inducible protein, A	phoL	15	15	15	15	15	1.56	1.43	1.14	1.05	1.3
Q8ZRM9	metN1 Methionine import ATP-binding protein MetN 1	metN1	15	15	15	15	15	1.3	1.54	1.23	1.1	1.29
Q8ZPL0	pntA NAD(P) transhydrogenase subunit alpha	pntA	15	15	15	15	15	1.39	1.43	1.25	1.1	1.29
P0A7S6	rpsL 30S ribosomal protein S12	rpsL	15	15	15	15	15	1.41	1.39	1.28	1.09	1.29
Q8ZMA1	ygeA Putative aspartate racemase	ygeA	12.5	15	15	15	14.38	1.49	1.47	1.15	1.05	1.29
Q7CPM5	tldD Suppresses inhibitory activity of CsrA	tldD	15	15	5.56	15	12.64	1.39	1.47	1.15	1.15	1.29
Q8ZR04	lipA Lipoyl synthase	lipA	15	15	15	15	15	1.47	1.39	1.3	1	1.29
P0A2D1	ucpA Oxidoreductase UcpA	ucpA	15	15	15	15	15	1.41	1.45	1.16	1.14	1.29
Q8ZP10	minD Site-determining protein	minD	15	15	15	15	15	1.49	1.39	1.12	1.15	1.29
O54297	rpsD 30S ribosomal protein S4	rpsD	15	15	15	15	15	1.39	1.52	1.09	1.16	1.29
Q8ZQQ8	ybhB Putative phospholipid-binding protein	ybhB	15	15	15	15	15	1.32	1.14	1.45	1.25	1.29
Q7CQD4	sopE2 Guanine nucleotide exchange factor sopE2	sopE2	15	15	10	15	13.75	1.37	1.43	1.18	1.18	1.29
P0A2S0	lrp Leucine-responsive regulatory protein	lrp	15	15	15	15	15	1.39	1.47	1.2	1.09	1.29
Q7CPY4	srlR Transcriptional repressor for glucitol operon	srlR	12.5	15	15	15	14.38	1.33	1.39	1.27	1.16	1.29
Q8ZPE1	narZ Nitrate reductase 2, alpha subunit	narZ	15	12.5	15	9.09	12.9	1.43	1.41	1.14	1.18	1.29
Q8ZQT0	STM0762 Fumarate hydratase, alpha subunit	STM0762	15	15	12.5	15	14.38	1.45	1.28	1.28	1.14	1.29
Q8ZL69	selA L-seryl-tRNA(Sec) selenium transferase	selA	11.11	15	15	6.25	11.84	1.22	1.56	1.19	1.18	1.29
Q7CQX3	cydB Cytochrome d terminal oxidase polypeptide subunit	cydB	11.11	12.5	6.25	15	11.22	1.43	1.72	1.05	0.94	1.29
P22715	galE UDP-glucose 4-epimerase	galE	15	15	15	15	15	1.35	1.35	1.28	1.16	1.29
P30752	lolB Outer-membrane lipoprotein LolB	lolB	15	15	15	15	15	1.39	1.32	1.25	1.19	1.29
Q8ZRJ6	yafJ Putative glutamine amidotransferase	yafJ	15	15	15	15	15	1.19	1.39	1.43	1.14	1.29
Q8ZNA8	sixA Phosphohistidine phosphatase	sixA	15	10	15	15	13.75	1.19	1.39	1.43	1.14	1.29
Q8ZKA2	rlmB 23S rRNA (guanosine-2-O-)-methyltransferase RlmB	rlmB	15	15	11.11	15	14.03	1.22	1.35	1.41	1.16	1.29
Q8ZNF3	arnB UDP-4-amino-4-deoxy-L-arabinose--oxoglutarate amin	arnB	15	15	15	15	15	1.43	1.41	1.2	1.1	1.29
H9L427	typA GTP-binding elongation factor family protein	typA	15	15	15	15	15	1.47	1.47	1.12	1.08	1.29
Q8ZMJ5	hypF Carbamoyltransferase HypF	hypF	15	15	12.5	15	14.38	1.56	1.41	1.14	1.03	1.28
Q8ZPM7	gst Glutathionine S-transferase	gst	15	15	15	15	15	1.45	1.39	1.16	1.14	1.28
P00910	trpC Tryptophan biosynthesis protein TrpCF	trpC	15	15	11.11	7.69	12.2	1.23	1.49	1.22	1.19	1.28
Q8ZP07	sdaA L-serine deaminase I/L-threonine deaminase I	sdaA	15	15	15	15	15	1.39	1.35	1.22	1.18	1.28
P58688	folD Bifunctional protein FolD	folD	15	15	15	15	15	1.35	1.43	1.16	1.19	1.28
P15717	leuC1 3-isopropylmalate dehydratase large subunit 1	leuC1	7.69	15	15	15	13.17	1.32	1.45	1.2	1.16	1.28
Q8ZNL7	preA NAD-dependent dihydropyrimidine dehydrogenase subu	preA	15	15	15	15	15	1.32	1.28	1.28	1.25	1.28
O54326	mutM Formamidopyrimidine-DNA glycosylase	mutM	15	10	15	15	13.75	1.33	1.64	1.14	1.02	1.28
Q8ZNG6	glpT MFS family, sn-glycerol-3-phosphate transport prot	glpT	15	15	15	15	15	1.32	1.33	1.39	1.09	1.28
Q7CR48	hemB Delta-aminolevulinic acid dehydratase	hemB	15	15	15	15	15	1.25	1.39	1.23	1.25	1.28
Q8ZNH6	napA Periplasmic nitrate reductase	napA	15	15	15	15	15	1.39	1.39	1.15	1.19	1.28
Q8ZNW0	pykA Pyruvate kinase II	pykA	15	15	15	15	15	1.41	1.59	1.1	1.02	1.28
Q9ZFV8	maeB NADP-dependent malic enzyme	maeB	5.56	5.56	5.56	8.33	6.25	1.25	1.45	1.15	1.27	1.28
Q8ZQR8	modE Transcriptional repressor of modABCD operon (Molyb	modE	15	12.5	15	15	14.38	1.39	1.56	1.09	1.08	1.28
Q8ZP03	manX Mannose-specific enzyme IIAB	manX	6.25	10	7.69	15	9.74	1.35	1.28	1.16	1.32	1.28
Q56056	rnc Ribonuclease 3	rnc	15	15	15	15	15	1.47	1.43	1.11	1.1	1.28
H9L487	purN Phosphoribosylglycinamide formyltransferase	purN	15	11.11	15	15	14.03	1.35	1.47	1.16	1.12	1.28
Q8ZQB6	mukE Chromosome partition protein MukE	mukE	15	15	15	15	15	1.33	1.35	1.3	1.12	1.28
P26405	rfbK Phosphomannomutase	rfbK	15	15	15	15	15	1.35	1.35	1.27	1.14	1.28
Q7CQ12	iscA Iron-binding protein IscA	iscA	15	15	15	15	15	1.39	1.19	1.39	1.14	1.28
P0A1N0	spaK Surface presentation of antigens protein SpaK	spaK	15	15	15	15	15	1.56	1.35	1.19	1	1.28
P02941	tar Methyl-accepting chemotaxis protein II	tar	15	15	6.25	15	12.81	1.3	1.3	1.56	0.94	1.28
Q8ZNZ9	rrmA 23S rRNA m1G745 methyltransferase	rrmA	15	15	15	15	15	1.47	1.25	1.22	1.16	1.28
Q7CQY9	gltL Glutamate/aspartate transporter	gltL	9.09	15	15	15	13.52	1.28	1.2	1.28	1.33	1.28
P63521	fadD Long-chain-fatty-acid--CoA ligase	fadD	15	15	15	15	15	1.11	1.85	1.14	1	1.27
P0A2Q2	ilvY HTH-type transcriptional activator IlvY	ilvY	15	15	15	10	13.75	1.43	1.35	1.22	1.1	1.27
Q8ZRR1	panC Pantothenate synthetase	panC	15	15	15	15	15	1.23	1.43	1.3	1.14	1.27
Q7CR66	erpA Iron-sulfur cluster insertion protein ErpA	erpA	15	15	15	15	15	1.43	1.47	1.09	1.11	1.27
O31041	pduD Propanediol dehydratase medium subunit	pduD	15	15	15	15	15	1.43	1.41	1.12	1.14	1.27
Q8ZP50	ompW Outer membrane protein W	ompW	5.26	5.56	5.56	7.14	5.88	1.56	1.3	1.14	1.1	1.27
Q7CQP3	osmE Transcriptional activator of ntrL protein	osmE	15	7.69	15	15	13.17	1.54	1.43	1.04	1.09	1.27
Q7CQ50	nuoB NADH-quinone oxidoreductase subunit B	nuoB	15	15	15	15	15	1.49	1.45	1.11	1.04	1.27
Q8ZPK0	dmsD Tat proofreading chaperone DmsD	dmsD	9.09	15	15	15	13.52	1.3	1.47	1.08	1.25	1.27
Q7CQU5	trxB Thioredoxin reductase	trxB	15	15	15	15	15	1.39	1.3	1.28	1.12	1.27
Q05603	cobT Nicotinate-nucleotide--dimethylbenzimidazole phosp	cobT	15	15	15	15	15	1.47	1.39	1.19	1.04	1.27
Q8ZMW7	pheA Chorismate mutase P	pheA	15	15	15	15	15	1.39	1.39	1.25	1.06	1.27
Q8ZQK7	STM0867 Putative hydrolase	STM0867	15	10	15	15	13.75	1.35	1.56	1.18	1	1.27
Q05590	cbiH Probable cobalt-factor III C(17)-methyltransferase	cbiH	15	15	15	15	15	1.19	1.47	1.27	1.16	1.27
P37178	ptsP Phosphoenolpyruvate-dependent phosphotransferase s	ptsP	15	15	15	15	15	1.3	1.39	1.15	1.25	1.27
Q8ZRN9	lpxB Lipid-A-disaccharide synthase	lpxB	15	8.33	15	12.5	12.71	1.16	1.52	1.28	1.12	1.27
Q8ZLC0	kdgK Ketodeoxygluconokinase	kdgK	15	15	15	15	15	1.32	1.56	1.16	1.04	1.27
Q7CR42	STM0402 Putative thiol-alkyl hydroperoxide reductase	STM0402	15	15	15	15	15	1.39	1.33	1.18	1.18	1.27
Q8ZJX5	dnaC Chromosome replication protein	dnaC	15	15	10	15	13.75	1.28	1.45	1.22	1.12	1.27
Q8ZQT2	aroG Phospho-2-dehydro-3-deoxyheptonate aldolase	aroG	15	15	15	15	15	1.52	1.35	1.18	1.03	1.27
Q8ZL96	glyS Glycine--tRNA ligase beta subunit	glyS	15	15	15	15	15	1.35	1.35	1.23	1.14	1.27
P77980	aroB 3-dehydroquinate synthase	aroB	15	15	15	12.5	14.38	1.39	1.27	1.28	1.14	1.27
P58718	pdxA2 D-threonate 4-phosphate dehydrogenase	pdxA2	15	15	15	15	15	1.3	1.47	1.14	1.16	1.27
P06614	cysB HTH-type transcriptional regulator CysB	cysB	15	12.5	15	15	14.38	1.32	1.45	1.11	1.19	1.27
Q8ZRD8	tgt Queuine tRNA-ribosyltransferase	tgt	12.5	15	15	15	14.38	1.3	1.28	1.22	1.27	1.27
Q7CQE0	tsaB tRNA threonylcarbamoyladenosine biosynthesis prote	tsaB	15	15	15	15	15	1.28	1.28	1.35	1.15	1.27
Q9Z4S6	ttrA Tetrathionate reductase subunit A	ttrA	15	15	15	15	15	1.43	1.49	1.1	1.04	1.27
Q7CPL4	rplP 50S ribosomal protein L16	rplP	7.69	7.14	5	5.56	6.35	1.52	1.37	1.18	1	1.27
P22253	pncB Nicotinate phosphoribosyltransferase	pncB	15	15	15	15	15	1.47	1.28	1.3	1.01	1.27
Q9L6L1	hemG Protoporphyrinogen IX dehydrogenase [menaquinone]	hemG	15	15	15	15	15	1.23	1.35	1.18	1.3	1.27
P55891	motA Motility protein A	motA	15	15	15	15	15	1.39	1.35	1.3	1.02	1.26
Q8ZKE2	fumB Fumarate hydratase class I	fumB	15	15	15	15	15	1.43	1.39	1.18	1.06	1.26
Q7CQU9	STM0932 Putative nucleoside-diphosphate-sugar epimerase	STM0932	15	15	15	15	15	1.41	1.47	1.09	1.09	1.26
P28354	lysS Lysine--tRNA ligase	lysS	15	15	15	15	15	1.32	1.45	1.11	1.18	1.26
Q7DAP2	PSLT046 Putative carbonic anhydrase	PSLT046	15	15	7.14	15	13.04	1.22	1.43	1.27	1.14	1.26
P0CL51	argS Arginine--tRNA ligase	argS	15	15	15	15	15	1.37	1.3	1.19	1.19	1.26
P32200	lpxA Acyl-[acyl-carrier-protein]--UDP-N-acetylglucosami	lpxA	15	15	15	15	15	1.09	1.45	1.45	1.06	1.26
Q9L6L9	fre NAD(P)H-flavin reductase	fre	15	15	15	15	15	1.39	1.37	1.1	1.19	1.26
Q56067	moeB Molybdopterin-synthase adenylyltransferase	moeB	15	15	15	15	15	1.47	1.52	1.14	0.93	1.26
P06187	hsdS Type-1 restriction enzyme StySJI specificity prote	hsdS	15	15	15	15	15	1.37	1.32	1.35	1.01	1.26
P33901	nuoF NADH-quinone oxidoreductase subunit F	nuoF	15	15	15	15	15	1.45	1.43	1.12	1.04	1.26
Q8ZP71	STM1676 Putative aldo/keto reductase family	STM1676	15	15	15	15	15	1.39	1.43	1.2	1.02	1.26
Q7CPW4	ygcF 7-carboxy-7-deazaguanine synthase	ygcF	15	15	15	15	15	1.45	1.32	1.19	1.09	1.26
Q7CQP4	ydjA Putative oxidoreductase	ydjA	15	15	15	15	15	1.35	1.39	1.19	1.11	1.26
P65882	purA Adenylosuccinate synthetase	purA	15	15	15	15	15	1.41	1.37	1.18	1.09	1.26
Q7CPB2	yjbJ UPF0337 protein YjbJ	yjbJ	12.5	15	15	8.33	12.71	1.05	1.43	1.19	1.37	1.26
Q8ZQC0	kdsB 3-deoxy-manno-octulosonate cytidylyltransferase	kdsB	15	15	15	15	15	1.39	1.35	1.23	1.06	1.26
Q7CPC7	yiiD Putative acetyltransferase	yiiD	15	15	15	15	15	1.28	1.64	1.08	1.04	1.26
Q8ZQU0	sucD Succinate--CoA ligase [ADP-forming] subunit alpha	sucD	15	15	15	15	15	1.41	1.27	1.25	1.11	1.26
Q8ZPQ2	sufD Iron-sulfur component of FhuF stability protein	sufD	15	15	15	15	15	1.32	1.56	1.18	0.98	1.26
P65692	pfkA ATP-dependent 6-phosphofructokinase	pfkA	15	15	15	15	15	1.41	1.35	1.15	1.12	1.26
Q7CPE7	phoU Phosphate-specific transport system accessory prot	phoU	15	15	15	15	15	1.41	1.47	1.11	1.04	1.26
H9L4A3	lpxO Putative dioxygenase for synthesis of lipid	lpxO	9.09	15	15	15	13.52	1.41	1.47	1.05	1.1	1.26
Q8ZRE3	sbcC Nuclease SbcCD subunit C	sbcC	5.56	15	15	15	12.64	1.27	1.52	1.11	1.14	1.26
P0A2N2	vsdE Virulence protein vsdE	vsdE	12.5	15	11.11	15	13.4	1.3	1.43	1.16	1.14	1.26
Q8ZRD9	queA S-adenosylmethionine:tRNA ribosyltransferase-isome	queA	15	15	15	15	15	1.49	1.14	1.06	1.33	1.26
Q8ZP45	adhE Aldehyde-alcohol dehydrogenase	adhE	15	15	15	15	15	1.33	1.43	1.18	1.09	1.26
Q7CQR1	pabC 4-amino-4-deoxychorismate lyase	pabC	15	15	15	15	15	1.43	1.37	1.2	1.02	1.26
P0A1F8	asd Aspartate-semialdehyde dehydrogenase	asd	15	15	15	15	15	1.25	1.12	1.35	1.3	1.26
P07637	aroA 3-phosphoshikimate 1-carboxyvinyltransferase	aroA	15	15	15	15	15	1.39	1.35	1.22	1.06	1.26
P26977	purD Phosphoribosylamine--glycine ligase	purD	15	15	6.67	15	12.92	1.39	1.49	1.09	1.05	1.26
Q08021	yjgM Uncharacterized N-acetyltransferase YjgM	yjgM	15	15	15	15	15	1.52	1.27	1.22	1.02	1.26
P60317	proQ RNA chaperone ProQ	proQ	15	15	15	15	15	1.32	1.39	1.32	1	1.26
Q8ZPW5	yeaK Putative cytoplasmic protein	yeaK	15	15	15	15	15	1.45	1.37	1.22	0.98	1.25
Q93GR9	repA2 DNA replication	repA2	5	15	15	12.5	11.88	1.39	1.43	1.14	1.06	1.25
Q8ZMQ8	STM2746 Putative excinuclease ATPase subunit	STM2746	15	15	15	15	15	1.54	1.35	1.06	1.06	1.25
H9L426	sscA Secretion system chaparone	sscA	15	15	15	15	15	1.79	1.02	1.12	1.09	1.25
Q8ZNW1	yebK Putative transcriptional regulator	yebK	15	15	15	15	15	1.43	1.39	1.08	1.12	1.25
Q8ZKF6	acs Acetyl-coenzyme A synthetase	acs	15	15	15	15	15	1.37	1.25	1.22	1.18	1.25
Q8ZQ64	rlmI Ribosomal RNA large subunit methyltransferase I	rlmI	15	15	15	15	15	1.39	1.35	1.18	1.1	1.25
P24518	nadR Trifunctional NAD biosynthesis/regulator protein N	nadR	15	15	15	15	15	1.37	1.47	1.11	1.06	1.25
Q7CPN9	yhbG Putative ABC superfamily transport protein	yhbG	15	15	15	15	15	1.47	1.39	1.08	1.08	1.25
Q8ZQ72	uup Putative ATPase component of ABC transporter	uup	15	15	15	15	15	1.3	1.41	1.12	1.18	1.25
P0A2T6	crp cAMP-activated global transcriptional regulator CR	crp	15	15	15	15	15	1.37	1.39	1.14	1.11	1.25
Q7CPY9	emrR Transcriptional repressor of emrAB operon	emrR	15	15	15	15	15	1.45	1.33	1.14	1.09	1.25
Q7CP65	serB 3-phosphoserine phosphatase	serB	15	12.5	9.09	15	12.9	1.45	1.39	1.25	0.92	1.25
Q8ZKC2	dcuA Anaerobic C4-dicarboxylate transporter	dcuA	15	15	15	15	15	1.45	1.43	1.14	0.99	1.25
Q7CR46	iraP Anti-adapter protein IraP	iraP	15	15	15	15	15	1.37	1.54	1.03	1.06	1.25
Q8ZPZ4	mnmA tRNA-specific 2-thiouridylase MnmA	mnmA	15	15	15	15	15	1.47	1.28	1.22	1.03	1.25
P07691	pyrF Orotidine 5-phosphate decarboxylase	pyrF	15	15	15	15	15	1.39	1.32	1.23	1.06	1.25
Q8ZMD2	ygdH Putative nucleotide binding	ygdH	15	15	15	15	15	1.41	1.41	1.1	1.09	1.25
Q8ZLQ7	nanE2 Putative N-acetylmannosamine-6-phosphate 2-epimera	nanE2	15	15	15	15	15	1.27	1.12	1.45	1.16	1.25
Q9L6R1	wecD dTDP-fucosamine acetyltransferase	wecD	15	15	15	15	15	1.35	1.45	1.14	1.06	1.25
H9L4C4	orf245 Putative cytoplasmic protein	orf245	15	15	15	15	15	1.64	1.35	1.01	1	1.25
P65836	rluD Ribosomal large subunit pseudouridine synthase D	rluD	15	15	15	15	15	1.27	1.28	1.32	1.14	1.25
P67341	ymdB O-acetyl-ADP-ribose deacetylase	ymdB	15	15	15	15	15	1.37	1.35	1.19	1.09	1.25
Q8ZPN1	anmK Anhydro-N-acetylmuramic acid kinase	anmK	15	15	15	15	15	1.49	1.43	1.12	0.95	1.25
Q8ZNP1	yegS Probable lipid kinase YegS	yegS	15	15	15	15	15	1.43	1.37	1.09	1.11	1.25
P15434	pheT Phenylalanine--tRNA ligase beta subunit	pheT	15	15	15	15	15	1.37	1.43	1.11	1.09	1.25
Q8ZPZ5	hflD High frequency lysogenization protein HflD homolog	hflD	15	15	15	15	15	1.43	1.37	1.02	1.18	1.25
Q7CPU9	zapA Cell division protein ZapA	zapA	15	15	11.11	12.5	13.4	1.41	1.39	1.1	1.1	1.25
P67038	pheS Phenylalanine--tRNA ligase alpha subunit	pheS	15	15	15	15	15	1.3	1.37	1.18	1.15	1.25
Q8ZMC6	fucI L-fucose isomerase	fucI	15	15	15	15	15	1.49	1.37	1.11	1.02	1.25
P40783	qor Quinone oxidoreductase	qor	15	15	15	15	15	1.25	1.39	1.19	1.16	1.25
P0AA13	rplM 50S ribosomal protein L13	rplM	5.56	10	7.69	7.14	7.6	1.04	1.32	1.28	1.35	1.25
P07362	dnaG DNA primase	dnaG	11.11	15	15	15	14.03	1.22	1.28	1.3	1.19	1.25
P66955	talB Transaldolase B	talB	15	15	15	15	15	1.39	1.39	1.1	1.11	1.25
P27237	prlC Oligopeptidase A	prlC	15	15	15	15	15	1.27	1.27	1.23	1.22	1.25
Q8ZLJ4	hslO 33 kDa chaperonin	hslO	15	15	15	15	15	1.43	1.43	1.06	1.06	1.25
P58696	asnS Asparagine--tRNA ligase	asnS	15	15	15	15	15	1.32	1.47	1.11	1.09	1.25
Q7CPP6	ispB Octaprenyl diphosphate synthase	ispB	15	15	15	15	15	1.3	1.3	1.09	1.3	1.25
P26406	rfbP Undecaprenyl-phosphate galactose phosphotransferas	rfbP	15	15	15	15	15	1.35	1.28	1.28	1.06	1.24
P66541	rpsB 30S ribosomal protein S2	rpsB	15	15	15	15	15	1.35	1.39	1.16	1.08	1.24
P40194	yfeJ Putative glutamine amidotransferase-like protein Y	yfeJ	15	15	15	15	15	1.54	1.16	1.23	1.04	1.24
Q8ZQN6	ybiB Putative transferase	ybiB	15	15	5.56	12.5	12.01	1.45	1.39	1.08	1.06	1.24
Q8ZPN5	ydhF Putative aldo/keto reductase	ydhF	15	15	15	15	15	1.39	1.43	1.15	1.01	1.24
Q7CQ39	usg Putative aspartate-semialdehyde dehydrogenase	usg	15	15	15	15	15	1.41	1.47	1.09	1.01	1.24
Q9L646	nrdD Anaerobic ribonucleoside-triphosphate reductase	nrdD	15	15	15	15	15	1.28	1.27	1.23	1.19	1.24
Q8ZLB1	dppD Dipeptide transport protein	dppD	15	15	15	15	15	1.32	1.45	1.18	1.03	1.24
Q8ZPQ3	sufC Putative transport protein	sufC	15	15	15	15	15	1.32	1.41	1.11	1.14	1.24
Q8ZQR5	ybhA Putative hydrolase of the HAD superfamily	ybhA	10	15	15	15	13.75	1.23	1.41	1.2	1.12	1.24
Q8ZLU5	yraL Ribosomal RNA small subunit methyltransferase I	yraL	15	15	15	12.5	14.38	1.37	1.22	1.19	1.19	1.24
Q8ZLD1	STM3600 Putative sugar kinases	STM3600	15	15	15	15	15	1.47	1.3	1.14	1.06	1.24
O30916	sopB Inositol phosphate phosphatase SopB	sopB	15	15	15	15	15	1.33	1.45	1.11	1.08	1.24
P60817	yfbU UPF0304 protein YfbU	yfbU	7.14	15	8.33	12.5	10.74	1.35	1.45	1.03	1.14	1.24
Q8ZK66	mpl UDP-N-acetylmuramate--L-alanyl-gamma-D-glutamyl-me	mpl	15	15	15	15	15	1.35	1.28	1.23	1.1	1.24
P20751	fic Probable adenosine monophosphate-protein transfera	fic	15	15	15	15	15	1.41	1.32	1.18	1.06	1.24
P37415	PSLT051 Recombination-promoting nuclease pSLT051	PSLT051	15	15	15	15	15	1.25	1.47	1.19	1.05	1.24
P0A257	plsC 1-acyl-sn-glycerol-3-phosphate acyltransferase	plsC	15	15	15	10	13.75	1.28	1.28	1.2	1.19	1.24
Q8ZNZ7	kdgR Putative IclR family transcriptional repressor	kdgR	15	15	12.5	15	14.38	1.43	1.35	1.14	1.04	1.24
Q8ZLQ3	yhcM Cell division protein ZapE	yhcM	10	15	15	10	12.5	1.39	1.25	1.22	1.1	1.24
Q7CPU5	epd D-erythrose-4-phosphate dehydrogenase	epd	15	12.5	15	15	14.38	1.28	1.28	1.28	1.11	1.24
Q8ZPP5	ssrA Histidine kinase	ssrA	7.69	15	15	15	13.17	1.27	1.23	1.19	1.27	1.24
Q8ZND5	STM2340 Putative transketolase	STM2340	15	15	15	15	15	1.35	1.27	1.18	1.16	1.24
P14845	carA Carbamoyl-phosphate synthase small chain	carA	15	15	15	12.5	14.38	1.28	1.33	1.19	1.15	1.24
Q93GQ8	parA Plasmid partition protein A	parA	15	15	15	15	15	1.43	1.35	1.11	1.06	1.24
P67520	rlmH Ribosomal RNA large subunit methyltransferase H	rlmH	12.5	15	15	15	14.38	1.43	1.39	1.16	0.97	1.24
O54453	trpH 5-3 exoribonuclease	trpH	15	15	15	7.14	13.04	1.32	1.41	1.15	1.08	1.24
P17750	katG Catalase-peroxidase	katG	15	15	15	15	15	1.32	1.67	1.15	1.09	1.3
Q93GQ7	parB Plasmid partition protein B	parB	15	15	15	15	15	1.16	1.41	1.2	1.16	1.23
P33321	infC Translation initiation factor IF-3	infC	7.14	7.14	10	6.25	7.63	1.37	1.47	1.28	0.81	1.23
Q8ZMX4	trxC Thioredoxin	trxC	15	15	15	15	15	1.11	1.06	1.41	1.35	1.23
Q8ZQL2	yliJ Putative glutathione S-transferase	yliJ	15	15	15	15	15	1.19	1.28	1.3	1.16	1.23
Q8ZKT0	fdhE Protein FdhE	fdhE	15	15	15	15	15	1.39	1.37	1.06	1.11	1.23
P0A2B5	rimM Ribosome maturation factor RimM	rimM	15	15	15	15	15	1.35	1.18	1.12	1.28	1.23
Q8ZNM5	yohF Putative oxidoreductase	yohF	15	15	15	15	15	1.43	1.27	1.15	1.09	1.23
Q8ZLA4	tag Constitutive 3-methyl-adenine DNA glycosylase I	tag	15	15	15	15	15	1.52	1.33	0.94	1.14	1.23
Q7CQK7	tyrS Tyrosine--tRNA ligase	tyrS	15	15	15	15	15	1.35	1.35	1.12	1.1	1.23
P40790	potA Spermidine/putrescine import ATP-binding protein P	potA	15	15	15	7.14	13.04	1.32	1.41	1.14	1.06	1.23
Q8ZM80	ygfZ tRNA-modifying protein YgfZ	ygfZ	15	15	15	15	15	1.37	1.39	1.12	1.04	1.23
Q7CPM0	accC Acetyl CoA carboxylase	accC	15	15	15	15	15	1.35	1.3	1.16	1.11	1.23
Q7CQG7	yciT Putative deoR family regulatory protein	yciT	15	15	15	15	15	1.35	1.28	1.19	1.1	1.23
P0A249	ptsI Phosphoenolpyruvate-protein phosphotransferase	ptsI	15	15	15	15	15	1.37	1.43	1.11	1.01	1.23
P26402	rfbU Protein RfbU	rfbU	15	15	15	15	15	1.3	1.33	1.18	1.11	1.23
Q7CPV7	ygdK Putative SufE protein probably involved in Fe-S ce	ygdK	15	15	6.67	15	12.92	1.45	1.22	1.16	1.09	1.23
Q8ZMF8	truD tRNA pseudouridine synthase D	truD	15	15	15	15	15	1.41	1.3	1.11	1.1	1.23
P66313	rplF 50S ribosomal protein L6	rplF	15	15	15	15	15	1.33	1.37	1.15	1.06	1.23
Q8ZNF9	rhmD L-rhamnonate dehydratase	rhmD	15	15	15	15	15	1.3	1.18	1.25	1.19	1.23
P68684	rpsU 30S ribosomal protein S21	rpsU	15	15	15	15	15	1.1	1.11	1.39	1.32	1.23
Q8ZR86	allR HTH-type transcriptional repressor AllR	allR	15	15	12.5	15	14.38	1.33	1.28	1.16	1.14	1.23
P62405	rplE 50S ribosomal protein L5	rplE	15	15	15	15	15	1.25	1.43	1.11	1.12	1.23
Q8ZK67	fbp Fructose-1,6-bisphosphatase class 1	fbp	15	15	15	15	15	1.35	1.28	1.19	1.09	1.23
P66764	metK S-adenosylmethionine synthase	metK	15	15	15	15	15	1.28	1.32	1.18	1.14	1.23
Q7CQV5	iaaA Isoaspartyl peptidase	iaaA	15	15	15	15	15	1.45	1.39	1.16	0.91	1.23
Q8ZQX5	glnS Glutamine--tRNA ligase	glnS	15	15	15	15	15	1.23	1.23	1.25	1.19	1.23
Q8ZME1	rlmD 23S rRNA (uracil(1939)-C(5))-methyltransferase Rlm	rlmD	15	12.5	15	15	14.38	1.33	1.32	1.12	1.14	1.23
P58627	yceF Maf-like protein YceF	yceF	15	15	15	15	15	1.27	1.39	1.19	1.06	1.23
Q8ZL24	STM3775 Putative glycosyl hydrolase family	STM3775	15	15	15	15	15	1.22	1.39	1.16	1.14	1.23
Q7CPE4	atpF ATP synthase subunit b	atpF	15	10	11.11	10	11.53	1.27	1.28	1.28	1.08	1.23
Q8ZMC1	ygdL Putative enzyme	ygdL	15	15	15	15	15	1.35	1.23	1.3	1.02	1.23
Q7CPG6	slsA Putative inner membrane protein	slsA	12.5	10	15	7.14	11.16	1.39	1.19	1.08	1.25	1.23
P04042	cheB Chemotaxis response regulator protein-glutamate me	cheB	15	15	15	15	15	1.25	1.35	1.05	1.25	1.23
P66451	rpsQ 30S ribosomal protein S17	rpsQ	15	15	15	15	15	1.32	1.35	1.1	1.14	1.23
P55890	dsbC Thiol:disulfide interchange protein DsbC	dsbC	15	15	15	15	15	1.23	1.35	1.12	1.19	1.22
Q8ZRA0	gsk Inosine-guanosine kinase	gsk	15	15	11.11	15	14.03	1.47	1.27	1.16	1	1.22
Q8ZRU2	murC UDP-N-acetylmuramate--L-alanine ligase	murC	15	15	12.5	15	14.38	1.25	1.27	1.19	1.19	1.22
P19566	malK Maltose/maltodextrin import ATP-binding protein Ma	malK	15	15	15	15	15	1.28	1.23	1.32	1.06	1.22
P74876	dnaX DNA polymerase III subunit tau	dnaX	15	15	15	15	15	1.33	1.27	1.22	1.08	1.22
P65792	proB Glutamate 5-kinase	proB	15	15	15	15	15	1.28	1.33	1.19	1.09	1.22
Q8ZK29	pepA Probable cytosol aminopeptidase	pepA	11.11	15	8.33	12.5	11.74	1.28	1.35	1.2	1.05	1.22
P58729	aroC Chorismate synthase	aroC	15	15	15	15	15	1.01	1.3	1.32	1.27	1.22
P26475	asrB Anaerobic sulfite reductase subunit B	asrB	15	15	15	15	15	1.22	1.35	1.22	1.1	1.22
Q7CQW6	moaB Molybdenum cofactor biosynthesis protein B	moaB	15	15	15	15	15	1.35	1.25	1.18	1.11	1.22
Q8ZK11	STM4496 Putative ATPase involved in DNA repair	STM4496	15	15	15	15	15	1.35	1.35	1.1	1.09	1.22
P26219	cdh CDP-diacylglycerol pyrophosphatase	cdh	15	15	15	15	15	1.52	1.45	0.98	0.94	1.22
P0A2Q0	hdfR HTH-type transcriptional regulator HdfR	hdfR	15	8.33	15	15	13.33	1.33	1.33	1.19	1.03	1.22
Q8ZLG1	yhhY Putative transferase	yhhY	15	15	15	15	15	1.43	1.35	1.09	1.02	1.22
Q8ZLY4	cca Multifunctional CCA protein	cca	12.5	15	15	15	14.38	1.37	1.28	1.14	1.1	1.22
Q9F173	polA DNA polymerase I	polA	15	15	15	15	15	1.25	1.27	1.23	1.14	1.22
Q7CQE8	ychF Ribosome-binding ATPase YchF	ychF	15	15	15	15	15	1.35	1.37	1.12	1.04	1.22
Q8ZLM6	fmt Methionyl-tRNA formyltransferase	fmt	15	15	15	15	15	1.18	1.35	1.23	1.12	1.22
Q8ZPU5	nadE NH(3)-dependent NAD(+) synthetase	nadE	15	15	15	15	15	1.23	1.35	1.18	1.12	1.22
Q8ZM22	STM3138 Putative methyl-accepting chemotaxis protein	STM3138	15	15	15	15	15	1.45	1.41	1.08	0.95	1.22
P41791	eutM Ethanolamine utilization protein EutM	eutM	15	8.33	15	15	13.33	1.08	1.1	1.43	1.28	1.22
P63411	ackA Acetate kinase	ackA	15	15	15	15	15	1.35	1.27	1.19	1.08	1.22
Q9L6R3	rffG dTDP-glucose 4,6-dehydratase	rffG	15	15	15	15	15	1.19	1.56	1.1	1.03	1.22
Q8ZLM1	rpsM 30S ribosomal protein S13	rpsM	15	15	15	15	15	1.27	1.23	1.22	1.16	1.22
H9L4B1	orf319 Putative inner membrane protein	orf319	15	15	15	15	15	1.19	1.37	1.35	0.97	1.22
Q8ZPS9	thrS Threonine--tRNA ligase	thrS	15	15	15	15	15	1.3	1.33	1.16	1.09	1.22
Q06995	rfaP Lipopolysaccharide core heptose(I) kinase RfaP	rfaP	9.09	15	15	15	13.52	1.35	1.32	1.06	1.15	1.22
P18949	metC Cystathionine beta-lyase	metC	15	15	15	15	15	1.47	1.35	1.12	0.93	1.22
Q8ZLG8	STM3533 Putative bacterial transcriptional regulator	STM3533	15	15	15	15	15	1.32	1.16	1.23	1.16	1.22
Q7CQ04	yfiF Putative tRNA/rRNA methyltransferase	yfiF	15	15	15	15	15	1.3	1.35	1.2	1.02	1.22
Q8ZLB2	dppF Dipeptide transport protein	dppF	15	15	15	15	15	1.18	1.25	1.3	1.15	1.22
Q9L6Q3	hemD Uroporphyrinogen-III synthase	hemD	15	15	15	15	15	1.37	1.27	1.08	1.16	1.22
Q8ZN89	ligA DNA ligase	ligA	15	15	15	8.33	13.33	1.28	1.35	1.06	1.18	1.22
Q8ZP02	manZ Mannose-specific enzyme IID	manZ	15	15	15	15	15	1.32	1.33	1.14	1.09	1.22
Q8ZJY6	yjiA Putative cobalamin synthesis protein	yjiA	15	15	15	7.14	13.04	1.27	1.33	1.15	1.12	1.22
Q8ZPZ6	purB Adenylosuccinate lyase	purB	15	15	10	12.5	13.13	1.28	1.45	1.04	1.1	1.22
Q7CQR6	msyB Acidic protein suppresses mutants lacking function	msyB	15	15	15	15	15	1.15	0.97	1.52	1.23	1.22
P26393	rmlA Glucose-1-phosphate thymidylyltransferase	rmlA	15	15	15	15	15	1.32	1.39	1.11	1.05	1.22
Q7CQG2	yciK Putative oxoacyl-(Acyl carrier protein) reductase	yciK	15	15	15	15	15	1.32	1.32	1.09	1.15	1.22
Q8ZK07	yjhP Putative SAM-dependent methyltransferase	yjhP	15	15	15	15	15	1.37	1.28	1.16	1.05	1.22
P66030	ribA GTP cyclohydrolase-2	ribA	15	15	15	15	15	1.39	1.35	1.14	0.99	1.22
P0A1P4	rfbJ CDP-abequose synthase	rfbJ	15	15	15	15	15	1.3	1.28	1.22	1.06	1.22
Q8ZLS1	kdsD Arabinose 5-phosphate isomerase KdsD	kdsD	15	15	15	15	15	1.33	1.27	1.18	1.09	1.22
Q8ZMM2	gabD NADP-dependent succinate-semialdehyde dehydrogenas	gabD	15	15	15	15	15	1.22	1.43	1.15	1.06	1.22
Q8ZJY5	yjiY Putative carbon starvation protein	yjiY	15	15	15	15	15	1.39	1.03	1.19	1.25	1.22
Q7CQY5	nagD Putative phosphatase in N-acetylglucosamine metabo	nagD	15	15	15	15	15	1.37	1.27	1.14	1.09	1.21
Q9L6Q8	wecF TDP-N-acetylfucosamine:lipid II N-acetylfucosaminy	wecF	15	15	15	15	15	1.41	1.18	1.16	1.11	1.21
Q8ZRM6	yafC Putative LysR family transcriptional regulator	yafC	15	15	15	11.11	14.03	1.33	1.41	1.05	1.06	1.21
P0A2I5	parE DNA topoisomerase 4 subunit B	parE	15	15	15	15	15	1.23	1.25	1.25	1.12	1.21
P0A281	pth Peptidyl-tRNA hydrolase	pth	15	15	15	12.5	14.38	1.25	1.28	1.18	1.15	1.21
Q8ZLV7	garD Galactarate dehydratase (L-threo-forming)	garD	15	15	7.69	15	13.17	1.25	1.33	1.16	1.11	1.21
P36557	basS Sensor protein BasS	basS	15	15	15	15	15	1.35	1.35	1.06	1.09	1.21
Q8ZQ05	ndh Respiratory NADH dehydrogenase 2	ndh	15	15	15	15	15	1.23	1.39	1.16	1.06	1.21
Q8ZLI7	nfuA Fe/S biogenesis protein NfuA	nfuA	15	15	15	15	15	1.27	1.32	1.19	1.08	1.21
P0AA28	trxA Thioredoxin 1	trxA	15	15	15	15	15	1.32	1.2	1.25	1.08	1.21
Q8ZNV2	aspS Aspartate--tRNA ligase	aspS	15	15	15	15	15	1.35	1.41	1.05	1.03	1.21
P26464	dnaN Beta sliding clamp	dnaN	15	15	15	15	15	1.32	1.43	1.1	1	1.21
Q8ZK33	arcA Arginine deiminase	arcA	15	15	15	15	15	1.32	1.25	1.19	1.09	1.21
Q8ZLS7	rlmE Ribosomal RNA large subunit methyltransferase E	rlmE	15	15	15	15	15	1.25	1.27	1.14	1.19	1.21
Q05591	cbiJ Cobalt-precorrin-6A reductase	cbiJ	15	15	15	15	15	1.39	1.27	1.12	1.06	1.21
Q8ZQX9	nagC Transcriptional repressor of nag (N-acetylglucosam	nagC	15	15	15	15	15	1.35	1.33	1.14	1.02	1.21
Q8ZPW3	yeaH UPF0229 protein YeaH	yeaH	15	15	15	15	15	1.18	1.28	1.22	1.16	1.21
Q8ZK15	STM4492 Putative cytoplasmic protein	STM4492	15	15	15	15	15	1.3	1.25	1.2	1.09	1.21
Q8ZNC0	folC Dihydrofolate synthase/folylpolyglutamate synthase	folC	15	15	15	15	15	1.35	1.3	1.14	1.05	1.21
Q8ZN59	guaB Inosine-5-monophosphate dehydrogenase	guaB	15	15	15	15	15	1.43	1.28	1.05	1.08	1.21
P65559	yfcD Uncharacterized Nudix hydrolase YfcD	yfcD	15	15	15	15	15	1.33	1.45	1.11	0.94	1.21
Q8ZRP3	dxr 1-deoxy-D-xylulose 5-phosphate reductoisomerase	dxr	15	15	15	15	15	1.35	1.32	1.15	1.02	1.21
Q8ZRU4	murD UDP-N-acetylmuramoylalanine--D-glutamate ligase	murD	15	15	15	15	15	1.22	1.22	1.22	1.18	1.21
Q7CQ56	menB 1,4-dihydroxy-2-naphthoyl-CoA synthase	menB	15	15	15	15	15	1.49	1.32	1.06	0.96	1.21
Q8ZQX1	fldA Flavodoxin 1	fldA	15	15	15	15	15	1.02	0.99	1.35	1.47	1.21
Q8ZLX8	aer Aerotaxis sensor receptor	aer	15	15	15	7.14	13.04	1.3	1.37	1.11	1.05	1.21
Q8ZLQ2	yhcB Putative periplasmic protein	yhcB	7.14	12.5	5	8.33	8.24	1.39	1.3	1.12	1.02	1.21
P0A2K7	galF UTP--glucose-1-phosphate uridylyltransferase	galF	15	15	15	15	15	1.25	1.32	1.19	1.08	1.21
Q8ZRU3	murG UDP-N-acetylglucosamine--N-acetylmuramyl-(pentapep	murG	15	15	15	15	15	1.35	1.25	1.05	1.18	1.21
Q8ZRY7	rihC Non-specific ribonucleoside hydrolase RihC	rihC	10	15	12.5	6.25	10.94	1.45	1.41	1.01	0.96	1.21
Q8ZLS3	yrbF Putative ABC superfamily transport protein	yrbF	15	15	15	15	15	1.37	1.11	1.28	1.06	1.21
Q8ZK87	ulaD 3-keto-L-gulonate-6-phosphate decarboxylase UlaD	ulaD	7.14	15	12.5	15	12.41	1.15	1.39	1.12	1.16	1.21
Q8ZP54	rnb Exoribonuclease 2	rnb	15	15	15	15	15	1.32	1.28	1.16	1.06	1.21
Q8ZPJ3	speG Spermidine N1-acetyltransferase	speG	9.09	15	15	15	13.52	1.32	1.45	1.11	0.94	1.2
P0CL50	otsB Trehalose-phosphate phosphatase	otsB	15	15	6.25	15	12.81	1.3	1.39	1.02	1.11	1.2
Q8ZQ17	rne Ribonuclease E	rne	15	15	15	15	15	1.19	1.28	1.28	1.06	1.2
Q8ZLL2	yheS Putative ATPase component of ABC transporter	yheS	15	15	15	15	15	1.2	1.39	1.14	1.09	1.2
Q9RCI2	miaB tRNA-2-methylthio-N(6)-dimethylallyladenosine synt	miaB	15	15	15	15	15	1.39	1.33	1.06	1.03	1.2
P19816	rfaI Lipopolysaccharide 1,3-galactosyltransferase	rfaI	6.67	15	15	15	12.92	1.25	1.41	1.16	0.99	1.2
P37427	nrdB Ribonucleoside-diphosphate reductase 1 subunit bet	nrdB	10	15	5.56	11.11	10.42	1.35	1.28	1.06	1.11	1.2
Q8ZLN1	aroE Shikimate dehydrogenase (NADP(+))	aroE	15	15	15	15	15	1.27	1.25	1.2	1.09	1.2
Q9L6R5	wecB UDP-N-acetylglucosamine 2-epimerase	wecB	15	15	15	15	15	1.22	1.27	1.23	1.09	1.2
Q8ZLW2	tdcE Pyruvate formate-lyase 4	tdcE	15	15	15	15	15	1.18	1.32	1.19	1.12	1.2
Q8ZKU8	rdoA Serine/threonine protein kinase RdoA	rdoA	15	15	12.5	15	14.38	1.33	1.39	1.05	1.03	1.2
Q8ZMA9	thyA Thymidylate synthase	thyA	15	15	15	15	15	1.3	1.28	1.11	1.11	1.2
Q8ZL08	dsdA D-serine dehydratase	dsdA	15	15	15	15	15	1.33	1.3	1.19	0.98	1.2
Q8ZNC9	yfcG Putative glutathione S-transferase	yfcG	15	15	15	15	15	1.69	1.35	0.93	0.82	1.2
Q8ZRB9	lon Lon protease	lon	15	15	15	15	15	1.23	1.25	1.2	1.11	1.2
P67408	udk Uridine kinase	udk	15	15	15	15	15	1.3	1.25	1.09	1.16	1.2
P0A251	ahpC Alkyl hydroperoxide reductase C	ahpC	15	15	15	15	15	1.23	1.25	1.25	1.06	1.2
Q8ZKS8	fdoG Formate dehydrogenase	fdoG	15	15	15	15	15	1.28	1.32	1.06	1.14	1.2
Q8ZMM1	gabT 4-aminobutyrate aminotransferase	gabT	15	15	15	15	15	1.37	1.25	1.14	1.04	1.2
Q8ZP51	rluB Ribosomal large subunit pseudouridine synthase B	rluB	15	15	12.5	15	14.38	1.3	1.33	1.12	1.04	1.2
Q8ZNW2	zwf Glucose-6-phosphate 1-dehydrogenase	zwf	15	15	15	15	15	1.35	1.32	1.1	1.03	1.2
Q8ZNR3	sopA E3 ubiquitin-protein ligase SopA	sopA	15	15	15	15	15	1.25	1.27	1.2	1.08	1.2
Q8ZL41	spoT (P)ppGpp synthetase II	spoT	15	15	15	15	15	1.28	1.32	1.09	1.11	1.2
Q8ZQD6	cydD Cytochrome-related transporter	cydD	12.5	15	15	15	14.38	1.33	1.35	1.11	1	1.2
Q8ZNE6	STM2314 Putative chemotaxis signal transduction protein	STM2314	15	15	15	15	15	1.28	1.35	1.08	1.09	1.2
Q8ZRN5	tilS tRNA(Ile)-lysidine synthase	tilS	15	12.5	15	15	14.38	1.25	1.37	1.2	0.97	1.2
Q7CPF5	rbsK Ribokinase	rbsK	15	15	15	15	15	1.41	1.45	1.22	1.08	1.29
P0A1Q4	dnaB Replicative DNA helicase	dnaB	15	5	15	15	12.5	1.25	1.41	1.02	1.11	1.2
P0A2E3	rpoD RNA polymerase sigma factor RpoD	rpoD	15	15	15	15	15	1.25	1.35	1.09	1.1	1.2
Q8ZL70	selB Selenocysteinyl-tRNA-specific translation factor	selB	15	15	15	15	15	1.33	1.33	1.1	1.02	1.2
Q05601	cbiC Cobalt-precorrin-8 methylmutase	cbiC	15	15	15	15	15	1.14	1.28	1.18	1.19	1.2
P0DM78	phoP Virulence transcriptional regulatory protein PhoP	phoP	10	9.09	15	12.5	11.65	1.23	1.22	1.11	1.22	1.2
P66974	trmJ tRNA (cytidine/uridine-2-O-)-methyltransferase Tr	trmJ	15	15	15	15	15	1.33	1.3	1.09	1.06	1.2
Q8ZKW6	mnmG tRNA uridine 5-carboxymethylaminomethyl modificati	mnmG	12.5	11.11	15	15	13.4	1.25	1.33	1.11	1.09	1.2
O52765	hisS Histidine--tRNA ligase	hisS	15	15	15	15	15	1.28	1.3	1.14	1.06	1.2
Q7CQM5	ssrB Secretion system regulator: transcriptonal activat	ssrB	15	15	15	15	15	1.19	1.45	1.05	1.09	1.19
P69066	sicA Chaperone protein SicA	sicA	15	15	15	15	15	1.33	1.32	1.1	1.03	1.19
P74873	sptP Secreted effector protein SptP	sptP	15	15	15	12.5	14.38	1.59	1.43	0.89	0.87	1.19
P0A293	prmB 50S ribosomal protein L3 glutamine methyltransfera	prmB	15	15	15	15	15	1.35	1.19	1.15	1.09	1.19
Q8ZJY8	hsdR Endonuclease R	hsdR	15	15	15	15	15	1.22	1.3	1.14	1.12	1.19
P26392	rfbD dTDP-4-dehydrorhamnose reductase	rfbD	15	15	15	12.5	14.38	1.33	1.28	1.1	1.06	1.19
P58671	ispG 4-hydroxy-3-methylbut-2-en-1-yl diphosphate syntha	ispG	15	15	15	15	15	1.3	1.32	1.1	1.06	1.19
O54296	rpsK 30S ribosomal protein S11	rpsK	15	15	15	15	15	1.39	1.28	1.06	1.04	1.19
P16657	fabI Enoyl-[acyl-carrier-protein] reductase [NADH] FabI	fabI	15	15	15	15	15	1.22	1.28	1.16	1.11	1.19
Q8ZQF0	poxB Pyruvate dehydrogenase/oxidase FAD and thiamine PP	poxB	12.5	10	11.11	15	12.15	1.18	1.45	1	1.15	1.19
Q7CPR7	mug G/U mismatch-specific DNA glycosylase	mug	15	15	15	15	15	1.28	1.39	1.12	0.98	1.19
P65921	pyrG CTP synthase	pyrG	15	15	15	15	15	1.25	1.25	1.16	1.11	1.19
P37426	nrdA Ribonucleoside-diphosphate reductase 1 subunit alp	nrdA	15	15	15	15	15	1.32	1.32	1.11	1.03	1.19
P0A1P2	gpsA Glycerol-3-phosphate dehydrogenase [NAD(P)+]	gpsA	15	12.5	15	15	14.38	1.35	1.06	1.23	1.12	1.19
Q7CPL2	yheO Putative regulator	yheO	15	15	15	15	15	1.27	1.28	1.2	1.02	1.19
P0A210	fliZ Protein FliZ	fliZ	15	15	15	15	15	1.2	1.09	1.37	1.11	1.19
Q8ZLJ2	greB Transcription elongation factor GreB	greB	15	15	15	15	15	1.54	1.15	1.02	1.06	1.19
Q8ZLN0	tsaC Threonylcarbamoyl-AMP synthase	tsaC	15	15	15	15	15	1.3	1.28	1.14	1.05	1.19
Q8ZQ06	nagZ Beta-hexosaminidase	nagZ	15	15	15	15	15	1.25	1.41	1.11	1	1.19
P14846	carB Carbamoyl-phosphate synthase large chain	carB	15	15	15	15	15	1.37	1.33	1.06	1	1.19
Q8ZL84	yiaJ IclR family transcriptional repressor	yiaJ	15	15	15	15	15	1.23	1.27	1.23	1.03	1.19
P0A2P0	rhlB ATP-dependent RNA helicase RhlB	rhlB	15	15	15	15	15	1.25	1.32	1.11	1.09	1.19
Q8ZRJ8	yafV Putative amidohydrolase	yafV	11.11	15	15	15	14.03	1.19	1.41	1.11	1.05	1.19
Q8ZQD7	cydC Cytochrome-related transporter	cydC	15	15	15	7.14	13.04	1.35	1.33	1.09	0.99	1.19
O30917	sigE Chaperone protein SigE	sigE	15	15	15	15	15	1.39	1.12	1.1	1.15	1.19
Q8ZKE5	phnB Putative cytoplasmic protein	phnB	15	15	12.5	15	14.38	1.43	1.3	1.05	0.98	1.19
P55912	prpE Propionate--CoA ligase	prpE	15	15	15	15	15	1.23	1.3	1.16	1.06	1.19
O52623	sopE Guanine nucleotide exchange factor SopE	sopE	15	15	15	15	15	1.27	1.28	1.14	1.08	1.19
Q8ZMI7	hypB Hydrogenase-3 accessory protein	hypB	15	15	15	15	15	1.28	1.22	1.2	1.05	1.19
Q8ZRJ7	fadE Acyl-coenzyme A dehydrogenase	fadE	15	15	15	15	15	1.3	1.41	1.1	0.95	1.19
Q8ZRD2	yajO Putative oxidoreductase / K + channel protein	yajO	15	15	15	15	15	1.3	1.22	1.14	1.1	1.19
P0CL06	otsA Trehalose-6-phosphate synthase	otsA	15	15	15	15	15	1.23	1.28	1.12	1.11	1.19
Q8ZPW2	yeaG Putative Ser protein kinase	yeaG	15	15	15	15	15	1.28	1.32	1.11	1.04	1.19
Q8ZNI7	STM2238 Putative phage protein	STM2238	15	7.69	15	15	13.17	1.33	1.16	1.19	1.06	1.19
P0A1F0	ddlA D-alanine--D-alanine ligase A	ddlA	15	15	15	15	15	1.23	1.19	1.25	1.08	1.19
P60084	syd Protein Syd	syd	15	15	15	6.67	12.92	1.43	1.12	1.09	1.11	1.19
Q8ZQD3	dmsA Anaerobic dimethyl sulfoxide reductase, subunit A	dmsA	15	15	15	15	15	1.22	1.28	1.14	1.11	1.19
P60726	rplD 50S ribosomal protein L4	rplD	5.26	6.67	5.26	7.14	6.08	1.11	1.2	1.15	1.28	1.19
P40676	slyA Transcriptional regulator SlyA	slyA	15	15	15	15	15	1.25	1.22	1.19	1.09	1.19
Q8ZKP4	glpX Fructose-1,6-bisphosphatase	glpX	15	15	15	15	15	1.22	1.27	1.22	1.04	1.19
Q8ZKI0	ubiC Chorismate pyruvate-lyase	ubiC	15	15	15	15	15	1.33	1.27	1.14	1.01	1.19
Q8ZK65	STM4417 Putative transcriptional regulator	STM4417	10	15	15	15	13.75	1.19	1.3	1.19	1.06	1.19
Q8ZNH4	eco Ecotin	eco	15	15	15	15	15	1.32	1.32	1.11	1	1.19
Q8ZNB9	truA tRNA pseudouridine synthase A	truA	15	15	15	12.5	14.38	1.25	1.2	1.16	1.12	1.19
Q8ZPV5	selD Selenide, water dikinase	selD	15	15	15	15	15	1.25	1.27	1.23	0.99	1.19
P0A2P8	cra Catabolite repressor/activator	cra	15	15	15	15	15	1.23	1.39	1.06	1.05	1.18
Q8ZQE0	STM0950 Homolog of slsA in STM	STM0950	15	15	15	12.5	14.38	1.3	1.25	1.15	1.04	1.18
Q7CR11	ybbO Putative oxidoreductase	ybbO	15	15	15	15	15	1.28	1.32	1.08	1.06	1.18
Q8ZNL8	preT NAD-dependent dihydropyrimidine dehydrogenase subu	preT	15	15	15	15	15	1.23	1.25	1.16	1.09	1.18
Q8ZP57	steC Secreted effector kinase SteC	steC	15	15	15	15	15	1.19	1.18	1.18	1.19	1.18
P58580	gshB Glutathione synthetase	gshB	15	15	15	15	15	1.28	1.3	1.11	1.04	1.18
Q7CP75	yjiE Putative LysR family transcriptional regulator	yjiE	15	15	15	15	15	1.3	1.23	1.14	1.06	1.18
Q8ZL47	dfp Coenzyme A biosynthesis bifunctional protein CoaBC	dfp	15	15	15	15	15	1.35	1.35	1.09	0.94	1.18
P0A2M5	upp Uracil phosphoribosyltransferase	upp	15	15	15	15	15	1.27	1.27	1.14	1.06	1.18
Q8ZL90	xylA Xylose isomerase	xylA	15	15	15	15	15	1.37	1.16	1.08	1.12	1.18
P65973	rdgC Recombination-associated protein RdgC	rdgC	15	15	15	15	15	1.22	1.19	1.23	1.09	1.18
Q8ZK18	STM4489 Putative superfamily I DNA helicases	STM4489	15	15	15	15	15	1.33	1.15	1.1	1.15	1.18
P0A1S6	yaeQ Uncharacterized protein YaeQ	yaeQ	12.5	15	15	15	14.38	1.25	1.43	1.01	1.04	1.18
Q8ZLG7	glgP Alpha-1,4 glucan phosphorylase	glgP	15	15	15	15	15	1.25	1.35	1.09	1.04	1.18
Q7CP84	pmbA Putative peptide maturation protein	pmbA	15	15	15	15	15	1.28	1.28	1.04	1.12	1.18
Q8ZQB9	STM0989 MukF protein (Killing factor KicB)	STM0989	15	15	15	15	15	1.19	1.16	1.25	1.12	1.18
P63603	aroL Shikimate kinase 2	aroL	15	15	15	12.5	14.38	1.28	1.28	1.06	1.1	1.18
Q8ZLQ5	sspA Stringent starvation protein A	sspA	15	15	15	15	15	1.3	1.27	1.08	1.09	1.18
P0A1Y6	nuoC NADH-quinone oxidoreductase subunit C/D	nuoC	15	15	15	15	15	1.32	1.39	1.02	1	1.18
Q8ZLS5	obg GTPase Obg	obg	15	15	15	15	15	1.35	1.35	1	1.02	1.18
Q8ZN32	yfhA Putative transcriptional regulator of two-componen	yfhA	5.88	12.5	15	15	12.1	1.28	1.39	1.04	1.01	1.18
Q9L9J3	STMF1.17 Putative cytoplasmic protein	STMF1.17	15	15	10	7.69	11.92	1.32	1.2	1.15	1.05	1.18
P0A1Z0	cadA Inducible lysine decarboxylase	cadA	10	12.5	15	11.11	12.15	1.19	1.32	1.2	1.01	1.18
Q7CPV9	gcvA Regulator of gcv operon	gcvA	15	15	15	15	15	1.27	1.22	1.11	1.12	1.18
P0A1A3	alr Alanine racemase, biosynthetic	alr	15	12.5	15	10	13.13	1.23	1.39	1.06	1.03	1.18
Q7CQN4	lpp1 Major outer membrane lipoprotein 1	lpp1	10	10	9.09	9.09	9.55	1.25	1.25	1.18	1.04	1.18
Q7CPY7	yqaB Putative phosphoglucomutase	yqaB	8.33	12.5	15	15	12.71	1.22	1.25	1.1	1.15	1.18
Q7CP66	deoA Thymidine phosphorylase	deoA	15	15	15	15	15	1.2	1.32	1.18	1.02	1.18
Q7CPK4	gntK Gluconokinase	gntK	15	15	15	15	15	1.12	1.39	1.04	1.16	1.18
P35891	dnaA Chromosomal replication initiator protein DnaA	dnaA	12.5	15	15	15	14.38	1.28	1.23	1.12	1.08	1.18
Q8ZL40	spoU tRNA (guanosine(18)-2-O)-methyltransferase	spoU	15	15	15	15	15	1.11	1.2	1.25	1.15	1.18
Q8ZPL9	add Adenosine deaminase	add	15	15	15	15	15	1.25	1.33	1.11	1.02	1.18
Q8ZLG6	glgX Glycogen debranching enzyme	glgX	15	15	15	15	15	1.23	1.37	1.1	1.01	1.18
P37421	rfaF ADP-heptose--LPS heptosyltransferase 2	rfaF	15	8.33	15	15	13.33	1.18	1.27	1.25	1.02	1.18
P17328	proV Glycine betaine/proline betaine transport system A	proV	15	15	7.14	6.67	10.95	1.25	1.33	1.06	1.06	1.18
P40733	dgt Deoxyguanosinetriphosphate triphosphohydrolase	dgt	6.25	15	5	15	10.31	1.39	1.32	1.05	0.95	1.18
P0A2I3	gyrB DNA gyrase subunit B	gyrB	15	15	15	15	15	1.28	1.3	1.09	1.04	1.18
Q8ZPU8	astE Succinylglutamate desuccinylase	astE	15	15	15	15	15	1.39	1.32	1.09	0.92	1.18
Q8ZKN5	metB Cystathionine gamma-synthase	metB	15	15	5	15	12.5	1.33	1.37	1.09	0.92	1.18
Q8ZLX3	ygjR Putative dehydrogenase	ygjR	15	15	15	15	15	1.3	1.22	1.14	1.05	1.18
Q8ZN40	iscS Cysteine desulfurase IscS	iscS	15	15	15	15	15	1.27	1.25	1.15	1.04	1.18
Q8ZK16	STM4491 Putative ATP-dependent Lon protease	STM4491	15	15	15	15	15	1.32	1.32	1	1.08	1.18
P26403	rfbN O antigen biosynthesis rhamnosyltransferase RfbN	rfbN	15	15	15	11.11	14.03	1.25	1.19	1.19	1.08	1.18
Q7CQZ4	ybeF Putative LysR family transcriptional regulator	ybeF	15	15	15	15	15	1.19	1.23	1.19	1.09	1.18
Q8ZNF7	STM2293 CinA-like protein	STM2293	15	15	15	15	15	1.25	1.32	1.16	0.97	1.17
Q8ZMD0	sdaB L-serine dehydratase	sdaB	12.5	15	15	15	14.38	1.22	1.27	1.15	1.06	1.17
P0A2C3	rph Ribonuclease PH	rph	15	15	15	15	15	1.16	1.35	1.16	1.02	1.17
Q8ZM23	uxaC Uronate isomerase	uxaC	7.14	7.14	8.33	9.09	7.93	1.28	1.32	1	1.1	1.17
Q8ZQ74	STM1060 Putative iron-sulfur protein	STM1060	15	12.5	15	15	14.38	1.37	1.22	1.08	1.03	1.17
Q8ZKL9	argE Acetylornithine deacetylase	argE	15	15	15	15	15	1.23	1.04	1.28	1.14	1.17
Q8ZKP2	glpF Glycerol diffusion MIP channel	glpF	15	15	15	15	15	1.19	0.97	1.23	1.3	1.17
Q935S7	mukB Chromosome partition protein MukB	mukB	15	15	15	15	15	1.22	1.33	1.08	1.06	1.17
P20506	ilvA L-Threonine dehydratase biosynthetic IlvA	ilvA	15	12.5	15	15	14.38	1.28	1.27	1.12	1.02	1.17
P40813	hsdM Type I restriction enzyme StySJI M protein	hsdM	15	15	15	15	15	1.22	1.22	1.18	1.08	1.17
Q8ZKC9	STM4315 Putative AraC-type DNA-binding domain-containing p	STM4315	15	15	15	15	15	1.37	1.22	1.19	0.91	1.17
Q8ZJU8	gpmB Probable phosphoglycerate mutase GpmB	gpmB	15	15	15	12.5	14.38	1.28	1.25	1.18	0.98	1.17
Q9ZFV4	eutT Ethanolamine utilization cobalamin adenosyltransfe	eutT	15	5.88	15	15	12.72	1.19	1.22	1.19	1.09	1.17
Q7CPP9	glmM Phosphoglucosamine mutase	glmM	15	15	15	15	15	1.22	1.22	1.14	1.11	1.17
P74861	tyrB Aromatic-amino-acid aminotransferase	tyrB	15	15	15	15	15	1.27	1.33	1.09	1	1.17
Q8ZRQ7	gluQ Glutamyl-Q tRNA(Asp) synthetase	gluQ	15	15	15	15	15	1.2	1.28	1.09	1.11	1.17
Q8ZPV1	astA Arginine N-succinyltransferase	astA	7.69	5.56	12.5	7.14	8.22	1.16	1.19	1.22	1.11	1.17
Q8ZRR0	panB 3-methyl-2-oxobutanoate hydroxymethyltransferase	panB	10	9.09	15	15	12.27	1.28	1.3	1.11	0.99	1.17
P0A7L6	rplT 50S ribosomal protein L20	rplT	6.25	8.33	6.67	9.09	7.59	0.79	1.22	1.45	1.22	1.17
Q56016	rsmA Ribosomal RNA small subunit methyltransferase A	rsmA	15	8.33	15	15	13.33	1.09	1.27	1.2	1.12	1.17
A9MK61	SARI_00697 S-formylglutathione hydrolase	SARI_00697	15	15	15	15	15	1.25	1.19	1.18	1.06	1.17
B5EYP4	fghA S-formylglutathione hydrolase	fghA	15	15	15	15	15	1.25	1.19	1.18	1.06	1.17
B5RC33	yeiG S-formylglutathione hydrolase	yeiG	15	15	15	15	15	1.25	1.19	1.18	1.06	1.17
C0Q0U6	yeiG S-formylglutathione hydrolase	yeiG	15	15	15	15	15	1.25	1.19	1.18	1.06	1.17
Q8ZNL5	yeiG S-formylglutathione hydrolase	yeiG	15	15	15	15	15	1.25	1.19	1.18	1.06	1.17
Q8ZRS0	yadF Carbonic anhydrase	yadF	6.67	7.14	11.11	15	9.98	1.15	1.2	1.08	1.25	1.17
Q7CPM4	cafA RNase G	cafA	15	15	15	15	15	1.28	1.33	1.11	0.95	1.17
Q7CQL0	cfa Cyclopropane fatty acyl phospholipid synthase	cfa	15	15	15	15	15	1.22	1.35	1.09	1.02	1.17
P40731	tsaD tRNA N6-adenosine threonylcarbamoyltransferase	tsaD	6.67	15	15	15	12.92	1.28	1.2	1.15	1.04	1.17
H9L451	bamB Outer membrane protein assembly factor BamB	bamB	15	15	12.5	15	14.38	0.94	1.32	1.14	1.28	1.17
Q8ZNW9	ptrB Protease II	ptrB	15	15	15	15	15	1.39	1.32	0.97	1	1.17
Q8ZNN2	btsR Transcriptional regulatory protein BtsR	btsR	10	15	15	11.11	12.78	1.41	1.19	1.12	0.95	1.17
Q8ZL68	yibF Putative glutathione S-transferase	yibF	15	15	15	15	15	1.22	1.32	1.09	1.05	1.17
Q8ZRD4	ribD Riboflavin biosynthesis protein RibD	ribD	15	15	15	15	15	1.19	1.27	1.18	1.04	1.17
Q8ZLC8	treF Cytoplasmic trehalase	treF	15	15	10	15	13.75	1.19	1.2	1.19	1.09	1.17
P37417	murB UDP-N-acetylenolpyruvoylglucosamine reductase	murB	15	15	15	5.88	12.72	1.39	1.14	1.14	1.01	1.17
P37586	metH Methionine synthase	metH	15	15	15	15	15	1.32	1.23	1.09	1.03	1.17
Q8ZLB5	bcsE Cyclic di-GMP binding protein BcsE	bcsE	15	15	15	15	15	1.16	1.09	1.28	1.14	1.17
Q8ZRU7	murE UDP-N-acetylmuramoyl-L-alanyl-D-glutamate--2,6-dia	murE	15	15	15	15	15	1.35	1.25	1.11	0.95	1.17
Q7CPZ8	tyrA T-protein	tyrA	15	15	15	15	15	1.39	1.28	1.01	0.98	1.17
Q8ZLH4	glpD Glycerol-3-phosphate dehydrogenase	glpD	15	15	15	15	15	1.25	1.28	1.09	1.04	1.17
P0A1U4	yjaG Uncharacterized protein YjaG	yjaG	15	15	15	15	15	1.39	1.23	1.08	0.96	1.17
P0A2D7	tyrR Transcriptional regulatory protein TyrR	tyrR	15	15	15	15	15	1.16	1.2	1.2	1.09	1.16
O85139	fabH 3-oxoacyl-[acyl-carrier-protein] synthase 3	fabH	6.25	15	15	15	12.81	1.15	1.12	1.25	1.14	1.16
Q8ZR02	dacA D-alanyl-D-alanine carboxypeptidase, penicillin-bi	dacA	5	6.67	9.09	15	8.94	1.23	1.52	0.91	1	1.16
P37450	pduC Propanediol dehydratase large subunit	pduC	15	15	15	15	15	1.23	1.28	1.11	1.03	1.16
Q8ZS18	thrC Threonine synthase	thrC	15	15	12.5	15	14.38	1.23	1.25	1.09	1.09	1.16
Q7CQR8	ycdY Putative oxidoreductase component	ycdY	15	15	15	15	15	1.22	1.19	1.11	1.14	1.16
Q8ZRD1	dxs 1-deoxy-D-xylulose-5-phosphate synthase	dxs	15	15	15	15	15	1.28	1.22	1.12	1.03	1.16
P65889	purC Phosphoribosylaminoimidazole-succinocarboxamide sy	purC	15	15	15	15	15	1.28	1.32	1.12	0.93	1.16
P68738	nfi Endonuclease V	nfi	15	15	15	15	15	1.16	1.27	1.16	1.06	1.16
Q8ZLC7	STM3604 Putative inner membrane protein	STM3604	10	8.33	15	15	12.08	1.37	1.28	1.03	0.97	1.16
Q8ZR17	ybdR Putative dehydrogenase	ybdR	15	15	15	15	15	1.2	1.09	1.28	1.08	1.16
P27236	dcp Dipeptidyl carboxypeptidase	dcp	15	15	15	15	15	1.33	1.39	1	0.93	1.16
Q8ZM72	pepP Proline aminopeptidase P II	pepP	15	15	15	15	15	1.16	1.25	1.12	1.11	1.16
P63365	pstB Phosphate import ATP-binding protein PstB	pstB	15	15	15	15	15	1.11	1.23	1.11	1.19	1.16
Q8ZPM0	ydgJ Putative oxidoreductase	ydgJ	15	15	15	15	15	1.23	1.28	1.1	1.03	1.16
Q05593	cbiL Cobalt-precorrin-2 C(20)-methyltransferase	cbiL	15	12.5	15	15	14.38	1.27	1.25	1.09	1.04	1.16
P26470	waaK Lipopolysaccharide 1,2-N-acetylglucosaminetransfer	waaK	15	15	15	15	15	1.23	1.15	1.25	1.01	1.16
Q8ZN58	xseA Exodeoxyribonuclease 7 large subunit	xseA	15	15	12.5	15	14.38	1.33	1.25	1.1	0.96	1.16
Q8ZJU9	yjjK Putative transport protein	yjjK	15	15	15	15	15	1.18	1.22	1.11	1.14	1.16
Q8ZPW0	STM1288 Putative aldehyde reductase	STM1288	15	15	15	15	15	1.28	1.22	1.14	1	1.16
Q8ZPL3	rstA Response regulator in two-component regulatory sys	rstA	15	7.14	15	15	13.04	1.09	1.22	1.22	1.11	1.16
P0A2K5	ubiE Ubiquinone/menaquinone biosynthesis C-methyltransf	ubiE	15	15	15	15	15	1.18	1.2	1.19	1.06	1.16
P40699	spaO Surface presentation of antigens protein SpaO	spaO	15	15	15	15	15	1.2	1.25	1.14	1.04	1.16
Q8ZLX5	rlmG Ribosomal RNA large subunit methyltransferase G	rlmG	15	15	15	15	15	1.22	1.23	1.14	1.04	1.16
P41793	eutE Ethanolamine utilization protein EutE	eutE	15	15	15	15	15	1.14	1.23	1.25	1.01	1.16
P0CL07	hemL Glutamate-1-semialdehyde 2,1-aminomutase	hemL	15	15	15	15	15	1.16	1.16	1.23	1.06	1.16
P67688	prmA Ribosomal protein L11 methyltransferase	prmA	10	6.67	15	15	11.67	1.2	1.16	1.23	1.02	1.16
Q8ZNK8	yeiE Putative LysR family transcriptional regulator	yeiE	15	15	15	11.11	14.03	1.25	1.27	1.05	1.05	1.16
P0A1E1	hemN Oxygen-independent coproporphyrinogen III oxidase	hemN	15	15	15	15	15	1.16	1.28	1.12	1.05	1.16
P05416	glgA Glycogen synthase	glgA	15	15	15	15	15	1.23	1.25	1.14	1	1.16
Q7CPR9	hldE Bifunctional protein HldE	hldE	15	15	15	15	15	1.3	1.27	1.06	0.99	1.15
P0A2C9	fabG 3-oxoacyl-[acyl-carrier-protein] reductase FabG	fabG	15	15	15	15	15	1.09	1.16	1.18	1.19	1.15
Q8ZN42	hscA Chaperone protein HscA	hscA	15	15	15	15	15	1.18	1.23	1.16	1.04	1.15
P66008	sthA Soluble pyridine nucleotide transhydrogenase	sthA	15	15	15	15	15	1.22	1.16	1.19	1.04	1.15
P65454	murA UDP-N-acetylglucosamine 1-carboxyvinyltransferase	murA	15	15	15	15	15	1.35	1.3	1.09	0.88	1.15
Q8ZQE6	ybjD Homology with RecF protein	ybjD	15	15	15	12.5	14.38	1.27	1.28	1.04	1.02	1.15
Q7CQJ2	STM1541 Putative gntR family regulatory protein	STM1541	15	15	15	15	15	1.23	1.23	1.09	1.05	1.15
Q8ZLJ1	yhgF Putative RNase R	yhgF	15	15	15	15	15	1.23	1.25	1.12	1	1.15
Q8ZRQ4	hrpB ATP-dependent helicase	hrpB	15	15	15	15	15	1.16	1.28	1.06	1.1	1.15
Q8ZP95	hrpA ATP-dependent helicase	hrpA	15	15	15	15	15	1.15	1.27	1.15	1.04	1.15
Q9XDM9	pduS Propanediol utilization protein	pduS	15	15	15	15	15	1.1	1.18	1.22	1.11	1.15
Q8ZQE3	clpA ATP-binding subunit of serine protease	clpA	15	15	15	15	15	1.18	1.22	1.1	1.11	1.15
Q8ZKD7	STM4305 Putative anaerobic dimethyl sulfoxide reductase, s	STM4305	15	6.67	15	15	12.92	1.22	1.22	1.16	1	1.15
Q8ZKQ0	lsrF 3-hydroxy-5-phosphonooxypentane-2,4-dione thiolase	lsrF	8.33	6.67	6.67	10	7.92	1.12	1.19	1.18	1.11	1.15
P37724	miaA tRNA dimethylallyltransferase	miaA	15	15	15	15	15	1.16	1.33	1.04	1.06	1.15
Q8ZRC0	clpX ATP-dependent Clp protease ATP-binding subunit Clp	clpX	15	15	15	15	15	1.19	1.22	1.05	1.14	1.15
P37416	birA Bifunctional ligase/repressor BirA	birA	8.33	10	15	15	12.08	1.32	1.08	1.18	1.03	1.15
P0A297	rplJ 50S ribosomal protein L10	rplJ	15	15	15	15	15	1.19	1.22	1.12	1.06	1.15
Q7CQ36	fabB 3-oxoacyl-[acyl-carrier-protein] synthase I	fabB	15	15	15	15	15	1.19	1.33	1.05	1.02	1.15
Q8ZP66	ycjG Putative chloromuconate cycloisomerase	ycjG	15	15	15	15	15	1.22	1.23	1.06	1.08	1.15
P0CL11	galR HTH-type transcriptional regulator galR	galR	5.88	15	15	15	12.72	1.28	1.14	1.09	1.09	1.15
Q8ZK01	uxuR Transcriptional repressor for uxu operon	uxuR	15	15	15	15	15	1.27	1.22	1.04	1.06	1.15
P30012	nadC Nicotinate-nucleotide pyrophosphorylase [carboxyla	nadC	15	15	10	15	13.75	1.22	1.19	1.19	0.99	1.15
Q8ZQQ2	slrP E3 ubiquitin-protein ligase SlrP	slrP	12.5	15	15	15	14.38	1.35	1.18	1.02	1.04	1.15
P40723	murI Glutamate racemase	murI	15	15	15	15	15	1.3	1.16	1.14	0.99	1.15
Q8ZNW5	purT Formate-dependent phosphoribosylglycinamide formyl	purT	15	15	15	10	13.75	1.23	1.23	1.09	1.03	1.15
P0A295	rho Transcription termination factor Rho	rho	8.33	12.5	11.11	15	11.74	1.11	1.27	1.11	1.1	1.15
P65977	recA Protein RecA	recA	15	15	15	15	15	1.22	1.25	1.08	1.04	1.15
Q8ZLW3	tdcG L-serine deaminase	tdcG	15	15	12.5	15	14.38	1.16	1.28	1.06	1.08	1.15
Q8ZRN7	ldcC Lysine decarboxylase 2, constitutive	ldcC	15	15	15	12.5	14.38	1.28	1.45	1.01	0.84	1.15
P37402	panE 2-dehydropantoate 2-reductase	panE	15	15	9.09	10	12.27	1.16	1.28	1.14	1	1.15
Q56121	prfC Peptide chain release factor 3	prfC	15	15	15	15	15	1.22	1.15	1.14	1.08	1.15
H9L4B2	uvrY Putative LuxR/UhpA family response regulator	uvrY	15	15	15	15	15	1.32	1.22	1.06	0.98	1.14
Q7CQW2	glnQ Glutamine high-affinity transporter	glnQ	15	12.5	15	15	14.38	1.11	1.22	1.14	1.11	1.14
Q8ZPP7	orf32 Putative hydrolase or acyltransferase	orf32	15	15	15	15	15	1.11	1.32	1.06	1.09	1.14
Q8ZQY0	asnB Asparagine synthetase B	asnB	15	15	15	15	15	1.22	1.2	1.16	0.99	1.14
Q7CPP7	rplU 50S ribosomal protein L21	rplU	7.14	7.69	7.14	6.67	7.16	0.89	1.08	1.39	1.22	1.14
P19817	rfaJ Lipopolysaccharide 1,2-glucosyltransferase	rfaJ	15	15	12.5	15	14.38	1.25	1.22	1.08	1.03	1.14
Q8ZNA7	fadJ Fatty acid oxidation complex subunit alpha	fadJ	15	15	15	15	15	1.19	1.22	1.12	1.04	1.14
P0A2M9	spvC MAPK phosphothreonine lyase	spvC	15	15	15	15	15	1.27	1.19	1.08	1.04	1.14
P24398	spvC MAPK phosphothreonine lyase	spvC	15	15	15	15	15	1.27	1.19	1.08	1.04	1.14
Q7CP94	vacB Ribonuclease R	vacB	15	15	15	15	15	1.18	1.28	1.04	1.06	1.14
Q8ZRU6	murF UDP-N-acetylmuramoyl-tripeptide--D-alanyl-D-alanin	murF	15	15	15	15	15	1.11	1.32	1.14	1	1.14
Q8ZPJ6	STM1499 Putative dimethyl sulphoxide reductase, chain A1	STM1499	15	15	10	15	13.75	1.19	1.22	1.11	1.04	1.14
P26973	parC DNA topoisomerase 4 subunit A	parC	15	12.5	12.5	15	13.75	1.11	1.35	1	1.1	1.14
P65774	nadK NAD kinase	nadK	15	15	15	8.33	13.33	1.22	1.18	1.09	1.08	1.14
Q8ZP87	dbpA ATP-dependent RNA helicase DbpA	dbpA	15	15	15	15	15	1.22	1.2	1.11	1.02	1.14
Q8ZME2	relA (P)ppGpp synthetase I	relA	15	15	15	15	15	1.09	1.19	1.19	1.09	1.14
Q8ZRT5	guaC GMP reductase	guaC	15	15	15	15	15	1.16	1.18	1.16	1.05	1.14
Q7CR62	proS Proline--tRNA ligase	proS	12.5	12.5	9.09	15	12.27	1.09	1.22	1.14	1.11	1.14
Q8ZNR5	pduO Propanediol utilization B12 related protein	pduO	15	15	15	15	15	1.28	1.08	1.2	0.99	1.14
Q8ZLX9	STM3216 Putative methyl-accepting chemotaxis protein	STM3216	15	15	15	15	15	1.16	1.28	1.09	1.02	1.14
P22038	trmA tRNA/tmRNA (uracil-C(5))-methyltransferase	trmA	15	7.14	15	15	13.04	1.25	1.19	1	1.11	1.14
Q7CPZ7	ffh Signal recognition particle protein	ffh	15	15	15	15	15	1.08	1.16	1.14	1.18	1.14
O30911	hslU ATP-dependent protease ATPase subunit HslU	hslU	15	15	15	15	15	1.15	1.19	1.1	1.11	1.14
Q7CP89	ytfL Putative hemolysin-related protein	ytfL	15	11.11	15	15	14.03	1.15	1.28	1.09	1.03	1.14
Q8ZP63	ycjX Putative ATPase	ycjX	6.25	15	7.14	15	10.85	1.05	1.16	1.23	1.1	1.14
P60659	speA Biosynthetic arginine decarboxylase	speA	15	15	15	15	15	1.14	1.23	1.06	1.11	1.14
Q8ZLI4	malP Alpha-1,4 glucan phosphorylase	malP	15	15	15	15	15	1.19	1.19	1.11	1.05	1.14
Q8ZNP3	STM2138 Putative cytoplasmic protein	STM2138	9.09	15	15	15	13.52	1.2	1.25	1.08	1.01	1.14
Q8ZR31	entB 2,3-dihydro-2,3-dihydroxybenzoate synthetase, isoc	entB	15	15	15	15	15	1.18	1.33	1.09	0.94	1.14
Q7CQ54	elaA Putative acyltransferase	elaA	15	15	15	15	15	1.27	1.28	0.99	1	1.13
Q8ZLM5	rsmB Ribosomal RNA small subunit methyltransferase B	rsmB	15	15	15	15	15	1.04	1.43	1.09	0.98	1.13
Q8ZMX7	srmB ATP-dependent RNA helicase SrmB	srmB	15	15	15	15	15	1.22	1.23	1.04	1.04	1.13
P37430	nusA Transcription termination/antitermination protein	nusA	15	15	15	15	15	1.16	1.18	1.09	1.11	1.13
Q8ZPQ4	sufB Putative ABC transporter	sufB	15	15	8.33	15	13.33	1.14	1.32	1.04	1.04	1.13
Q7CQA9	yeeZ Putative dehydratase	yeeZ	15	15	15	15	15	1.11	1.14	1.18	1.11	1.13
Q8ZQU1	sucA 2-oxoglutarate dehydrogenase decarboxylase compone	sucA	15	15	15	15	15	1.08	1.08	1.23	1.15	1.13
Q8ZND4	STM2341 Putative transketolase	STM2341	15	15	15	15	15	1.23	1.27	1.04	0.99	1.13
Q05592	cbiK Sirohydrochlorin cobaltochelatase	cbiK	8.33	15	15	15	13.33	1.28	1.28	1.04	0.93	1.13
Q7CQN8	STM1324 Putative cytoplasmic protein	STM1324	15	15	15	6.25	12.81	1.16	1.2	1.1	1.06	1.13
Q8ZMJ8	norR Anaerobic nitric oxide reductase transcription reg	norR	15	9.09	15	15	13.52	1.61	0.93	1.02	0.96	1.13
Q8ZLY0	yqjI Putative transcriptional regulator	yqjI	15	15	15	15	15	1.16	1.14	1.22	1.01	1.13
P08005	oppB Oligopeptide transport system permease protein Opp	oppB	15	8.33	15	15	13.33	1.22	1.39	1.09	0.83	1.13
Q8ZR57	STM0563 Putative transcriptional regulator (AraC/XylS fami	STM0563	12.5	15	15	15	14.38	1.32	1.14	1.08	1	1.13
Q8ZNC8	yfcH Putative sugar nucleotide epimerase	yfcH	15	15	15	15	15	1.16	1.23	1.06	1.06	1.13
Q8ZM73	ubiH 2-octaprenyl-6-methoxyphynol hydroxylase	ubiH	8.33	15	15	15	13.33	1.2	1.16	1.14	1.02	1.13
Q7CPJ6	ftsE Putative ATPase involved in cell division	ftsE	12.5	15	15	6.25	12.19	1.2	1.33	1.08	0.91	1.13
H9L449	rfaQ Lipopolysaccharide core biosynthesis protein	rfaQ	15	15	15	15	15	1.27	1.08	0.96	1.22	1.13
Q8ZM74	visC Putative monooxygenase	visC	15	15	15	15	15	1.2	1.16	1.12	1.03	1.13
P0A1A9	xthA Exodeoxyribonuclease III	xthA	15	15	15	15	15	1.2	1.16	1.11	1.04	1.13
P60656	speB Agmatinase	speB	15	15	15	15	15	1.11	1.22	1.08	1.11	1.13
B4T3P7	ycfP UPF0227 protein YcfP	ycfP	15	15	15	15	15	1.15	1.14	1.18	1.05	1.13
B4TFI5	ycfP UPF0227 protein YcfP	ycfP	15	15	15	15	15	1.15	1.14	1.18	1.05	1.13
B5F8E4	ycfP UPF0227 protein YcfP	ycfP	15	15	15	15	15	1.15	1.14	1.18	1.05	1.13
E8XEX8	ycfp UPF0227 protein YcfP	ycfp	15	15	15	15	15	1.15	1.14	1.18	1.05	1.13
P67366	ycfP UPF0227 protein YcfP	ycfP	15	15	15	15	15	1.15	1.14	1.18	1.05	1.13
P67367	ycfP UPF0227 protein YcfP	ycfP	15	15	15	15	15	1.15	1.14	1.18	1.05	1.13
Q8ZN19	pdxJ Pyridoxine 5-phosphate synthase	pdxJ	15	15	15	15	15	1.2	1.19	1.08	1.04	1.13
P37600	phsA Thiosulfate reductase molybdopterin-containing sub	phsA	15	15	15	15	15	1.19	1.23	1.06	1.02	1.13
Q7CQ47	yfbQ Putative aminotransferase (Ortho)	yfbQ	15	15	15	15	15	1.09	1.15	1.14	1.14	1.13
Q8ZL16	STM3791 Putative cytoplasmic protein	STM3791	12.5	15	15	15	14.38	1.22	1.3	1.01	0.98	1.13
P67557	mdoG Glucans biosynthesis protein G	mdoG	8.33	15	7.14	6.67	9.29	0.97	1.35	1.1	1.09	1.13
Q8ZNA6	fadI 3-ketoacyl-CoA thiolase	fadI	15	15	10	15	13.75	1.2	1.2	1.09	1.01	1.13
A0A0H2WPI6	ydcF Putative inner membrane protein	ydcF	15	15	15	15	15	1.19	1.05	1.14	1.04	1.11
P04285	oppD Oligopeptide transport ATP-binding protein OppD	oppD	15	15	15	15	15	1.23	1.16	1.06	1.04	1.13
Q7CPW1	rlmM Ribosomal RNA large subunit methyltransferase M	rlmM	15	15	15	15	15	1.19	1.09	1.2	1.02	1.13
Q8ZLT3	pnp Polyribonucleotide nucleotidyltransferase	pnp	7.14	9.09	10	10	9.06	1.04	1.35	1.04	1.06	1.12
Q8ZKA7	yjeF Bifunctional NAD(P)H-hydrate repair enzyme	yjeF	15	15	15	15	15	1.22	1.2	1.06	1.01	1.12
Q9ZJ12	epmA Elongation factor P--(R)-beta-lysine ligase	epmA	15	15	5.26	15	12.57	1.14	1.1	0.98	1.28	1.12
Q8ZKH4	dusA tRNA-dihydrouridine(20/20a) synthase	dusA	15	15	15	12.5	14.38	1.25	1.19	1.08	0.98	1.12
Q8ZMA4	aas Bifunctional protein Aas	aas	15	15	15	15	15	1.18	1.28	1.06	0.97	1.12
Q8ZQ65	helD DNA helicase	helD	15	15	15	15	15	1.19	1.25	1.04	1.01	1.12
P26391	rfbB dTDP-glucose 4,6-dehydratase	rfbB	15	15	15	15	15	1.16	1.18	1.11	1.04	1.12
Q7CQD8	manY Mannose-specific enzyme IIC	manY	15	15	12.5	15	14.38	1.2	1.27	1.14	0.88	1.12
Q8ZK34	STM4466 Carbamate kinase	STM4466	15	15	15	12.5	14.38	1.25	1.22	0.98	1.04	1.12
Q8ZKD9	dcuR Transcriptional regulatory protein	dcuR	15	15	15	15	15	1.22	1.25	1.04	0.98	1.12
Q8ZRQ8	pcnB Poly(A) polymerase I	pcnB	15	15	15	15	15	1.2	1.18	1.09	1.02	1.12
Q7CQC4	cmoA Carboxy-S-adenosyl-L-methionine synthase	cmoA	15	9.09	15	15	13.52	1.14	1.28	1.12	0.94	1.12
O52324	arnC Undecaprenyl-phosphate 4-deoxy-4-formamido-L-arabi	arnC	15	15	15	15	15	1.19	1.16	1.11	1.02	1.12
Q8ZPF0	STM1560 Malto-oligosyltrehalose trehalohydrolase	STM1560	15	15	15	15	15	1.16	1.2	1.06	1.05	1.12
Q05596	cbiO Cobalt import ATP-binding protein CbiO	cbiO	15	15	15	15	15	1.18	1.04	1.23	1.03	1.12
Q56106	fliB Lysine-N-methylase	fliB	15	15	15	15	15	1.18	1.22	1.09	1	1.12
Q7CPS0	ygiC Putative glutathionylspermidine synthase	ygiC	15	15	15	15	15	1.2	1.15	1.09	1.04	1.12
Q9L6L5	fadB Fatty acid oxidation complex subunit alpha	fadB	15	15	15	15	15	1.19	1.16	1.06	1.06	1.12
Q8ZR94	ybbK Putative inner membrane protein	ybbK	15	15	15	15	15	1.22	1.3	0.95	1.01	1.12
P37411	gyrA DNA gyrase subunit A	gyrA	15	15	15	15	15	1.19	1.3	0.98	1.01	1.12
P67197	ppsR Phosphoenolpyruvate synthase regulatory protein	ppsR	15	15	15	15	15	1.22	1.14	1.12	1	1.12
Q7CQG6	yciM Lipopolysaccharide assembly protein B	yciM	15	15	15	8.33	13.33	1.23	1.1	1.12	1.02	1.12
P43015	hilA Transcriptional regulator HilA	hilA	15	15	15	15	15	1.25	1.16	1.06	1	1.12
Q9L6R0	wecE dTDP-4-amino-4,6-dideoxygalactose transaminase	wecE	15	15	15	15	15	1.19	1.09	1.11	1.09	1.12
Q8ZL95	glyQ Glycine--tRNA ligase alpha subunit	glyQ	15	15	15	15	15	1.25	1.23	1.06	0.93	1.12
Q8ZRD0	ispA Geranyltranstransferase (Farnesyldiphosphate synth	ispA	15	15	15	12.5	14.38	1.39	0.88	1.01	1.19	1.12
P29847	cysE Serine acetyltransferase	cysE	15	15	15	15	15	1.18	1.27	1.04	0.98	1.12
Q8ZMN7	STM2767 DNA helicase	STM2767	15	15	15	15	15	1.08	1.1	1.19	1.1	1.12
Q8ZQF1	ltaA L-allo-threonine aldolase	ltaA	15	15	15	15	15	1.15	1.22	1.05	1.04	1.12
Q8ZRV8	rapA RNA polymerase-associated protein RapA	rapA	15	15	15	12.5	14.38	1.15	1.14	1.1	1.08	1.11
Q8ZK12	STM4495 Putative type II restriction enzyme, methylase sub	STM4495	5.88	15	15	15	12.72	1.15	1.14	1.16	1.01	1.11
Q8ZKW2	ravA ATPase RavA	ravA	7.69	15	15	15	13.17	1.14	1.3	0.97	1.05	1.11
Q8ZMA6	tas Putative aldo/keto reductase	tas	15	15	15	15	15	1.25	1.27	0.98	0.96	1.11
Q7CR73	STM0164 Putative LysR family transcriptional regulator	STM0164	15	15	15	15	15	1.3	1.18	1.02	0.96	1.11
O68838	gshA Glutamate--cysteine ligase	gshA	15	15	15	15	15	1.25	1.28	0.98	0.94	1.11
Q7CPT1	gsp Glutathionylspermidine synthetase	gsp	15	15	15	15	15	1.22	1.18	1.06	0.99	1.11
Q8ZQY2	ubiF Putative monooxygenase	ubiF	15	11.11	15	15	14.03	1.19	1.2	1.05	1	1.11
Q8ZP21	STM1795 Glutamate dehydrogenase	STM1795	15	15	15	15	15	1.2	1.11	1.06	1.06	1.11
Q7CQ03	pssA Phosphatidylserine synthase	pssA	15	15	15	15	15	1.04	1.18	1.15	1.08	1.11
P66881	surE 5/3-nucleotidase SurE	surE	15	15	15	10	13.75	1.25	1.19	1.05	0.94	1.11
Q8ZQC8	sopD2 Secreted effector protein sopD2	sopD2	15	15	15	15	15	1.1	1.12	1.15	1.06	1.11
Q8ZPF1	STM1559 Putative glycosyl hydrolase	STM1559	15	15	15	15	15	1.22	1.27	0.99	0.95	1.11
P0A269	ppx Exopolyphosphatase	ppx	15	12.5	12.5	15	13.75	1.14	1.2	1.08	1.01	1.11
Q8ZL33	sugR ATP binding protein	sugR	15	15	15	15	15	1.35	1.02	1.11	0.94	1.11
P08007	oppF Oligopeptide transport ATP-binding protein OppF	oppF	15	15	15	15	15	1.14	1.19	1.14	0.96	1.11
Q8ZLW6	yhaK Putative cytoplasmic protein	yhaK	15	15	15	15	15	1.22	1.47	0.88	0.85	1.11
Q8ZQ26	mdoH Glucans biosynthesis glucosyltransferase H	mdoH	15	15	15	15	15	1.19	1.16	1.09	0.98	1.11
O84947	sseC Secreted effector protein SseC	sseC	15	15	15	15	15	1.02	1.28	1.09	1.03	1.11
P67912	hldD ADP-L-glycero-D-manno-heptose-6-epimerase	hldD	15	15	15	15	15	1.2	1.23	1	0.98	1.1
Q9ZFV5	eutQ Ethanolamine utilization protein EutQ	eutQ	15	15	15	15	15	1.14	1.08	1.16	1.04	1.1
Q9L9I4	hemE Uroporphyrinogen decarboxylase	hemE	15	15	15	15	15	1.14	1.19	1.16	0.93	1.1
Q8ZKQ5	lsrR Transcriptional regulator LsrR	lsrR	15	15	15	15	15	1.11	1.23	1.09	0.98	1.1
Q9XCI8	der GTPase Der	der	15	12.5	6.25	15	12.19	1.14	1.18	1.02	1.08	1.1
H9L460	katE Catalase	katE	15	15	15	15	15	1.18	1.18	1.05	1	1.1
P37408	hemH Ferrochelatase	hemH	15	15	15	15	15	1.09	1.18	1.08	1.06	1.1
Q8ZLZ6	icc 3,5-cyclic adenosine monophosphate phosphodieste	icc	15	15	15	15	15	1.19	1.14	1.08	1	1.1
Q8ZN52	rlmN Dual-specificity RNA methyltransferase RlmN	rlmN	15	7.69	15	15	13.17	1.19	1.14	1.09	0.98	1.1
Q7CQF1	hnr Regulator of RpoS	hnr	15	15	15	15	15	1.14	1.03	1.06	1.16	1.1
Q8ZKH9	plsB Glycerol-3-phosphate acyltransferase	plsB	15	15	15	15	15	1.14	1.16	1.06	1.03	1.1
Q8ZP96	ydcF Putative inner membrane protein	ydcF	15	15	15	15	15	1.19	1.05	1.14	1.04	1.11
Q05311	uvrD DNA helicase II	uvrD	15	7.69	8.33	15	11.51	1.19	1.14	1.06	1	1.1
Q8ZKM0	ppc Phosphoenolpyruvate carboxylase	ppc	15	15	15	15	15	1.18	1.19	1.01	1.01	1.1
Q8ZLR5	arcB Aerobic respiration control sensor protein	arcB	6.67	15	10	12.5	11.04	1.02	1.16	1.06	1.14	1.1
P26401	rfbV Abequosyltransferase RfbV	rfbV	15	15	15	15	15	1.09	1.02	1.14	1.14	1.1
P26474	asrA Anaerobic sulfite reductase subunit A	asrA	15	15	15	15	15	1.11	1.12	1.19	0.95	1.09
Q8ZNG5	glpA Glycerol-3-phosphate dehydrogenase	glpA	15	15	15	15	15	1.09	1.11	1.14	1.04	1.09
Q7CPK3	gntR Transcriptional repressor gnt-I	gntR	15	15	7.14	11.11	12.06	1.09	1.08	1.25	0.96	1.09
Q8ZQV7	ybgK Putative carboxylase	ybgK	15	15	15	15	15	1.05	1.15	1.15	1.02	1.09
Q8ZKA5	hflX GTPase HflX	hflX	15	15	15	15	15	1.14	1.16	1.03	1.04	1.09
P0CL08	hilD Transcriptional regulator hilD	hilD	15	15	15	15	15	1.09	1.33	0.98	0.97	1.09
P67714	yejK Nucleoid-associated protein YejK	yejK	15	15	10	15	13.75	1.16	1.2	1.04	0.96	1.09
Q8ZQ73	rlmL Ribosomal RNA large subunit methyltransferase K/L	rlmL	15	15	15	15	15	1.14	1.12	1.1	1.01	1.09
Q8ZPF2	STM1558 Putative glycosyl hydrolase	STM1558	15	15	15	15	15	1.22	1.09	1.02	1.04	1.09
Q8ZKI5	lysC Aspartokinase	lysC	15	15	15	15	15	1.1	1.06	1.16	1.04	1.09
Q7CQV3	yliH Putative cytoplasmic protein	yliH	15	15	15	15	15	1.12	0.9	1.15	1.19	1.09
Q8ZPV0	astD N-succinylglutamate 5-semialdehyde dehydrogenase	astD	15	15	15	15	15	1.05	1.18	1.06	1.06	1.09
Q7CQ98	yegQ Putative protease	yegQ	15	15	15	6.25	12.81	1.2	1.09	1.08	0.98	1.09
Q8ZRU1	ddlB D-alanine--D-alanine ligase B	ddlB	15	15	15	15	15	0.85	1.14	1.22	1.14	1.09
P66869	sucC Succinate--CoA ligase [ADP-forming] subunit beta	sucC	15	15	15	15	15	1.15	1.16	1.04	0.99	1.09
Q8ZJW6	rsmC Ribosomal RNA small subunit methyltransferase C	rsmC	15	15	15	15	15	1.14	1.19	0.94	1.06	1.08
Q8ZKQ4	lsrA Autoinducer 2 import ATP-binding protein LsrA	lsrA	15	5.88	15	11.11	11.75	1.06	1.2	0.99	1.08	1.08
Q8ZKP3	glpK Glycerol kinase	glpK	15	15	15	15	15	1.14	1.11	1.05	1.03	1.08
P0A1W4	lepA Elongation factor 4	lepA	15	15	15	15	15	1.09	1.16	1.05	1.02	1.08
Q8ZP89	nifJ Pyruvate-flavodoxin oxidoreductase	nifJ	15	15	15	15	15	1.09	1.16	1.04	1.03	1.08
P19264	eutB Ethanolamine ammonia-lyase heavy chain	eutB	15	15	15	15	15	1.08	1.06	1.14	1.04	1.08
H9L472	srfB SsrAB activated protein	srfB	10	5.56	9.09	11.11	8.94	0.9	1.04	1.19	1.18	1.08
Q8ZMI5	hypE Putative hydrogenase expression/formation protein	hypE	11.11	15	15	15	14.03	1.02	1.12	1.12	1.04	1.08
Q7CPC1	cytR GalR/LacI family transcriptional repressor	cytR	15	15	15	15	15	1.02	1.11	1.18	1	1.08
P14161	mutL DNA mismatch repair protein MutL	mutL	15	15	15	15	15	1.11	1.11	1.06	1.02	1.08
P10503	putA Bifunctional protein PutA	putA	15	15	15	15	15	1.09	1.12	1.04	1.05	1.08
P0A267	gppA Guanosine-5-triphosphate,3-diphosphate pyrophosp	gppA	15	15	8.33	15	13.33	1.16	1.12	1.06	0.95	1.08
Q8ZPU9	astB N-succinylarginine dihydrolase	astB	15	15	15	15	15	1.06	1.27	1	0.97	1.08
Q8ZNG4	glpB Anaerobic glycerol-3-phosphate dehydrogenase subun	glpB	15	15	15	15	15	1.11	1.11	1.08	1	1.07
Q8ZPE8	maeA NAD-dependent malic enzyme	maeA	15	15	15	15	15	1.06	1.14	1.06	1.03	1.07
Q8ZR88	selU tRNA 2-selenouridine/geranyl-2-thiouridine synthas	selU	15	15	9.09	15	13.52	1.11	1.09	1.08	1.02	1.07
Q8ZP17	dadA D-amino acid dehydrogenase	dadA	15	15	15	15	15	1.1	1.14	1.05	1	1.07
Q7CPL5	rplN 50S ribosomal protein L14	rplN	15	15	15	15	15	1.1	1.1	1.1	0.99	1.07
Q8ZQ01	mfd Transcription-repair-coupling factor	mfd	15	15	15	15	15	1.05	1.05	1.14	1.04	1.07
P60802	pdxB Erythronate-4-phosphate dehydrogenase	pdxB	15	15	15	15	15	1.11	1.11	1.1	0.96	1.07
Q04873	udg UDP-glucose 6-dehydrogenase	udg	15	15	15	15	15	0.98	1.06	1.08	1.16	1.07
Q8ZLK6	nirB Nitrite reductase large subunit	nirB	15	15	15	15	15	1.16	1.11	1.04	0.96	1.07
H9L489	srfC SsrAB activated protein	srfC	9.09	15	15	15	13.52	1.04	1.28	0.95	1	1.07
P0CL46	fhlA Formate hydrogenlyase transcriptional activator	fhlA	15	7.14	9.09	15	11.56	0.76	1.32	1.09	1.11	1.07
Q8ZPZ9	nagK N-acetyl-D-glucosamine kinase	nagK	15	15	15	11.11	14.03	1.2	1.14	0.96	0.96	1.07
Q8ZNB2	mnmC tRNA 5-methylaminomethyl-2-thiouridine biosynthesi	mnmC	15	12.5	15	15	14.38	1.18	1.01	1.09	0.99	1.07
Q05597	cbiP Cobyric acid synthase	cbiP	10	15	15	12.5	13.13	1.23	0.93	1.04	1.05	1.07
P0A9X6	mreB Rod shape-determining protein MreB	mreB	15	15	15	15	15	1.08	1.1	1.1	0.99	1.07
Q8ZS19	thrA Bifunctional aspartokinase/homoserine dehydrogenas	thrA	15	15	15	15	15	1.02	1.04	1.14	1.06	1.07
P37418	menE 2-succinylbenzoate--CoA ligase	menE	15	15	5	15	12.5	1.19	1.04	1.1	0.93	1.06
Q8ZNJ8	yejF Putative ATPase component of ABC-type transport sy	yejF	15	15	15	15	15	1.06	1.02	1.1	1.06	1.06
Q8ZN36	csiE Stationary phase inducible protein	csiE	15	15	15	15	15	0.98	1.09	1.12	1.05	1.06
P15111	gdhA NADP-specific glutamate dehydrogenase	gdhA	15	15	15	15	15	1.14	1.03	1.12	0.94	1.06
P0A1B9	spaL Probable ATP synthase SpaL	spaL	15	15	12.5	15	14.38	1.06	1.12	1.06	0.97	1.06
O86090	ppk Polyphosphate kinase	ppk	15	15	15	15	15	1.06	1.19	0.96	1	1.05
Q8ZNV1	cmoB tRNA U34 carboxymethyltransferase	cmoB	15	7.14	9.09	15	11.56	1.09	1.06	1.08	0.98	1.05
Q8ZLY6	glnE Bifunctional glutamine synthetase adenylyltransfer	glnE	15	15	15	15	15	1.04	1.19	1.02	0.95	1.05
Q7CPH7	grxC Glutaredoxin	grxC	12.5	15	15	15	14.38	1.06	0.98	1.06	1.09	1.05
Q05587	pocR Regulatory protein PocR	pocR	15	15	15	15	15	1.08	1.03	1.11	0.97	1.05
O52325	arnA Bifunctional polymyxin resistance protein ArnA	arnA	15	15	15	15	15	1.02	1.04	1.12	1	1.05
P41789	glnG DNA-binding transcriptional regulator NtrC	glnG	15	15	15	15	15	0.94	1.11	1.1	1.03	1.05
Q8ZLT0	argG Argininosuccinate synthase	argG	15	15	15	15	15	1.14	0.96	1.04	1.04	1.05
Q8ZPM8	pdxY Pyridoxal kinase PdxY	pdxY	15	15	15	15	15	1.12	1.09	1.05	0.92	1.05
Q8ZK13	STM4494 Putative ABC-type sugar/spermidine/putrescine tran	STM4494	15	12.5	15	15	14.38	0.81	1.33	1.1	0.93	1.04
P19265	eutC Ethanolamine ammonia-lyase light chain	eutC	15	15	15	15	15	0.93	0.98	1.25	1.02	1.04
P0A1Y0	mutS DNA mismatch repair protein MutS	mutS	15	15	15	15	15	1.02	1.14	1.04	0.96	1.04
P12680	pabB Aminodeoxychorismate synthase component 1	pabB	15	7.14	15	15	13.04	1.04	1.1	1.03	0.96	1.03
Q05628	cbiD Cobalt-precorrin-5B C(1)-methyltransferase	cbiD	10	15	15	15	13.75	1.1	1.1	1.02	0.91	1.03
Q8ZNT0	dcm Cytosine-specific methyltransferase	dcm	15	15	15	15	15	0.97	1.09	0.99	1.04	1.02
Q8ZM25	STM3132 Putative xylanase	STM3132	15	15	15	11.11	14.03	0.8	1.18	1.06	1.04	1.02
H9L492	STM2405 Putative thiamine pyrophosphate enzymes	STM2405	15	15	15	15	15	0.98	0.99	1.1	1.01	1.02
Q8ZQC7	ycaO Putative cytoplasmic protein	ycaO	12.5	15	15	15	14.38	1.15	0.97	0.85	1.11	1.02
P29946	cbiA Cobyrinate a,c-diamide synthase	cbiA	15	15	15	15	15	0.87	1.18	0.98	1.01	1.01
P55913	thiI tRNA sulfurtransferase	thiI	15	15	15	9.09	13.52	1.01	1.09	1.06	0.87	1.01
Q56066	moeA Molybdopterin molybdenumtransferase	moeA	15	15	15	15	15	1.16	1.04	0.99	0.83	1.01
Q8ZLT4	deaD ATP-dependent RNA helicase DeaD	deaD	15	15	15	15	15	0.94	1.28	0.83	0.95	1
Q8ZKQ6	lsrK Autoinducer-2 kinase	lsrK	15	15	15	15	15	1.04	0.96	1.04	0.95	1
Q8ZMM6	mig-14 Putative transcription activator	mig-14	15	15	15	15	15	0.96	0.98	1.08	0.97	1
Q7CP97	frdA Fumarate reductase flavoprotein subunit	frdA	15	15	15	15	15	1.25	1.23	0.79	0.71	1
Q8ZKW4	asnA Aspartate--ammonia ligase	asnA	15	15	15	15	15	0.95	0.94	1.1	1	1
Q8ZR01	rlpA Endolytic peptidoglycan transglycosylase RlpA	rlpA	8.33	15	15	6.67	11.25	1.11	0.98	1	0.92	1
P24900	recF DNA replication and repair protein RecF	recF	10	12.5	15	15	13.13	1.11	0.95	1.06	0.88	1
