# Supplementary material for: Chemoproteomic profiling of itaconations in Salmonella
Source: Royal Society of Chemistry journal article supplement (doi:10.1039/d1sc00660f), 2021-01-01
Supplement: d1sc00660f3.xlsx [file d1sc00660f3.xlsx]

## Sheet: Sheet1
Uniprot	Gene Symbol	Modified Peptide	Site
Q9ZJ12	epmA	R.LLAAGCGPVFQLC*R.S	96
Q9ZJ12	epmA	R.LLAAGC*GPVFQLCR.S	89
Q9ZFV8	maeB	R.DLALAYSPGVAAPC*LEIEKDPLAAYK.Y	47
Q9ZFV4	eutT	R.LFVDDDEQQPQPVHGLTSSDTHPQACCELC*R.Q	83
Q9ZF31	infB	R.NGMEC*GIGVK.N	863
Q9ZF31	infB	K.FGAIAGC*MVTEGTIKR.H	817
Q9ZF31	infB	R.EGTLHKGDIVLC*GFEYGR.V	601
Q9Z4S6	ttrA	R.HLTPDGEETPVVLNTDGELVDASTC*R.Q	433
Q9XDN1	pduP	R.C*VLTNGFSIR.-	455
Q9XDN1	pduP	K.AAEDIINGASFDYNLPC*IAEK.S	271
Q9XDN1	pduP	K.VIGAGAGNPPC*IVDETADLVK.A	244
Q9XDN0	pduQ	K.LVFQYLPTAVEKGDC*VATR.G	217
Q9RPU4	hpaR	R.TC*ILRPSLTGILTR.M	56
Q9RF52	pepB	R.GSERPPVLLALDYNPTGDKDAPVYAC*LVGK.G	191
Q9RF52	pepB	R.AVDLLCSVAC*DSVTYR.I	139
Q9RCI2	miaB	K.TWGC*QMNEYDSSK.M	12
Q9L9I4	hemE	R.AQAGDFMSLC*K.N	50
Q9L9I4	hemE	R.FTAPVTC*K.A	105
Q9L6R5	wecB	R.AHNPYGDGQSC*AR.I	362
Q9L6R4	wecC	K.KLDGLC*TLAK.L	375
Q9L6R4	wecC	R.VNILQPGPGVGGHC*IAVDPWFIVAQNPQQAR.L	266
Q9L6R4	wecC	R.VIGGM#TPVC*SAR.A	184
Q9L6R1	wecD	R.GAGAELMQAAIC*WAQSR.G	141
Q9L6Q8	wecF	R.EFMVAGEDNGFTESC*PALSLR.F	50
Q9L6N4	yigL	K.GC*IMGNAHQR.L	229
Q9L6M1	rfaH	R.QAVSC*LTPMITLEK.M	28
Q9L6L9	fre	R.DLFC*HER.N	215
Q9L6L5	fadB	K.TPIVVNDC*PGFFVNR.V	494
Q9L6L1	hemG	R.KFLMSSPWRPDYC*AVIAGALR.Y	119
Q9L4T0	luxS	R.DHLNGNGVEIIDISPMGC*R.T	83
Q9L4T0	luxS	R.FC*IPNKEVMPEK.G	41
Q9L4T0	luxS	K.VQDQNQIPELNVYQC*GTYQMHSLSEAQDIAR.H	128
Q9F173	polA	K.RIHQLMENC*TR.I	907
Q93IM5	glk	R.ALADSC*IDCR.R	227
Q93IM5	glk	R.LALC*DIASGEISQAK.T	20
Q93GQ8	parA	R.C*GETFDTVISANPATYDGSTEALK.S	352
Q93GQ7	parB	K.FQQFFPC*IGIQQGERIEILDGSR.R	90
Q8ZRZ0	ileS	R.RSC*QTALYHIAEALVR.W	750
Q8ZRZ0	ileS	R.IESMVANRPDWC*ISR.Q	463
Q8ZRX8	dapB	K.NLKDC*AVYSR.E	189
Q8ZRV8	rapA	R.WYHEGLDAFEHTC*PTGR.A	636
Q8ZRU7	murE	R.RWLASLPDAVAVSMEGHINPNC*HGR.W	269
Q8ZRU6	murF	R.VLVVGDMAELGAESEAC*HLQVGEAAK.A	371
Q8ZRU4	murD	R.VQPGDMVLLSPAC*ASLDQFKNFEQR.G	414
Q8ZRU2	murC	R.AVMC*VDDPVIR.E	230
Q8ZRT5	guaC	R.SAC*TYVGASR.L	316
Q8ZRT5	guaC	K.TGVGYPQLSAVIECADAAHGLGGMIVSDGGC*TMPGDVAK.A	222
Q8ZRT5	guaC	K.VGIGPGSVC*TTR.V	186
Q8ZRT2	aceE	R.DGQDC*ERWNMLHPLETPR.V	772
Q8ZRT2	aceE	R.IGDLC*WQAGDQQAR.G	612
Q8ZRT0	lpdA	R.YNTLGGVCLNVGC*IPSK.A	50
Q8ZRT0	lpdA	R.YNTLGGVC*LNVGCIPSKALLHVAK.V	45
Q8ZRT0	lpdA	R.AIASDC*ADGMTK.L	392
Q8ZRT0	lpdA	R.C*ADLGLETVIVER.Y	25
Q8ZRS8	acnB	R.IEIPGCSLC*MGNQAR.V	772
Q8ZRS8	acnB	R.IEIPGC*SLCMGNQAR.V	769
Q8ZRS8	acnB	R.LLSDVQGEKIDEVFIGSC*MTNIGHFR.A	710
Q8ZRS8	acnB	R.SAAGC*TIKLNKEPIVEYLTSNIVLLK.W	607
Q8ZRS8	acnB	K.GIRPGAYC*EPK.M	404
Q8ZRS8	acnB	K.RGGGLC*LGGK.I	273
Q8ZRS1	gcd	K.ADTASPEVIADC*PR.R	286
Q8ZRR1	panC	R.TLQEDC*EK.L	79
Q8ZRR1	panC	K.LFNLIQPDIAC*FGEK.D	147
Q8ZRQ6	sfsA	R.FLADVITPDGTTLTLHCPNTGAMTGC*ATPGDTVWYSTSENTKR.K	44
Q8ZRQ5	ligT	R.SGC*YQSPQPFHPHITLLR.D	115
Q8ZRP2	uppS	R.LGQQIC*MHELAPVDLVIR.T	181
Q8ZRN9	lpxB	K.AFYDKFNVPC*R.F	161
Q8ZRN2	yaeB	K.SAC*GELHLIAPYNQADAVR.G	33
Q8ZRM2	gloB	K.INSLPDDTLIC*CAHEYTLANIK.F	162
Q8ZRJ8	yafV	R.ILPLIC*YDLR.F	141
Q8ZRJ7	fadE	K.LHNYPQPQLTAEEQAFLDGPVEEAC*R.M	136
Q8ZRF0	proC	K.MVLETGKHPGELKDMVC*SPGGTTIEAVR.V	230
Q8ZRF0	proC	K.IGFIGC*GNM#GK.A	10
Q8ZRE7	ppnP	K.VYTAGEVFNVPGHSEFHLQVAEPASYLC*R.Y	91
Q8ZRE5	yajF	K.SFVFGGEC*ETPVRK.A	277
Q8ZRD8	tgt	R.ILEHVC*PQIPADKPR.Y	232
Q8ZRD4	ribD	R.TPPCC*DALIAAGVAR.V	85
Q8ZRD4	ribD	R.TPPC*CDALIAAGVAR.V	84
Q8ZRD2	yajO	R.LC*LGCMTFGEPSR.G	17
Q8ZRD1	dxs	K.FDPSSGC*LPK.S	310
Q8ZRC0	clpX	K.LLQKC*DYDVQK.A	169
Q8ZRB9	lon	R.C*LEAAMDHDKK.I	39
Q8ZRB9	lon	K.GPILC*LVGPPGVGK.T	353
Q8ZRB2	tesB	K.FLC*DRPLEIRPVEFHNPLK.G	154
Q8ZRA2	apt	K.QGITC*YSLVPFPGH.-	174
Q8ZR93	ybbL	K.LITGPSGC*GK.S	44
Q8ZR86	allR	R.NGNEAVLIGQKEC*K.S	135
Q8ZR76	allD	R.IENTGPC*TAILHADNAAGQVAAK.M	75
Q8ZR61	STM0557	K.IC*NNVYIK.S	445
Q8ZR57	STM0563	R.LLTLNAPQGSIDKNC*PLGGDWQLPHAAGELSVIR.W	21
Q8ZR17	ybdR	R.VTATAIC*GSDLHLYR.G	38
Q8ZR17	ybdR	R.LQQYSAC*ENTNDGHGAAMNKK.Q	104
Q8ZR03	lipB	R.INPC*GYAGMEMAK.I	169
Q8ZQZ6	leuS	K.AAANNAELAAFIDEC*R.N	285
Q8ZQZ6	leuS	K.TSAVNWC*PNDQTVLANEQVIDGCCWR.C	159
Q8ZQZ6	leuS	R.EIATC*TPEYYR.W	128
Q8ZQZ2	ybeL	K.C*GHDQFQR.R	145
Q8ZQY2	ubiF	R.RHDGYALELADGEC*ITPK.L	155
Q8ZQY0	asnB	R.EIFEELFPVPSAAECVPGGPSVAC*SSAK.A	523
Q8ZQY0	asnB	K.HVLREC*FESYLPASVAWR.Q	436
Q8ZQY0	asnB	R.HRGPDWSGIYAC*DNAILAHER.L	41
Q8ZQY0	asnB	K.LQALHMYDC*AR.A	386
Q8ZQY0	asnB	K.ALTPVC*R.T	169
Q8ZQX7	nagB	K.AVVVC*DEPSTMELK.V	239
Q8ZQX6	nagE	R.VNDAAC*KR.L	431
Q8ZQX6	nagE	K.AIDAC*ITR.L	412
Q8ZQX5	glnS	K.QDNTIEM#ASLESC*IREDLNENAPR.A	331
Q8ZQX5	glnS	R.TGGFEEGKAC*LR.A	172
Q8ZQX4	chiQ	K.EAYSAC*INTAQGSPEK.I	36
Q8ZQW9	pgm	K.NGITGPC*YVGK.D	81
Q8ZQW9	pgm	R.MDCSSEC*AMAGLLALR.D	285
Q8ZQW9	pgm	R.MDC*SSECAMAGLLALR.D	281
Q8ZQW5	kdpE	R.HAASPC*ADPIVR.F	124
Q8ZQU3	sdhA	K.GSDYIGDQDAIEYM#C*K.T	89
Q8ZQU3	sdhA	R.FDFPERDDANWLC*HTLYQPQTESMTRR.S	555
Q8ZQU3	sdhA	K.ALQEC*M#QHNFSVFR.E	466
Q8ZQU3	sdhA	R.TFAHVDPVKEPIPVIPTC*HYM#MGGIPTK.V	353
Q8ZQU3	sdhA	R.AALQISQSGQTC*ALLSK.V	33
Q8ZQU3	sdhA	R.EGRGC*DGPWGPHAK.L	303
Q8ZQU3	sdhA	R.AGVPVQDMEMWQFHPTGIAGAGVLVTEGC*RGEGGYLLNK.H	257
Q8ZQU2	sdhB	K.NGLAC*ITPISALTQPGK.K	75
Q8ZQU2	sdhB	R.EGVC*GSDGLNMNGK.N	60
Q8ZQU2	sdhB	R.RSC*REGVCGSDGLNMNGK.N	55
Q8ZQU2	sdhB	R.CHSIM#NCVSVC*PK.G	216
Q8ZQU2	sdhB	R.CHSIMNC*VSVCPK.G	212
Q8ZQU2	sdhB	R.C*HSIMNCVSVCPK.G	206
Q8ZQU1	sucA	K.AVQEALQPYAHVHDFVWCQEEPLNQGAWYC*SQHHFR.E	884
Q8ZQU1	sucA	K.AVQEALQPYAHVHDFVWC*QEEPLNQGAWYCSQHHFR.E	872
Q8ZQU1	sucA	R.VVMC*SGK.V	820
Q8ZQU1	sucA	R.MC*GLVM#LLPHGYEGQGPEHSSAR.L	712
Q8ZQU1	sucA	R.DALDAGEC*VVKEWRPMNMHSFTWSPYLNHEWDEAYPNKVEMK.R	518
Q8ZQU1	sucA	R.DVFIDLVC*YR.R	454
Q8ZQU1	sucA	R.STPYC*TDIGK.M	408
Q8ZQU1	sucA	K.LGELLDALKQTYC*GPIGAEYM#HITSTEEKR.W	165
Q8ZQU0	sucD	R.EAVEATGATASVIYVPAPFC*KDSILEAIDAGIK.L	78
Q8ZQU0	sucD	K.QTTDYGFGQSTC*VGIGGDPIPGSNFIDILK.L	175
Q8ZQU0	sucD	R.M#IGPNCPGVITPGEC*K.I	133
Q8ZQU0	sucD	K.VIC*QGFTGSQGTFHSEQAIAYGTQM#VGGVTPGKGGTTHLGLPVFNTVR.E	13
Q8ZQU0	sucD	R.MIGPNC*PGVITPGEC*K.I	124
Q8ZQT2	aroG	R.LLVVIGPC*SIHDPAAAK.E	61
Q8ZQT2	aroG	K.SITDAC*IGWEDTDALLR.Q	328
Q8ZQT2	aroG	K.AGLTPQVM#IDFSHANSC*K.Q	272
Q8ZQT2	aroG	R.ELASGLSC*PVGFK.N	181
Q8ZQT1	STM0761	K.IEVALSNGEKSPVDFQNQTIYYAGPC*PARPGLPIGSNGPTTAAR.M	64
Q8ZQT1	STM0761	K.GDRADYVAELC*KK.Y	112
Q8ZQT0	STM0762	R.ITALGVHVDYYPCHITALPVAINFQC*NASR.H	271
Q8ZQR4	pgl	R.LQDGLPVELVDVVEGLDGC*HSANITPDNR.T	129
Q8ZQR2	hutI	R.EGHIC*DIVPETQLPVSGDNIHDMQGR.L	43
Q8ZQR0	hutC	R.SAPAPFYETVKQDIC*KK.I	22
Q8ZQQ9	hutH	R.HLLTDTSAIAESHHHC*HK.V	274
Q8ZQQ2	slrP	K.RDEC*IETDEYQSR.V	691
Q8ZQP4	clsB	R.DNLQGIIVNDC*KQVDESMLPK.R	344
Q8ZQN9	ybiH	R.LVAAYTGC*DANDTR.M	158
Q8ZQM1	rimO	K.VIVTGC*LGAKEDQIR.E	82
Q8ZQM1	rimO	K.IGFVSLGC*PK.N	17
Q8ZQK7	STM0867	R.ADVEIIAC*GK.N	107
Q8ZQF2	ybjT	R.LANVSC*HKVDLHWPENLPALLR.D	49
Q8ZQD3	dmsA	K.RVDQGGC*INVLTTQRPSPLAK.G	786
Q8ZQD3	dmsA	K.VVWSAC*TVNCGSR.C	63
Q8ZQD3	dmsA	R.EIGSAKPAYIC*QGWGPQR.H	383
Q8ZQD0	pflA	R.FITFFQGC*LMR.C	58
Q8ZQD0	pflA	R.IHSFESC*GTVDGPGIR.F	41
Q8ZQC8	sopD2	K.VIDKC*NLHR.L	122
Q8ZQC6	ycaP	K.DVKPGLSILPEHC*TPR.F	180
Q8ZQC0	kdsB	R.AVEAAGGEVC*MTR.A	66
Q8ZQC0	kdsB	K.SLETVGDTC*LR.H	178
Q8ZQB6	mukE	K.ILC*YLYLSPER.L	91
Q8ZQ76	pepN	R.HDGSAATC*DDFVQAMEDASNVDLSHFR.R	418
Q8ZQ73	rlmL	K.NGPLDC*VQK.N	372
Q8ZQ65	helD	K.VSGDRHEYLIPFNQLLAIHC*KR.G	48
Q8ZQ64	rlmI	K.SQLMGAC*R.G	322
Q8ZQ31	STM1133	K.ELNC*VATATMEALCSHPDVDCVIIASPNYLHK.A	47
Q8ZQ30	ghrA	K.VAESLQAWGFPLRC*WSR.S	164
Q8ZQ26	mdoH	R.WC*HGNLMNFR.L	491
Q8ZQ24	htrB	K.AC*IIPFVPR.R	235
Q8ZQ17	rne	R.DERYPTQSPMPLTVAC*ASPEMASGK.V	830
Q8ZQ17	rne	R.C*VIVPNDQMETPHYSVLR.V	471
Q8ZQ17	rne	R.LSPSLGESSHHVC*PR.C	404
Q8ZQ17	rne	K.SQDVVC*VDDHNHASAPMTR.A	1005
Q8ZQ14	fabF	K.FAGLVKDFNC*DDIISRK.E	59
Q8ZQ14	fabF	R.DQAIPPTINLDNPDEGC*DLDFVPHEAR.Q	376
Q8ZQ14	fabF	R.GPSISIATAC*TSGVHNIGHAAR.I	164
Q8ZQ06	nagZ	K.ETPC*DPRPETDIR.G	181
Q8ZQ05	ndh	R.INQLVVEPTLQTTRDPDIYAIGDCASC*ARPEGGFVPPR.A	319
Q8ZQ05	ndh	R.INQLVVEPTLQTTRDPDIYAIGDC*ASCARPEGGFVPPR.A	316
Q8ZQ05	ndh	K.IAYDTLVM#ALGSTSNDFNTPGVKEHC*IFLDNPHQAR.R	138
Q8ZQ02	ycfS	R.VSSGC*IR.M	5
Q8ZPZ9	nagK	R.CGC*GQMGCIENYLSGR.G	179
Q8ZPZ9	nagK	R.C*GCGQMGCIENYLSGR.G	177
Q8ZPZ4	mnmA	R.TPNPDILC*NKEIK.F	102
Q8ZPZ0	icdA	K.C*SEFGDAIIANM#.-	405
Q8ZPZ0	icdA	K.KIRFPEHCGIGIKPC*SEEGTK.R	201
Q8ZPZ0	icdA	K.IRFPEHC*GIGIKPC*SEEGTKR.L	194
Q8ZPW5	yeaK	R.YRVVNHEAVGKC*EAVSEIR.G	36
Q8ZPW3	yeaH	R.YDPGQWNIYAAQASDGDNWADDSPLC*HEILAK.K	358
Q8ZPW2	yeaG	K.LLNHSELAHAPC*APGTLETLSR.F	356
Q8ZPW2	yeaG	K.VPYC*LR.I	332
Q8ZPW2	yeaG	R.KLEHHAQNDPDAYGYSGALC*R.A	252
Q8ZPW2	yeaG	R.SPVNDHPLC*LFNPQEDAQILEKEYGIPR.R	150
Q8ZPW0	STM1288	R.GIEYDLLPWC*QQQR.M	184
Q8ZPW0	STM1288	R.IPGGQQC*ATNQVLYHLASR.G	162
Q8ZPV9	yeaD	R.GGVPIC*WPWFGPAAQQGLPSHGFAR.N	80
Q8ZPV9	yeaD	R.LAQTIC*VAKR.-	290
Q8ZPV9	yeaD	R.VYLNPEAC*SVIHDATLNR.T	217
Q8ZPV7	ansA	R.GIVVVNLTQC*MSGR.V	273
Q8ZPV5	selD	K.NSTAQAGC*K.L	172
Q8ZPV5	selD	R.LTQYSHGAGC*GCK.I	17
Q8ZPV2	astC	R.ELC*DRHQALLIFDEVQTGVGR.T	213
Q8ZPV2	astC	R.HAAYNDLNSASALIDDNTC*AVIVEPVQGEGGVIPATK.A	185
Q8ZPV2	astC	R.VFFC*NSGAEANEAALK.L	102
Q8ZPV1	astA	R.LVLTAAQLDALKC*R.A	326
Q8ZPV0	astD	K.TNPVSAEILWQGNDANAAQVAEAC*QAAR.A	43
Q8ZPV0	astD	R.FGLSC*GLVSTDR.A	405
Q8ZPU9	astB	R.ESMANGGGPAC*LR.L	365
Q8ZPU9	astB	R.QVLFC*HEAAFAR.Q	262
Q8ZPU8	astE	R.VTVTHDVEYVLFPNPSVAC*GLR.A	310
Q8ZPU5	nadE	R.LPYGVQADEQDC*QDAIAFIQPDR.V	94
Q8ZPU5	nadE	K.QLLAALGC*PEHLYK.K	201
Q8ZPT7	yniC	R.DSFDALASAEKLPYSKPHPQVYLDC*AAK.L	157
Q8ZPT7	yniC	R.EAVALC*K.A	104
Q8ZPT5	pfkB	R.C*SAPVFEPGGGGINVAR.A	30
Q8ZPT5	pfkB	R.FGVAAGSAATLNQGTRLC*SRDDTQK.I	295
Q8ZPT5	pfkB	R.RVVVSLGPQGALGIDSENC*IQVVPPPVK.S	238
Q8ZPT5	pfkB	R.C*IIDSSGDALTAALALGDIELVKPNLK.E	163
Q8ZPS9	thrS	R.HSC*AHLLGHAIK.Q	75
Q8ZPS9	thrS	R.RVPYM#LVC*GDKEVEAGK.V	596
Q8ZPS9	thrS	R.GFTQDDAHIFCTEEQIRDEVNAC*IR.M	400
Q8ZPS9	thrS	R.GFTQDDAHIFC*TEEQIRDEVNACIR.M	388
Q8ZPS9	thrS	R.MAEFGSC*HR.N	361
Q8ZPS9	thrS	K.TGHWDNYKDAMFTTSSENREYC*IKPMNCPGHVQIFNQGLK.S	328
Q8ZPS9	thrS	K.VAILDENIAHDDKPGLYHHEEYVDMC*RGPHVPNMR.F	182
Q8ZPS3	pps	K.VMMNVGNPDRAFDFAC*LPNEGVGLAR.L	501
Q8ZPS3	pps	R.ELGIPAVVGC*GDATER.M	437
Q8ZPS3	pps	R.TC*HAAIIAR.E	420
Q8ZPQ5	sufA	K.QTGC*AGFGYVLDTVREPDKDDLVFEAEGAK.L	50
Q8ZPQ2	sufD	K.YTPLEGLTHSQFIQQC*ATISAAQR.D	66
Q8ZPP1	ribE	R.FC*VHLIPETLER.T	158
Q8ZPN5	ydhF	K.C*GIATTAR.A	84
Q8ZPN5	ydhF	R.IRPM#AWSC*LGGGR.L	211
Q8ZPM9	pdxH	R.WLGQAC*DAR.L	43
Q8ZPM8	pdxY	K.YFCDPVMGHPEKGC*IVAPGVAEFHVR.Y	121
Q8ZPM8	pdxY	K.YFC*DPVM#GHPEKGCIVAPGVAEFHVR.Y	110
Q8ZPM7	gst	K.LQYVDESLSDDQWIC*GQR.F	147
Q8ZPM7	gst	K.LFYKPGAC*SLASHITLR.E	10
Q8ZPL9	add	R.TFGEAAC*LQELDALLAHR.E	149
Q8ZPL9	add	R.DGC*NTFGVEAR.L	127
Q8ZPK4	osmV	R.NASGIC*ADITHPFR.I	313
Q8ZPK4	osmV	R.IVQC*ASPDELLAKPANEFVGSFVGQDR.T	222
Q8ZPJ3	speG	R.FVVEC*DGENAGLVELVEINHVHR.R	64
Q8ZPJ3	speG	R.MC*IFQQQYLDEHKTSGSTLLKPTAQ.-	163
Q8ZPI7	ydeJ	R.LTTAESC*TGGK.L	41
Q8ZPI7	ydeJ	R.QHFNGDC*QEVLEK.C	152
Q8ZPH6	hypA	R.FHITIAPAQGWCLSCNQPFTSQTSTLCC*PLCHSGK.V	89
Q8ZPH6	hypA	R.FHITIAPAQGWCLSCNQPFTSQTSTLC*CPLCHSGK.V	88
Q8ZPH6	hypA	R.FHITIAPAQGWCLSC*NQPFTSQTSTLCCPLCHSGK.V	76
Q8ZPH4	STM1533	K.SGFMVIDEGNSSC*KD.-	351
Q8ZPG9	STM1539	K.GPTTYNAC*STVR.W	275
Q8ZPF2	STM1558	R.SQMGNNNGYC*QDSEISWVHWDNLPETANALR.E	545
Q8ZPF2	STM1558	R.SC*NYGAEGPTDDEGINAIRER.Q	490
Q8ZPF1	STM1559	R.TYGTAEGLPPTDIC*LLHR.I	405
Q8ZPE8	maeA	K.LVQKC*DNLQHWDTENDVLSLLDVVR.N	359
Q8ZPE8	maeA	R.LVQNHLEEM#MPVIYTPTVGAAC*ER.F	112
Q8ZPD9	narW	K.FIEDNATTC*DSSPLHHYQR.R	202
Q8ZPD7	steA	K.VAEFC*ANAGNIHNHLADAVR.D	68
Q8ZPD4	yncB	R.MSDEPSYAPPVEPGC*VMVGGTVSR.V	83
Q8ZPD4	yncB	R.IPLC*GLVSGYNATALPDGPDRLPLLMATLLK.K	258
Q8ZPD4	yncB	R.VVGIAGGAEKC*R.H	198
Q8ZPD3	yncA	R.FADKADC*AAITEIYNHAVLHTAAIWNDR.T	11
Q8ZPC9	prr	R.LESQNCGKPLHC*VINDEIPAIVDVFR.F	95
Q8ZPC9	prr	R.LESQNC*GKPLHCVINDEIPAIVDVFR.F	89
Q8ZPC9	prr	R.TFGFYNAGQDC*TAACR.I	280
Q8ZPC9	prr	K.LAPALAAGNC*VVIKPSEITPLTALK.L	168
Q8ZPC9	prr	R.C*LSGLAAGEYLEGHTSMIR.R	117
Q8ZPC8	ydcR	R.IIARPQSGYYVAPHPVC*R.S	72
Q8ZPC3	tehB	R.TLDLGC*GNGR.N	39
Q8ZPC0	rimL	R.RNHFTLEGC*MK.Q	155
Q8ZPA8	STM1627	R.AALECC*HKGWGESIIIGVAGAGQEIK.T	277
Q8ZPA8	STM1627	R.AALEC*CHK.G	276
Q8ZPA8	STM1627	K.VNPQAPLDKVCLLGC*GVTTGIGAVHNTAK.V	169
Q8ZPA8	STM1627	K.VNPQAPLDKVC*LLGCGVTTGIGAVHNTAK.V	165
Q8ZPA8	STM1627	K.TNLC*QAVR.A	106
Q8ZP96	ydcF	R.STNC*GENAR.F	126
Q8ZP91	ldhA	R.C*AGFNNVDLDAAK.E	76
Q8ZP91	ldhA	K.TANGC*EAVCIFVNDDGSRPVLEELKK.H	45
Q8ZP91	ldhA	K.GEAC*PNALF.-	324
Q8ZP88	ttcA	R.NVGEAIADFNMIEEGDRIMVC*LSGGK.D	45
Q8ZP88	ttcA	K.TTCSLC*SR.L	125
Q8ZP84	uspE	K.C*PSPVWMVK.D	138
Q8ZP71	STM1676	K.VTDKEEC*QQSVLSAIR.S	28
Q8ZP66	ycjG	R.SEAHVVVVELEEEDVKGIGEC*TPYPR.Y	45
Q8ZP65	tpx	R.FC*GAEGLSNVITLSTLR.N	95
Q8ZP65	tpx	K.RKVLNIFPSIDTGVC*AASVR.K	61
Q8ZP64	ycjF	K.AMELC*RPLPWIDNDKPR.L	316
Q8ZP57	steC	R.GIKVDVNSPEHRNC*HPDRVSK.Y	276
Q8ZP54	rnb	R.ELSDDLC*SLR.A	271
Q8ZP54	rnb	R.LSIVPDHPLLKDAIPC*R.A	112
Q8ZP51	rluB	R.VLAYYKPEGELC*TR.N	80
Q8ZP51	rluB	K.ESAEQIC*R.V	67
Q8ZP45	adhE	K.LSEDAFDDQC*TGANPR.Y	841
Q8ZP45	adhE	K.LGSQFHIPHGLANALLIC*NVIR.Y	746
Q8ZP45	adhE	R.VHSAATIAGIAFANAFLGVC*HSM#AHK.L	722
Q8ZP45	adhE	K.LAPSLTLGC*GSWGGNSISENVGPK.H	421
Q8ZP45	adhE	K.LVAM#GGIGHTSC*LYTDQDNQPER.V	370
Q8ZP43	ychJ	K.SWHPTC*NAAAFRDDIIAGFANTR.W	57
Q8ZP43	ychJ	R.NDPCPC*GSGK.K	140
Q8ZP43	ychJ	R.NDPC*PCGSGK.K	138
Q8ZP21	STM1795	R.TAAYIVAC*ER.I	426
Q8ZP21	STM1795	R.QRAEALTC*K.L	333
Q8ZP21	STM1795	K.C*AALNLPYGGAK.G	119
Q8ZP17	dadA	R.LPNDETGDC*QLFTQR.L	200
Q8ZP15	fadR	K.LSSLC*EQGAHDQVYETVR.R	200
Q8ZP10	minD	R.NLDLIM#GC*ER.R	52
Q8ZNZ7	kdgR	R.C*IGVPVFDR.F	208
Q8ZNZ5	yebR	R.IDDVHAFDGHIAC*DAASNAEIVLPVTVGER.I	129
Q8ZNZ5	yebR	R.GVC*GAAVAQNK.V	105
Q8ZNZ4	yebS	R.VCLGC*HFSGYPDAKGR.C	236
Q8ZNY6	STM1857	R.KGC*VHGLVDTFSFQALPFYEK.Q	94
Q8ZNW4	eda	R.TAC*AMDAIR.A	52
Q8ZNW2	zwf	R.VGEYFEEC*QVYR.I	170
Q8ZNW2	zwf	R.TTINYFAMPPSTFGAIC*K.G	128
Q8ZNW0	pykA	R.VC*LGAEKIPSINVSK.H	338
Q8ZNW0	pykA	R.DAGC*DAK.I	216
Q8ZNW0	pykA	R.C*GEDLNYAR.R	200
Q8ZNV2	aspS	-.MRTEYC*GQLR.L	6
Q8ZNV2	aspS	R.LSHVGQQVTLC*GWVNR.R	21
Q8ZNV0	cutC	R.AFDMC*ANPFNALK.N	127
Q8ZNU9	yecM	R.C*HQNTTAER.W	47
Q8ZNU3	yecA	K.VGRNDPCPC*GSGKK.F	209
Q8ZNU3	yecA	K.VGRNDPC*PCGSGK.K	207
Q8ZNT8	yecC	R.C*INLLEQPEAGTIK.V	48
Q8ZNS0	amn	R.FTHPGC*YTTTVTRPALFR.A	82
Q8ZNR3	sopA	R.FFAHQC*QTYNDVPLPAPDTYYQQR.I	430
Q8ZNR2	sbcB	K.TC*VVGYNNVR.F	99
Q8ZNP8	baeR	R.LLGLEIGADDYIC*KPYSPR.E	109
Q8ZNP1	yegS	R.QAGGGQQLC*PTALINDGLLQLR.I	211
Q8ZNP0	yegU	K.ENNAAC*YFNR.A	52
Q8ZNN5	apbC	K.EQC*SADLLR.I	70
Q8ZNN5	apbC	K.VEVPVLGIVENMSMHIC*SNCGHHEPIFGTGGAQK.L	283
Q8ZNN4	metG	R.GHEVNFIC*ADDAHGTPIMLK.A	50
Q8ZNM7	dld	K.SAEGGFFTC*TPEEGSK.A	422
Q8ZNM7	dld	R.YNADPDRLFESSGC*AGK.L	256
Q8ZNM7	dld	K.ALKPLGREPHSVIGSSCIGASVIGGIC*NNSGGSLVQR.G	156
Q8ZNM7	dld	K.ALKPLGREPHSVIGSSC*IGASVIGGICNNSGGSLVQR.G	146
Q8ZNM0	cdd	K.SHMPYSHSPSGVALEC*KDGR.I	217
Q8ZNL8	preT	R.ENNALGAVC*AR.V	73
Q8ZNK8	yeiE	R.HGLGISC*LSR.R	236
Q8ZNK5	fruA	K.RVVAVTAC*PTGVAHTFMAAEAIETEAK.K	111
Q8ZNH6	napA	R.VVAC*QGDPDAPVNR.G	67
Q8ZNG6	glpT	R.DTPQSC*GLPPIEEYKNDYPDDYNEK.A	215
Q8ZNG5	glpA	R.EC*ISENQILKR.I	71
Q8ZNG5	glpA	R.WVYQGLC*GLEK.E	532
Q8ZNG5	glpA	R.VGM#GTCQGELCAC*R.A	477
Q8ZNG5	glpA	R.VGM#GTCQGELC*ACR.A	475
Q8ZNG5	glpA	R.VGM#GTC*QGELCACR.A	470
Q8ZNG5	glpA	R.KLGNTRPC*ITADTPLPGSK.E	379
Q8ZNG5	glpA	R.LM#AEWATDAVC*R.K	370
Q8ZNG5	glpA	R.DSQTSDVIIIGGGATGAGIARDC*ALR.G	27
Q8ZNG5	glpA	R.C*RKPSDADILVPGDTISLIGTTSTHIDYNEIDSNR.V	248
Q8ZNG5	glpA	R.EGATVC*GVHVR.N	185
Q8ZNG5	glpA	R.AC*EAAGIR.A	111
Q8ZNG4	glpB	R.WLNERLPC*ALTLLPTLPPSVLGIR.L	241
Q8ZNG3	glpC	K.RCEVAC*PSDVK.I	66
Q8ZNG3	glpC	R.C*EVACPSDVK.I	62
Q8ZNG3	glpC	R.C*EHPITLLAQALG.-	384
Q8ZNG3	glpC	R.QIPGLELTVLDSQCC*GIAGTYGFK.K	330
Q8ZNG3	glpC	R.QIPGLELTVLDSQC*CGIAGTYGFKK.E	329
Q8ZNG3	glpC	K.VVYHTPC*HMEK.M	299
Q8ZNG3	glpC	K.GIPVIATSSTC*TFALRDEYPEVLDVDNAGLR.E	244
Q8ZNG3	glpC	K.EKC*CGVPLIANGFTDK.A	201
Q8ZNG3	glpC	K.CTVCTTAC*PVSR.V	19
Q8ZNG3	glpC	K.CTVC*TTACPVSR.V	15
Q8ZNG3	glpC	K.C*TVCTTACPVSR.V	12
Q8ZNF9	rhmD	K.C*VSDIK.L	108
Q8ZNF7	STM2293	R.QEVC*AMMALNMLR.R	366
Q8ZNF7	STM2293	R.FSLPEPPLC*LR.L	181
Q8ZNF3	arnB	K.NQELEAAFC*R.L	49
Q8ZNF3	arnB	K.NITC*AEGGIVVTDNPQFADKLR.S	192
Q8ZNE8	menD	K.LILLTADRPPELIDC*GANQAIR.Q	114
Q8ZND6	pta	R.GIATC*VLLGNPDEINR.V	431
Q8ZND6	pta	R.TVKAAAIC*AERGIATCVLLGNPDEINR.V	423
Q8ZND5	STM2340	K.VIASDAGVTAC*HNGGTHMSFEDMGIVR.G	121
Q8ZND4	STM2341	K.GQGVPC*LEQLTNSHHLR.L	244
Q8ZNC9	yfcG	R.ALLQAQLHC*NSTK.A	210
Q8ZNC0	folC	R.LDILKPAPFVFTVAGTNGKGTTC*R.T	64
Q8ZNC0	folC	K.SVVDDWYC*APLEGPR.G	354
Q8ZNB9	truA	K.ALSQVANEPINVFC*AGR.T	55
Q8ZNA8	sixA	R.HGDAALDAASDSVRPLTPCGC*DESR.L	28
Q8ZNA8	sixA	R.HGDAALDAASDSVRPLTPC*GCDESR.L	26
Q8ZNA8	sixA	K.GTFNWQMSPC*NLK.M	153
Q8ZNA7	fadJ	K.ADNFIAGADINMIGHC*QNAQEAETLAR.Q	77
Q8ZNA6	fadI	R.EVLGC*AQATGEVDDAKFNVLGGSIAYGHPFAATGAR.M	369
Q8ZNA2	yfdZ	R.RRGEDIIDFSMGNPDGATPPHIVEKLC*TVAQRPDTHGYSTSR.G	59
Q8ZNA2	yfdZ	K.VC*VSPGIGFGDYGDTHVR.F	357
Q8ZN83	talA	R.TEQILALTGC*DRLTISPNLLK.E	238
Q8ZN82	tktB	K.AILEAQSVKDKPSLIIC*R.T	242
Q8ZN75	dapE	R.RPSLSPDDAGC*QALMIER.L	25
Q8ZN71	dapA	K.LFVEPNPIPVKWAC*K.A	256
Q8ZN71	dapA	R.EMADMC*KLAAEGQFAEAR.A	218
Q8ZN71	dapA	K.AIAEHTDLPQILYNVPSRTGC*DMLPETVGR.L	141
Q8ZN71	dapA	R.FNDSGIVGC*LTVTPYYNRPTQEGLFQHFK.A	100
Q8ZN70	gcvR	R.HVSSC*GCNIEDSR.L	54
Q8ZN59	guaB	K.VGIGPGSIC*TTR.I	305
Q8ZN54	yfgJ	K.AC*GAVDYFCQNGHGLISK.K	47
Q8ZN40	iscS	K.DLAVSSGSAC*TSASLEPSYVLR.A	328
Q8ZN40	iscS	K.AVLDTC*R.Q	111
Q8ZN35	cadC	K.LTAPVIWC*EENSDEIDNSSTSPPPPIAATNAEPTEGVTAATPVPPASLQTPTKK.A	107
Q8ZMX7	srmB	R.LAGINNC*YLEGEM#AQIKR.N	276
Q8ZMX7	srmB	R.LLQYIKEENFDC*R.A	148
Q8ZMX4	trxC	R.C*GHELFDGEVINATGETLDK.L	28
Q8ZMW7	pheA	K.VLGC*YPSENVVPVEPA.-	374
Q8ZMW7	pheA	R.HFEQFIESGC*AK.F	136
Q8ZMQ8	STM2746	K.NKELDVDYFDEIYNKLLIC*DNIDSDPILK.S	122
Q8ZMM8	pipB2	R.EIPLASFEKIC*R.A	128
Q8ZMM2	gabD	R.NAGQTCVC*ANR.L	291
Q8ZMM2	gabD	R.NAGQTC*VCANR.L	289
Q8ZMM2	gabD	R.QLMEQC*AK.D	245
Q8ZMM2	gabD	R.KAGPALAAGC*TMVLKPASQTPFSALALAELAQR.A	175
Q8ZMM1	gabT	K.KLSHTCFQVLAYEPYLALC*ER.M	90
Q8ZMM1	gabT	K.LSHTC*FQVLAYEPYLALCER.M	77
Q8ZMM1	gabT	R.EKGLILLSC*GPYYNILR.I	390
Q8ZMM1	gabT	R.AENC*RVWDVEGR.E	33
Q8ZMM1	gabT	R.ALC*DQHGIMLIADEVQSGAGR.T	229
Q8ZMM1	gabT	R.ALYPC*PLHNISDDDAIASIER.I	173
Q8ZML4	ygaM	K.QAACDAM#GC*ADTFVR.E	81
Q8ZML4	ygaM	K.QAAC*DAMGC*ADTFVR.E	76
Q8ZMK6	alaS	R.VLSMGDFSTELC*GGTHASR.T	666
Q8ZMK6	alaS	R.LYDTYGFPVDLTADVC*RER.N	413
Q8ZMK6	alaS	R.SC*AFLVADGVLPSNENR.G	291
Q8ZMK4	ygaD	R.GATVTTAESC*TGGWLAK.A	30
Q8ZMI7	hypB	R.LPLDDHGILFIENVGNLVC*PASFDLGEK.H	198
Q8ZMI7	hypB	R.ATGTPAIQVNTGKGC*HLDAQMIADAAPR.L	166
Q8ZMI7	hypB	R.VPC*AVIEGDQQTVNDAAR.I	134
Q8ZMH6	STM2903	R.NYDC*NPK.L	55
Q8ZMG7	STM2914	R.AASSFVSAIIREPLQGETTVC*PVSESLR.L	202
Q8ZMF6	ispD	K.AQWVLVHDAARPC*LHQDDLAR.L	111
Q8ZME2	relA	K.EC*TNIYAPLANR.L	178
Q8ZMD6	STM2963	R.YGVIALGDSSYPNFC*NGGK.Q	101
Q8ZMD3	queF	K.SNC*LITHQPDWGSIQIQYR.G	190
Q8ZMD2	ygdH	R.NC*SLAVLNSGSLTDNSK.E	37
Q8ZMD2	ygdH	R.ELNICTGC*GPGAMEAPMK.G	185
Q8ZMD2	ygdH	R.ELNIC*TGCGPGAMEAPMK.G	182
Q8ZMD2	ygdH	R.ALHVGEAPNMVVC*WGGHSINENEYLYAR.R	153
Q8ZMD0	sdaB	R.VVTAPTNGAC*GIVPAVLAYYDK.F	290
Q8ZMD0	sdaB	R.HC*QETGLSLSGLMMQNELALHSK.E	181
Q8ZMD0	sdaB	R.LLLANGQHEVEFPVDKC*MNFHADNLSLHENGMR.I	112
Q8ZMC6	fucI	R.HAC*GAQVECVIADTCIAGM#AESAACEEK.F	49
Q8ZMA9	thyA	K.MALAPC*HAFFQFYVADGK.L	146
Q8ZMA6	tas	R.LQTDYLDLYQVHWPQRPTNC*FGK.L	140
Q8ZMA1	ygeA	K.IAHVIESRC*SLPFLHIADATGR.A	97
Q8ZMA1	ygeA	R.INQVIFDELC*QGTFTDASR.H	166
Q8ZM82	idi	K.KAWPGVWTNSVC*GHPQQGETTEEAIIRR.C	67
Q8ZM82	idi	R.LLNYC*QR.-	179
Q8ZM80	ygfZ	K.YIQGQVTADVSQMTEQQHLLAAHC*DAK.G	63
Q8ZM80	ygfZ	K.GC*YTGQEM#VAR.A	228
Q8ZM76	gcvP	K.RLDDVYGDRNLFCSC*VPISDYQ.-	950
Q8ZM76	gcvP	K.RLDDVYGDRNLFC*SC*VPISDYQ.-	948
Q8ZM76	gcvP	R.VAHEC*ILDIRPLKEETGISELDIAKR.L	815
Q8ZM76	gcvP	K.LTGYDAVC*M#QPNSGAQGEYAGLLAIR.H	566
Q8ZM76	gcvP	R.KDLALNQAMIPLGSC*TMK.L	512
Q8ZM73	ubiH	R.KAPGVTLHC*PER.V	129
Q8ZM72	pepP	R.YPSYNTIVGSGENGC*ILHYTENESEMR.D	238
Q8ZM72	pepP	R.AMEKC*RPGMFEYQLEGEIHHEFNR.H	200
Q8ZM71	ygfB	R.VAALLC*HDTFTR.Q	172
Q8ZM67	STM3071	R.QPC*AISGYDELHISSR.-	128
Q8ZM63	tktA	R.VTPNMSTWRPC*DQVESAVAWK.Y	494
Q8ZM63	tktA	R.AVTDKPSLLMC*K.T	243
Q8ZM52	yggJ	R.IYHPELLTSGTQISLC*EDAANHIGR.V	37
Q8ZM52	yggJ	R.NRVPEIRPPMALEAWC*AEQDSGLK.L	176
Q8ZM52	yggJ	K.IAIAACEQC*GR.N	158
Q8ZM52	yggJ	R.C*GVKLDSER.L	131
Q8ZM45	rdgB	R.HAEDPTPIVC*HGSWPGVITR.Q	136
Q8ZM41	yggL	K.C*TEEHQAIVR.K	77
Q8ZM40	trmB	K.ARPEQNFLGIEVHSPGVGAC*LASANEEGVENLR.V	103
Q8ZM22	STM3138	R.NAIIKSC*EQLNIEKER.I	66
Q8ZM22	STM3138	K.ITM#HDQC*R.L	272
Q8ZM22	STM3138	R.MGDLNTSLTQINAC*IKEIQK.I	124
Q8ZM22	STM3138	K.SLVEFITEIGTTSSDIGC*R.M	109
Q8ZM16	hybC	K.TVEVGPLANMLC*K.L	385
Q8ZM12	STM3154	R.RC*SDLNSAVYK.Y	104
Q8ZM09	yghA	K.ALIEEC*GRK.A	98
Q8ZM09	yghA	K.MTPVPDC*GEK.S	36
Q8ZM06	dkgA	K.SIGVC*NFQIHHLQR.L	138
Q8ZLZ6	icc	R.APC*VWLPGNHDFQPAMYSALQEAGISPAKR.V	88
Q8ZLZ6	icc	R.LLASPSTCVQFKPHC*ANFTLDTIAPGWR.T	231
Q8ZLZ6	icc	R.LLASPSTC*VQFKPHCANFTLDTIAPGWR.T	224
Q8ZLY1	yqjH	K.VFFPEPGC*R.F	64
Q8ZLX7	patA	K.MFAC*EHENVQPDILCLAK.A	286
Q8ZLX3	ygjR	K.ALLNYC*QYSSR.Y	150
Q8ZLW6	yhaK	R.EALTC*GDGAFIRDEPNITLVADTPLR.A	204
Q8ZLV8	garR	K.AIAEQC*DVIITMLPNSPHVK.E	59
Q8ZLU5	yraL	R.VVPLPGPCAAIAALSAAGLPSDRFC*YEGFLPAK.S	140
Q8ZLT2	truB	R.TIIDDLGEKLGC*GAHVTYLR.R	193
Q8ZLS3	yrbF	R.C*IFDNISLTVPR.G	22
Q8ZLR8	rapZ	R.ALEDMGFYC*VDNLPVVLLPDLAR.T	28
Q8ZLR6	yhbL	R.SGAQAVC*FAPDKPQADVINHLTGEAMAETR.N	38
Q8ZLR6	yhbL	K.AMHQSGKPLGFIC*IAPAMLPK.I	135
Q8ZLR6	yhbL	K.NLSNFASQGSEC*RVDSDVVALAK.A	111
Q8ZLR5	arcB	R.NEDKEFSGC*NR.A	180
Q8ZLR4	gltB	K.AAILGAESFGFGTGPMVALGC*K.Y	1102
Q8ZLQ7	nanE2	K.ALHDAGC*R.V	179
Q8ZLM7	def	K.SGETGIEEGC*LSIPEQR.A	91
Q8ZLM6	fmt	K.LAC*PITAEDTSGSLYNK.L	157
Q8ZLM6	fmt	R.LGC*INVHGSLLPR.W	107
Q8ZLM3	zntR	R.IDPEHHTC*QESK.S	79
Q8ZLM1	rpsM	K.RLM#DLGC*YR.G	85
Q8ZLL9	tusB	-.M#LHTLPHC*ASSVDFPALLR.L	8
Q8ZLL2	yheS	R.LNLAQALIC*R.S	166
Q8ZLK9	yhfA	K.GRQNVTNC*EVK.L	66
Q8ZLK9	yhfA	R.AVDLSAEKYC*SVALMLEK.A	113
Q8ZLH4	glpD	R.GLSVLM#LEAQDLAC*ATSSASSK.L	39
Q8ZLH4	glpD	K.TC*VLPGGDIDGSREDYAAK.L	384
Q8ZLH4	glpD	K.QLGRDDIVWTYSGVRPLC*DDESDSPQAITR.D	320
Q8ZLH4	glpD	R.GFEYSDC*WVDDAR.L	144
Q8ZLG8	STM3533	R.C*IAVPVFNTQGK.V	202
Q8ZLG7	glgP	R.SYVDC*QDKVDELYR.R	766
Q8ZLG7	glgP	R.TDLSQLSELKQHC*DYPLVNHAVR.Q	507
Q8ZLG7	glgP	R.LAAC*FLDSLATLGLPGR.G	132
Q8ZLG6	glgX	R.NLTTGEFAC*R.F	416
Q8ZLG5	glgB	R.IKADPYAFEAQMRPETASMIC*GLPEKVTPGEER.Q	221
Q8ZLD7	uspA	K.KYDMDLVVC*GHHQDFWSK.L	109
Q8ZLD4	gor	K.ELGGTCVNVGC*VPK.K	47
Q8ZLD4	gor	K.ELGGTC*VNVGC*VPKK.V	42
Q8ZLD4	gor	K.LVC*VGPEEK.I	395
Q8ZLD4	gor	K.SSFTAM#YTAVTTHRQPC*R.M	389
Q8ZLD4	gor	K.C*ALIEAK.E	30
Q8ZLD1	STM3600	R.HYTGENGYAC*IR.L	82
Q8ZLD0	STM3601	R.AC*EQVAER.A	172
Q8ZLB6	bcsQ	R.QLVSLC*DHTLAIAR.V	140
Q8ZLB2	dppF	K.TLAVVGESGC*GK.S	59
Q8ZLB2	dppF	R.IKLTGELPSPLNPPPGC*AFNAR.C	293
Q8ZLB1	dppD	K.C*HYPLDDAGRPTL.-	315
Q8ZL99	STM3650	R.THPC*FNHSLSGCQGEMPNKPFTVK.V	96
Q8ZL99	STM3650	R.THPCFNHSLSGC*QGEM#PNKPFTVK.V	104
Q8ZL96	glyS	R.GC*GITVDQAER.L	98
Q8ZL96	glyS	R.FAGDDLPSNPVAC*ALAIADKMDTLAGIFGIGQHPK.G	450
Q8ZL95	glyQ	R.QGCTIVQPLDMEVGAGTSHPMTC*LR.A	45
Q8ZL95	glyQ	R.EALGFPMC*NKDK.-	299
Q8ZL95	glyQ	R.QGC*TIVQPLDMEVGAGTSHPMTCLR.A	25
Q8ZL84	yiaJ	R.LLQGLQSC*GYVTPAPAAGSYR.L	59
Q8ZL84	yiaJ	R.ETSMAMDREENELGVSC*IAVPVFDIHHR.V	212
Q8ZL72	aldB	K.ARYDNFIGGDWVAPADGEYYQNLTPVTGQPLC*EVASSGK.K	54
Q8ZL72	aldB	K.C*LLVSYSDKPLGLF.-	499
Q8ZL72	aldB	R.VWTNC*YHAYPAHAAFGGYK.Q	464
Q8ZL72	aldB	K.ALEGFALFAFNQGEVC*TCPSR.A	307
Q8ZL72	aldB	K.MAPALAAGNC*VVLKPAR.L	190
Q8ZL71	STM3681	K.IASTSGLMASC*R.Q	181
Q8ZL68	yibF	R.RVAPGWC*VSRPHLVK.L	175
Q8ZL52	tdh	R.VSGEGHITCGHC*R.N	96
Q8ZL52	tdh	R.VSGEGHITC*GHCR.N	93
Q8ZL52	tdh	R.KTAIC*GTDVHIYNWDDWSQK.T	38
Q8ZL52	tdh	R.NTTGVGVNRPGC*FAEYLVIPAFNAFK.I	120
Q8ZL49	kdtA	R.GGHNPLEAAAHAIPVLMGPHTFNFKDIC*AR.L	359
Q8ZL47	dfp	R.GLFIWGPDSGSQAC*GDVGPGR.M	159
Q8ZL41	spoT	K.GLVIHHESC*R.N	600
Q8ZL08	dsdA	R.IC*ASVAYQQR.H	396
Q8ZL08	dsdA	R.VVDASHPLFVYLPC*GVGGGPGGVAFGLK.L	276
Q8ZL08	dsdA	R.KAAQSDPNC*FFIDDENSR.T	231
Q8ZL00	ccmH	R.EPLPADTPVC*GAR.A	145
Q8ZKY9	dgoR	K.YVPGSALPAEADLC*EEFETSR.N	35
Q8ZKX9	yieF	R.C*QYHLR.Q	132
Q8ZKX7	yieH	K.TPM#C*VVSNGPVSK.M	105
Q8ZKX0	glmU	K.AGHLTYLGDAEIGDNVNIGAGTITC*NYDGANKFK.T	385
Q8ZKW8	atpG	K.AWSDKGVQC*ELAMIGSK.G	113
Q8ZKW6	mnmG	R.MGQQTLLLTHNIDTLGQMSC*NPAIGGIGK.G	47
Q8ZKW4	asnA	R.VGDGTQDNLSGC*EK.A	51
Q8ZKV8	rbsK	R.SGANIAFIAC*TGDDDIGDSIR.K	63
Q8ZKV5	yieP	R.ISLEPQAC*LLAATLGTPEQK.A	119
Q8ZKT0	fdhE	K.AESCGDC*GTYLK.I	258
Q8ZKT0	fdhE	K.AESC*GDCGTYLK.I	255
Q8ZKS2	STM4044	K.ALADPCAPC*NPR.T	364
Q8ZKR0	STM4068	R.GSGSVVC*SVPEGVSYGHTFR.G	75
Q8ZKQ6	lsrK	K.AAIPATAIAAVSAC*SMR.E	90
Q8ZKQ6	lsrK	R.C*SGQTLALSAIPR.L	138
Q8ZKQ5	lsrR	R.ASSQEIAC*TLR.N	184
Q8ZKQ0	lsrF	K.GC*GALDWGMQSR.L	29
Q8ZKQ0	lsrF	R.IAAGC*PVPIVIAGGK.K	218
Q8ZKP9	lsrG	K.TTPHYKTC*VEQLEPLMTGPR.T	74
Q8ZKP8	lsrE	R.VAQLLC*LLGDKR.E	185
Q8ZKP7	tpiA	K.ELTGVAGC*DVAIAPPEMYIDLAK.R	36
Q8ZKP7	tpiA	K.EQGLTPVLCIGETEAENEAGKTEEVC*AR.Q	143
Q8ZKP7	tpiA	K.EQGLTPVLC*IGETEAENEAGKTEEVCAR.Q	126
Q8ZKP4	glpX	K.ALC*LGDMAR.S	268
Q8ZKP3	glpK	K.NTYGTGC*FMLM#NTGEK.A	270
Q8ZKP3	glpK	R.IPIAGIAGDQQAALFGQLC*VK.E	256
Q8ZKP3	glpK	R.RTADIC*EQLKR.D	113
Q8ZKP3	glpK	R.ETGKPIYNAIVWQC*R.R	106
Q8ZKP2	glpF	R.HLPCDTC*VVEEKDSTATTQQNASL.-	264
Q8ZKM5	frwB	K.IIAVTAC*PSGVAHTYMAAEALESAAK.A	10
Q8ZKM0	ppc	K.VVEDGKQSELEAMC*RDWPFFSTR.L	754
Q8ZKM0	ppc	R.VKC*FGVPLVR.I	385
Q8ZKM0	ppc	K.MGEINNC*LKQLDNTDIADYER.H	157
Q8ZKL9	argE	R.LTVAELHPPIPGYEC*PPDHQLVEVVEK.L	307
Q8ZKL9	argE	K.TTALRPDC*AIIGEPTSLQPIR.A	164
Q8ZKL4	aceB	K.NQLFITRDEDAPITAEQLLEPC*EGER.T	409
Q8ZKL4	aceB	K.IYQLKPDPAVLIC*R.V	165
Q8ZKI5	lysC	K.AC*GVGKEVFGVLEPFNIR.M	400
Q8ZKI5	lysC	R.SDIPVFVGSSKDPQAGGTLVC*NK.T	290
Q8ZKI4	pgi	K.MVPC*DFIAPAITHNPLSDHHQK.L	401
Q8ZKI0	ubiC	R.EILLC*ADGEPWLAGR.T	82
Q8ZKI0	ubiC	R.TVVPESTLC*GPEQVLQHLGK.T	101
Q8ZKH9	plsB	R.AQC*LAHDLPDPLEPLEIDGALLPR.Y	60
Q8ZKH9	plsB	R.QLAHDGHEIVYVPC*HR.S	305
Q8ZKH6	zur	K.TTTQELLAQAEKLC*AQR.N	17
Q8ZKH6	zur	R.CGVVKEEC*AEGVEDIMHTLAAK.M	113
Q8ZKH4	dusA	K.GDYLAYSEEEHPVALQLGGSDPAQLAHC*AK.L	83
Q8ZKG5	STM4262	R.VAVVGEC*GAGK.S	502
Q8ZKF6	acs	R.MC*QVVDKHQVNILYTAPTAIR.A	343
Q8ZKF6	acs	K.HAIPANIADRC*LINPEQYETK.Y	17
Q8ZKE5	phnB	K.LSFGEMPPSAADNEEGC*PSGMRFPDTAIAHANMR.I	48
Q8ZKE2	fumB	K.QC*ANCAK.-	543
Q8ZKE2	fumB	K.HLEC*VEYPELGMEAIWK.I	502
Q8ZKE2	fumB	R.TLGTAAC*PPYHIAFVIGGTSAESTLK.T	224
Q8ZKE2	fumB	K.GILPTC*QDTGTAIIM#GK.K	105
Q8ZKB5	blc	R.HALVC*GPDRDYLWILSR.T	131
Q8ZKB4	frdB	R.MAICGSC*GMMVNNVPK.L	66
Q8ZKB4	frdB	R.MAIC*GSCGMMVNNVPK.L	63
Q8ZKB4	frdB	R.MAQLNSPNGVWTCTFVGYCSEVC*PK.H	215
Q8ZKA7	yjeF	K.FTPYDAACVGC*VAHGAAADLLAAR.Y	466
Q8ZKA7	yjeF	K.FTPYDAAC*VGCVAHGAAADLLAAR.Y	463
Q8ZKA7	yjeF	R.LLGC*SVAEIESDR.L	385
Q8ZKA3	nsrR	R.ELEPLSLVNC*SSEFCHITPACR.L	91
Q8ZKA3	nsrR	R.LGKPANTIC*IGDVVR.E	75
Q8ZKA3	nsrR	R.ELEPLSLVNCSSEFCHITPAC*R.L	102
Q8ZKA2	rlmB	K.VAC*GAAESVPLIR.V	143
Q8ZK91	yjfP	K.C*GASLMGSGYFTGLAR.T	133
Q8ZK89	ulaB	R.ILAVC*GNGQGSSMIMK.M	9
Q8ZK71	msrA	R.EVC*SGQTGHAEAVR.I	87
Q8ZK67	fbp	K.LRLLYEC*NPMAFLAEQAGGK.A	276
Q8ZK67	fbp	K.YIKFC*QEEDSSTSRPYTSR.Y	224
Q8ZK67	fbp	K.ARDIVAGIASEEEDEIVVFEGC*EHAK.Y	100
Q8ZK66	mpl	R.GNPC*VEAVLEK.N	77
Q8ZK66	mpl	K.MGLC*KDDLAPSLGR.A	370
Q8ZK66	mpl	R.SKFVHYC*PR.T	177
Q8ZK34	STM4466	R.DHLVIC*NGGGGVPVVEK.A	184
Q8ZK33	arcA	R.LTPSNC*QELLFDDVLSVER.A	33
Q8ZK31	valS	R.RIPIVGDEHADMEKGTGC*VK.I	275
Q8ZK20	yjgB	R.SCGHC*DACISGNQINCQEGAVPTILNR.G	99
Q8ZK20	yjgB	R.SC*GHCDACISGNQINCQEGAVPTILNR.G	96
Q8ZK17	STM4490	K.QVVAIGWSQLAPYVKPGC*SR.E	34
Q8ZK11	STM4496	R.TITQAC*QNGILDEFDGNLLK.T	476
Q8ZK11	STM4496	K.LQTITENLGVIC*GGR.A	293
Q8ZK11	STM4496	R.VGYC*ADFPHIAHLER.E	165
Q8ZK07	yjhP	R.GFHC*TGVDFSPASITWAR.Q	92
Q8ZK07	yjhP	R.ILDLGC*GPGFYTR.L	76
Q8ZK01	uxuR	R.RGAGIYVLDSADNNEMEGADVNHC*NDAGPFELLQAR.Q	90
Q8ZJZ3	STM4519	R.LTNAGQVC*TAAKR.F	263
Q8ZJZ3	STM4519	K.HASIVPHC*AETFAHLVR.E	163
Q8ZJY8	hsdR	K.HLGQLLDIPAC*ENQHDLLR.E	58
Q8ZJY5	yjiY	K.LLAC*ETDAR.F	358
Q8ZJX0	STM4549	R.MLSSDEVVNATGHPVGGVC*PFGLEHPLPVYCDISLK.G	99
Q8ZJW6	rsmC	R.ILFAGDLQDDLPARFEC*AASR.A	39
Q8ZJW6	rsmC	R.LTLC*DVSAPAVEASR.A	226
Q8ZJW6	rsmC	K.VLDVGC*GAGVLSAALASHSPK.V	205
Q8ZJV8	deoC	K.TPVGNTAAIC*IYPR.F	47
Q8ZJV7	deoD	R.VGSC*GAVR.M	92
Q8ZJV1	lplA	R.AQNPWKEC*NTR.R	56
Q8ZJU9	yjjK	R.ALENALLEFPGC*AMVISHDR.W	493
Q8ZJU7	rob	R.C*EFLIPIRR.-	281
Q8XFG8	ppiB	K.TFDDKAPETVKNFLDYC*R.E	31
Q7DAP2	PSLT046	K.RNSIAGQYPAAVILSC*IDSR.A	97
Q7DAP2	PSLT046	R.C*AIDNAELGNLTGLLDEIKPAIAK.T	158
Q7CR86	djlA	R.GPTLEDAC*NVLGVK.T	206
Q7CR80	ftsA	K.HISC*QNEIGM#VPISEEEVTQEDVENVVHTAK.S	90
Q7CR80	ftsA	K.VAALVGEVLPDGMVNIIGVGSC*PSR.G	41
Q7CR80	ftsA	K.HHLAAGIVLTGGAAQIEGLAAC*AQR.V	347
Q7CR80	ftsA	R.HGC*ALGSIVGKDESVEVPSVGGRPPR.S	263
Q7CR80	ftsA	K.VHLITC*HNDMAK.N	163
Q7CR73	STM0164	R.IDDSSQSC*IGEHGR.K	151
Q7CR66	erpA	K.STC*GCGSSFSI.-	106
Q7CR64	yaeH	R.YVIDELDQIC*QR.D	87
Q7CR62	proS	K.ASVQGEDGRNQILTMGC*YGIGVTR.V	443
Q7CR52	crl	R.EGQC*EDNRFFFDCLAVCVNVKPAPEKR.E	28
Q7CR48	hemB	R.ESLLDEAQGADC*LMVKPAGAYLDVLR.E	243
Q7CR48	hemB	K.QTVPEMIVMSDTCFCEYTSHGHC*GVLCEHGVDNDATLANLGK.Q	130
Q7CR45	psiF	K.MREC*NVQATEQSLK.G	80
Q7CR42	STM0402	R.M#VDALQFHEEHGDVC*PAQWEK.G	171
Q7CR25	bolA	K.EWEGLQDTIFASPPC*R.G	98
Q7CQZ4	ybeF	R.QHHPC*LANAITEER.L	199
Q7CQZ1	holA	R.SVQVSC*QTPEQAQLPR.W	139
Q7CQY9	gltL	K.KGEVVVVC*GPSGSGK.S	33
Q7CQY7	phoL	K.LTGRPIC*VTAATDILR.S	68
Q7CQW6	moaB	R.TRPC*NFHPHLKK.-	162
Q7CQW2	glnQ	R.C*INKLEEITSGDLIVDGLK.V	46
Q7CQV7	ybiS	R.VSHGC*VR.L	210
Q7CQU1	pflB	R.TM#AC*GIAGLSVAADSLSAIK.Y	525
Q7CQU1	pflB	K.VSIDTSSLQYENDDLMRPDFNNDDYAIAC*CVSPMIVGK.Q	419
Q7CQU1	pflB	K.MVEGSC*K.A	123
Q7CQT9	rpsA	K.QC*KSNPWQQFAETHNKGDRVEGK.I	349
Q7CQT1	STM1078	R.DAGM#TVVMDRC*PAIEIPR.L	126
Q7CQR3	grxB	-.MKLYIYDHC*PFCVK.A	9
Q7CQR2	yceH	R.FC*NSEFGDLK.L	86
Q7CQR2	yceH	K.QVTTPEQYPLSVNGVVTAC*NQK.T	38
Q7CQR2	yceH	R.YMHLFC*GDVDELSLQTSAPESASGDLQSR.V	168
Q7CQR1	pabC	R.GYSAMNC*QAATR.I	97
Q7CQR1	pabC	R.IVDGNIC*HLEAHLQR.L	37
Q7CQP4	ydjA	R.EAFEC*RPQDKIVGFLYLGTPQLK.A	148
Q7CQP3	osmE	R.GTC*QTYILGQR.D	68
Q7CQP3	osmE	K.AETYFVALDDTGHVINSGYQTC*AEYDTDPQAPKQ.-	101
Q7CQN7	btuE	R.C*GLTPQYEQLENIQK.A	37
Q7CQM5	ssrB	K.VTELLNC*AR.R	203
Q7CQL0	cfa	K.KTDHNVDPWINKYIFPNGC*LPSVR.Q	290
Q7CQK9	ydhD	K.LPSCGFSAQAVQALSAC*GER.F	43
Q7CQK9	ydhD	K.GSPKLPSC*GFSAQAVQALSACGER.F	30
Q7CQJ6	ydfZ	K.TVIVEGC*EGK.F	52
Q7CQJ5	ydfH	R.AAAMITDNQC*YQLAQNLHLQHIAIER.K	110
Q7CQJ2	STM1541	R.ELVDSHC*AR.L	140
Q7CQI9	adhP	K.MECC*GVCHTDLHVK.N	34
Q7CQI9	adhP	K.VPEGLDSAAASSITC*AGVTTYK.A	145
Q7CQI6	yncC	K.LLNALVTGDKEASRHC*LQNVLQQNVATIK.N	203
Q7CQG7	yciT	K.GSEAIVLTDSSKFGC*VHPYPLGPLSR.F	207
Q7CQG2	yciK	R.SLRVNC*INPGGTR.T	192
Q7CQG1	yciO	R.HLPDGHNFTLMC*R.D	69
Q7CQG1	yciO	R.KGGVIVYPTDSGYALGC*KIEDKGAMER.I	42
Q7CQF9	yciF	K.C*VAM#EGLIEEANEVIESTEKNEVR.D	75
Q7CQF2	galU	K.RQLLEEVQSIC*PPHVTIMQVR.Q	98
Q7CQF2	galU	K.SHDC*GNKLGYMQAFVEYGIR.H	266
Q7CQF2	galU	R.RFDETGNSQIMVEPVEDVTAYGVVDC*KGVELAPGESVPMVGVVEKPK.A	183
Q7CQE8	ychF	K.C*GIVGLPNVGK.S	5
Q7CQE8	ychF	K.AGIEAANFPFC*TIEPNTGVVPMPDPR.L	35
Q7CQE8	ychF	K.C*LPHLAEAGMLR.S	168
Q7CQE8	ychF	R.C*FENDNIIHVAGK.V	106
Q7CQD4	sopE2	R.QTC*EAILSAVYSNNKDQCCK.L	111
Q7CQC7	yecD	R.LAEKC*R.A	44
Q7CQA9	yeeZ	K.GGHIYNIC*APAHPAR.N	213
Q7CQ98	yegQ	R.C*LLSGYINKR.D	177
Q7CQ95	yegW	R.VVSC*PDEVAQHLAIPAGSDVFLLKR.I	124
Q7CQ78	fruK	R.SQCPC*IIFDSSR.E	163
Q7CQ56	menB	R.YDDNVGVIILTGEGDKAFC*AGGDQK.V	83
Q7CQ54	elaA	R.C*PYLDVDGDDLVGDNR.H	34
Q7CQ54	elaA	K.TLESC*GR.H	103
Q7CQ51	nuoI	R.CVACNLCAVACPVGC*ISLQK.A	74
Q7CQ51	nuoI	R.IVLTRDPDGEERCVACNLC*AVACPVGCISLQK.A	66
Q7CQ51	nuoI	R.C*VACNLCAVACPVGCISLQK.A	60
Q7CQ47	yfbQ	R.NLPTAQGYC*DSK.G	69
Q7CQ47	yfbQ	R.AWELINDIPGVSC*VKPR.G	325
Q7CQ47	yfbQ	K.SSKLENVC*YDIR.G	14
Q7CQ41	accD	R.NLEVC*PK.C	46
Q7CQ41	accD	R.AVEQALEDNCPLVC*FSASGGAR.M	158
Q7CQ41	accD	R.AVEQALEDNC*PLVCFSASGGAR.M	154
Q7CQ36	fabB	R.C*MQMAM#HGVDTPIDYLNSHGTSTPVGDVK.E	280
Q7CQ36	fabB	K.IYGVNYSISSACATSAHC*IGNAVEQIQLGK.Q	169
Q7CQ36	fabB	K.IYGVNYSISSAC*ATSAHCIGNAVEQIQLGK.Q	163
Q7CQ36	fabB	K.AM#ASGVSAC*LATPFK.I	145
Q7CQ33	yfcZ	R.SVESEPC*QITPTFTEESEGVR.L	59
Q7CQ33	yfcZ	K.CSADETPVC*CCMDVGTIMDNSDCTASYSR.V	12
Q7CQ23	bcp	K.AMTPGCTVQAC*GLRDNMDELKK.A	51
Q7CQ23	bcp	K.AMTPGC*TVQACGLR.D	46
Q7CQ13	fdx	R.LSC*QAR.V	87
Q7CQ12	iscA	K.FSNPNVKDEC*GCGESFHV.-	99
Q7CQ12	iscA	K.FSNPNVKDECGC*GESFHV.-	101
Q7CQ11	nifU	R.NVGSFDNNDDNVGSGM#VGAPAC*GDVMK.L	37
Q7CQ11	nifU	K.SLDEAQAIKNTDIADELELPPVKIHC*SILAEDAIK.A	106
Q7CQ04	yfiF	R.EYDYLPEAAREPDDLC*VK.I	314
Q7CQ04	yfiF	K.QAADQDC*VLALEDVANPHNLGGMMR.S	198
Q7CQ04	yfiF	R.VYGENAC*QALFQSRPDAIVR.A	116
Q7CQ03	pssA	R.IGAAASNTNADWYC*R.L	110
Q7CQ01	clpB	R.AGLSDPNRPIGSFLFLGPTGVGKTELC*K.A	615
Q7CQ01	clpB	R.GELHC*VGATTLDEYRQYIEKDAALER.R	310
Q7CPZ8	tyrA	K.TLC*PSLRPVVIVGGGGQMGR.L	95
Q7CPZ7	ffh	R.IAQGC*GMQVQDVNR.L	406
Q7CPY9	emrR	R.LC*MHMQGK.L	33
Q7CPY9	emrR	K.GQAFLQEVLPPQHHC*LHQLWSSLSTAEKDQLEHITRK.L	135
Q7CPY9	emrR	R.RC*LHLQLTEK.G	112
Q7CPY7	yqaB	K.SILLDC*VEPLPLVEVVK.A	86
Q7CPY4	srlR	K.C*SVEELAQYFDTTGTTIR.K	20
Q7CPW5	ptpS	K.ETC*TAGCVYRGE.-	111
Q7CPW4	ygcF	R.LQGCPVGC*AWCDTK.H	35
Q7CPV7	ygdK	K.QLPALPDEC*KAQAK.E	51
Q7CPV3	rcnR	K.M#LDEPHEC*AAVLQQIAAIR.G	35
Q7CPU9	zapA	R.VNC*PPDQR.D	19
Q7CPU6	fba	K.ENNFALPAVNC*VGTDSINAVLETAAK.V	37
Q7CPU6	fba	K.TDVPQGAAILGAISGAHHVHQM#AEHYGVPVILHTDHC*AK.K	112
Q7CPU5	epd	K.TLVWC*DNEWGFANR.M	316
Q7CPT1	gsp	K.NIYQQLWC*LPK.V	571
Q7CPT1	gsp	R.C*GSNIDLVSHQEELLDKTSGK.F	538
Q7CPS8	hypO	R.LIHEHC*ER.R	232
Q7CPS1	ygiB	K.SDETVSLYQNADDC*SAANPGK.S	53
Q7CPS0	ygiC	K.LTLAQVEKLEDVTAELHQMC*LK.V	59
Q7CPS0	ygiC	R.EQYGFQLLHLTCC*RDTVEDR.G	179
Q7CPS0	ygiC	R.EQYGFQLLHLTC*CRDTVEDR.G	178
Q7CPR9	hldE	R.YWYGPTC*R.I	30
Q7CPR9	hldE	R.GATLLTPNLSEFEAVAGKC*KSEDELVER.G	206
Q7CPR7	mug	R.VVFC*GINPGLSSANTGFPFAHPANR.F	15
Q7CPQ5	yhbO	R.DFVNSGKPVFAIC*HGPQLLISADVIR.G	104
Q7CPP9	glmM	R.NHMSLHDLC*SGMK.M	363
Q7CPP9	glmM	K.VVVDC*ANGATYHIAPNVLR.E	181
Q7CPP8	yhbY	R.ETGAC*NVQVIGK.T	86
Q7CPP6	ispB	R.LFEAAAQCSGILAGC*TPEQEK.G	188
Q7CPN9	yhbG	R.ETLAVC*ER.A	204
Q7CPN8	ptsN	R.SGVHC*QSK.K	25
Q7CPN8	ptsN	-.M#INNDTTLQLSSVLNQEC*TR.S	18
Q7CPN8	ptsN	R.LADKTIC*R.R	137
Q7CPM6	yhcS	K.IYYQGC*R.R	69
Q7CPM5	tldD	K.LDNGVGVC*GK.E	454
Q7CPM4	cafA	R.TAAEGVC*EEDLASDAAYLKR.V	178
Q7CPM1	accB	K.VNVGDTLC*IVEAMKMMNQIEADKAGTVK.A	116
Q7CPM0	accC	K.HVLLADETVC*IGPAPSVK.S	50
Q7CPM0	accC	K.LIC*YGENRDVAIAR.M	390
Q7CPM0	accC	R.GHAVEC*R.I	337
Q7CPM0	accC	R.AC*KELGIK.T	21
Q7CPL5	rplN	R.RPDGSVIRFDGNAC*VILNNNSEQPIGTR.I	84
Q7CPL5	rplN	R.RVMC*IKVLGGSHRR.Y	21
Q7CPL2	yheO	R.MLHDMTGADSSVSKC*YFTR.A	99
Q7CPL0	STM3461	K.INHGNLC*R.-	102
Q7CPK4	gntK	K.SAVASAVAHQLHAAFLDGDFLHPRC*NIEK.M	46
Q7CPJ2	pitA	K.AVTGVDQLIPSPEPGATEPTEFHC*HPANTINALNR.A	306
Q7CPH8	secB	R.EC*ITSLVSR.G	113
Q7CPH7	grxC	R.TTVPQIFIDAQHIGGC*DDLYALDAR.G	66
Q7CPH7	grxC	K.ATC*PFCHR.A	12
Q7CPF5	rbsK	K.IGC*GGKGANQAVAAAK.L	36
Q7CPE7	phoU	R.TIPSVLTALFC*AR.S	195
Q7CPE7	phoU	R.IGDVADKIC*R.T	110
Q7CPE2	atpD	K.VIDLM#C*PFAK.G	138
Q7CPE1	atpA	R.IHGLADC*MQGEMISLPGNR.Y	47
Q7CPE0	mioC	R.EYDTFC*GAIEK.I	99
Q7CPD4	pepQ	K.AWVPVTQVPNC*WLLVDGVNKPK.L	68
Q7CPC9	yihV	R.AGIPDC*EQTR.S	287
Q7CPC7	yiiD	R.VTC*SAR.E	123
Q7CPC4	rhaM	R.WNAVASTDVC*QR.W	73
Q7CPB9	oxyR	R.AADSC*HVSQPTLSGQIR.K	25
Q7CPA3	STM4314	K.SC*SNLLDR.N	50
Q7CPA2	cutA	K.TTVSHQQALIDC*LK.S	82
Q7CPA1	aspA	K.VNPVVPEVVNQVC*FK.V	340
Q7CPA1	aspA	K.C*QSTNDAYPTGFR.V	141
Q7CP97	frdA	R.LDEGC*TER.D	540
Q7CP97	frdA	K.IRDEMGLSMEEGC*GIYRTPELM#QK.T	464
Q7CP97	frdA	K.GLFAVGEC*SSVGLHGANR.L	381
Q7CP97	frdA	K.AYVGVDPVKEPIPVRPTAHYTMGGIETDQNC*ESR.V	368
Q7CP97	frdA	R.LPFIC*ELAK.A	333
Q7CP97	frdA	R.DMEFVQYHPTGLPGSGILM#TEGC*RGEGGILVNKNGYR.Y	248
Q7CP94	vacB	R.QC*YALPER.L	75
Q7CP94	vacB	R.DLPLVTIDGEDARDFDDAVYC*EKK.R	285
Q7CP94	vacB	K.TC*IHGDQVLAQPLGADR.K	118
Q7CP93	ulaR	K.AASQLVNPGESVVINC*GSTAFLLGR.E	101
Q7CP84	pmbA	R.SNIQC*GSVLLPEMK.I	437
Q7CP84	pmbA	R.AMADLQAPEWVGAEC*AR.R	226
Q7CP78	ridA	R.SC*VEVAR.L	107
Q7CP63	arcA	R.AMLHFC*ENPGK.I	173
Q56121	prfC	K.IGCAPITWPIGC*GK.L	175
Q56106	fliB	R.GSVILDHYIQC*LLR.V	267
Q56106	fliB	R.NSLSLAC*PEVTSR.I	126
Q56106	fliB	K.ALSHTC*SSFPR.A	104
Q56073	dnaK	K.IIGIDLGTTNSC*VAIMDGTQAR.V	15
Q56063	prpC	K.IIRPSANYTGPEDRPFVSIDDRC*.-	389
Q56063	prpC	K.SVALSGVPAGNTALC*TVGK.S	33
Q56063	prpC	R.TGVSALGC*TLPEKEGHTVSGAR.D	119
Q56062	prpB	R.C*GHRPNK.A	123
Q56056	rnc	R.GEAHDQEFTIHC*QVSGLSEPVVGTGSSR.R	192
Q08021	yjgM	R.LGFEHISEPLGC*TGHVDCEVR.M	153
Q05632	cbiT	R.FAC*GNIDILPGEAPMTITGK.A	80
Q05603	cobT	K.AVLVMC*ADHGVWDEGVAVSPK.I	67
Q05603	cobT	R.YTC*DLAQR.G	160
Q05603	cobT	R.GC*GNIAVGPAMSR.L	134
Q05603	cobT	R.GTTGVC*VLAAQAGAK.V	100
Q05593	cbiL	R.QSLAVISC*TAPEAEIAQALQQHDSLVLMK.V	153
Q05311	uvrD	R.FIGELPEEC*VEEVR.L	640
P96069	ssaU	R.NC*IPVVENVELAR.S	302
P77980	aroB	R.AGLPVNGPC*EM#SAQDYLPHMLR.D	308
P74883	purM	R.RPEVMGGLGGFGALC*ALPQK.Y	49
P74883	purM	K.IIDVSGC*DPQTTLLEGKPLADHLLEPTR.I	206
P74881	purL	K.ATDIAHNC*GLQQVDRLER.G	98
P74881	purL	R.LRDNPQC*ADQEHEAKANDTDPGLNVK.L	1001
P74873	sptP	R.FSQWGTC*GGEVER.W	250
P74860	ssaQ	K.TGDVLPVGGC*FAPEVTIR.V	282
P74857	ssaN	R.QPITQPLM#TGIRAIDSVATC*GEGQR.V	152
P74853	ssaK	R.EQKVEQQQELAC*LRK.N	78
P74840	prpD	K.GPLNNPADRDHC*IQYMVAVPLLFGR.L	347
P69936	ydfG	-.MIVLVTGATAGFGEC*IAR.R	15
P69066	sicA	K.AC*DLYAVAFTLLK.N	91
P69066	sicA	R.QC*FELVNERTEDESLR.A	127
P69066	sicA	K.NDYRPVFFTGQC*QLLMR.K	114
P68738	nfi	R.AQQIELASSVC*REDRLDKDPPAFIGGADVGFEQGGEVTR.A	18
P68738	nfi	R.C*NPLFIATGHR.V	169
P67563	serS	R.EISSC*SNVWDFQAR.R	359
P67563	serS	R.KIILC*TGDMGFGACK.T	329
P67563	serS	K.MTAHTPC*FR.S	266
P67551	yaeP	R.YAEIASGDLGYVPDALGC*VLK.V	29
P67524	dnaT	K.LSRPGSDVALDAQFYEEPEAAPVAIPC*GK.F	86
P67520	rlmH	R.DVSLLIGGPEGLSPAC*K.A	112
P67341	ymdB	R.QQQGEC*QTGHAVITPAGK.L	60
P67197	ppsR	K.NQIPC*LNSTNYSVEEIATK.I	251
P67179	yebC	K.C*GGNLGTDGSVAYLFSK.K	120
P67091	uspF	R.HAEC*SVLVVR.-	138
P67073	ung	R.GFFGC*NHFALTNQWLEQHGEK.T	200
P67038	pheS	K.WLEVLGC*GMVHPNVLR.N	272
P66955	talB	R.NVGEILELAGC*DR.L	239
P66955	talB	R.AC*AEAGVYLISPFVGR.I	167
P66955	talB	K.EGINC*NLTLLFSFAQAR.A	153
P66869	sucC	K.IGAGPWVVKC*QVHAGGR.G	47
P66869	sucC	R.C*DLIADGIIGAVEEVGVNVPVVVR.L	325
P66869	sucC	R.YGLPAPVGYAC*TTPR.E	25
P66869	sucC	K.QGDLIC*LDGKLGADGNALFRQPDLR.E	211
P66795	qseB	R.LGADDYLC*KPFALIEVAAR.L	100
P66764	metK	R.VAC*ETYVK.T	42
P66764	metK	R.FVIGGPMGDC*GLTGR.K	240
P66692	rpiA	R.EKIIASVAEKFIC*IADASK.Q	115
P66684	rnt	R.KGIKDSGC*SR.A	112
P66541	rpsB	R.AASEAVKEAANSC*DQFFVNHR.W	87
P66451	rpsQ	R.EC*RPLSK.T	64
P66451	rpsQ	K.MHVHDENNEC*GIGDVVEIREC*RPLSK.T	53
P66409	rpsN	R.C*RQTGRPHAFLR.K	64
P66313	rplF	K.GNVVNLSLGFSHPVDHQLPAGITAEC*PTQTEIVLKGADK.Q	125
P66191	rpmE	K.C*HPFFTGK.Q	40
P66131	rpmA	K.FHAGTNVGC*GRDHTLFAK.A	53
P66030	ribA	R.C*DCGFQLEAALTHIAEEGR.G	65
P66030	ribA	R.VHSEC*LTGDALFSLR.C	54
P66008	sthA	R.YHNVGGGC*THWGTIPSK.A	45
P66008	sthA	K.EILGIHC*FGER.A	412
P66008	sthA	R.HNEEYEKIEGC*DDGVIMHLK.S	246
P66008	sthA	K.FVIAC*GSRPYHPNDVDFSHPR.I	146
P66008	sthA	R.NHC*EILQGNAHFIDEHTLALECHDGTVETLTAEK.F	110
P65977	recA	K.TC*AFIDAEHALDPVYAR.K	91
P65973	rdgC	K.QLASMTFTPC*GSQDMAK.M	35
P65921	pyrG	R.LGAQQC*QLSDDSLVR.Q	446
P65921	pyrG	R.NVAGMDNANSTEFVPDC*KYPVVALITEWRDEDGNVEVR.S	408
P65921	pyrG	K.IALFC*NVPEK.A	228
P65921	pyrG	K.ELLSIGIQPDILIC*R.S	210
P65889	purC	K.KLEMVPVEC*VVR.N	91
P65889	purC	R.LLSDTEC*LVK.K	79
P65889	purC	K.NDALHDPMVNSSYC*ETFGWVSQENLAR.M	137
P65882	purA	R.AVQLNSLSGFC*LTK.L	329
P65882	purA	R.VGAGPFPTELFDETGEFLC*KQGNEYGATTGR.R	292
P65882	purA	R.LLLSEAC*PLILDYHVALDNAR.E	104
P65840	rsuA	R.HHC*EKTYLVTLESPVADDTAAQFAK.G	128
P65836	rluD	R.VLVNGQLC*DKPKEK.V	52
P65792	proB	R.QC*AQLHAAGHR.I	35
P65792	proB	K.LQAADVAC*R.A	225
P65774	nadK	K.C*IGIVGHPR.H	7
P65774	nadK	R.RSDLEISC*DSQIALPIQEGEDVLIR.R	244
P65702	pgk	R.LLTTC*DIPVPTDVR.V	249
P65702	pgk	K.FADVAC*AGPLLAAELDALGK.A	162
P65702	pgk	K.KYAALC*DVFVMDAFGTAHR.A	133
P65692	pfkA	K.RPFKSDWMEC*AK.K	315
P65692	pfkA	R.C*VGIQNEQLVHHDIIDAIENM#K.R	284
P65692	pfkA	K.KHAIVAITEHMC*DVDELAHFIEK.E	226
P65692	pfkA	R.LTEMGFPC*IGLPGTIDNDIK.G	120
P65599	orn	K.SPIC*GNSIGQDR.R	105
P65559	yfcD	R.C*DEFTPDSLK.A	151
P65534	ndk	R.EIAFFFGEGEVC*PR.T	139
P65454	murA	K.VERNGSVHIDASQVNVFC*APYDLVK.T	81
P65454	murA	R.AEIESNTVIC*HGVETLSGAQVMATDLR.A	354
P65454	murA	R.FGQGQVSLPGGC*TIGAR.P	115
P65417	yedP	R.LHESGVPVILC*SSK.T	46
P65363	minE	R.KDILEVIC*K.Y	51
P65350	mgsA	K.HIALVAHDHC*K.Q	22
P65215	kdsA	R.IC*EHYVTVTQK.L	38
P65215	kdsA	K.C*DGPSALPLAK.L	249
P65215	kdsA	K.VSGNSPVIFDVTHALQC*RDPFGAASGGRR.G	206
P65215	kdsA	K.KPQFVSPGQM#GNIVDKFHEGGNDKVILC*DR.G	166
P64281	greA	R.EQQGFC*EGR.I	58
P64251	glpE	-.MEQFEC*ITVEEAYQK.L	6
P64222	gcvT	R.ALVEAGVKPC*GLGAR.D	219
P64076	eno	K.AAGYELGKDITLAMDC*AASEFYKDGKYVLAGEGNK.A	247
P64068	engB	R.HLPSDC*GIEVAFAGR.S	25
P63923	deoB	K.IADIYANC*GITK.K	267
P63923	deoB	K.RANLPGYLGNC*HSSGTVILDQLGEEHM#K.T	145
P63905	dcd	R.LC*DRDIEAWLDEGR.L	4
P63411	ackA	K.FAIIDAVNGDEYLSGLAEC*FHLPEAR.I	36
P63411	ackA	K.ESGLLGLTEVTSDC*RYVEDNYATK.E	286
P63411	ackA	K.C*VDTSMGLTPLEGLVMGTR.S	225
P63411	ackA	K.MLNKPVEELNIITC*HLGNGGSVSAIR.N	209
P63411	ackA	K.LVLVLNC*GSSSLK.F	11
P63365	pstB	K.NQVTAFIGPSGC*GK.S	47
P63343	ftsH	K.TTFADVAGC*DEAKEEVAELVEYLREPSR.F	157
P62405	rplE	K.IRQGYPIGC*K.V	87
P60817	yfbU	R.MLNVWHAC*PR.Q	147
P60802	pdxB	R.LKPGAILINAC*R.G	207
P60802	pdxB	R.TLLC*DPPR.A	145
P60659	speA	R.LPALFC*FPQILQHR.L	91
P60656	speB	R.TEFDKDNGFTVLDAC*QVNDRGVDDILAQVK.Q	202
P60446	rplC	K.GGVPGATGC*DLIVKPAVKA.-	199
P60428	rplB	K.C*KPTSPGR.R	6
P60428	rplB	K.VEADC*RATLGEVGNAEHMLR.V	188
P60317	proQ	R.VDLDGNPC*GELEEQHVEHAR.K	88
P60317	proQ	R.FPHC*FSAEGEARPLK.I	24
P60217	mtnN	K.VAAALGATLLLEHC*KPDVIINTGSAGGLASTLK.V	66
P60217	mtnN	K.ADDKLIAAAESC*IR.E	132
P60217	mtnN	R.YHDADVTAFGYEYGQLPGC*PAGFKADDKLIAAAESCIR.E	115
P60195	rbn	R.IFISHLHGDHLFGLPGLLC*SR.S	78
P58729	aroC	K.GRHDPC*VGIR.A	323
P58729	aroC	R.GC*LTQMGDIPLEIKDWR.Q	156
P58696	asnS	R.C*GKTFENPVFWGVDLSSEHER.Y	323
P58688	folD	K.AC*DEVGFVSR.S	58
P58679	ispH	R.DLTVFDATC*PLVTK.V	96
P58679	ispH	K.EAAC*VGVTAGASAPDILVQNVIAR.L	261
P58679	ispH	R.KDDIC*YATTNR.Q	197
P58679	ispH	R.GFC*AGVDR.A	12
P58671	ispG	R.GINFIACPTC*SR.Q	273
P58671	ispG	R.GINFIAC*PTCSR.Q	270
P58671	ispG	R.M#VVDC*AR.D	124
P58671	ispG	K.VAEYGVDC*LRINPGNIGNEER.I	104
P58627	yceF	R.FPNHLIIGSDQIC*VLDGEITGKPLTEEK.A	72
P58627	yceF	K.LTIPFEC*AAPDVDETPMPGEAPR.Q	26
P58580	gshB	R.LTEINVTSPTC*VR.E	289
P58580	gshB	R.VLVVDGEPVPYC*LAR.I	222
P58580	gshB	R.AEEEGTLIVNKPQSLRDC*NEKLYTAWFADLTPETLVTR.N	122
P58535	sgcX	R.MGIQVGTPVTLYNPPHC*LGNDLVCSK.A	168
P58533	dtd	K.IGPGLLVLLGVEKEDDEQKANRLC*ER.V	46
P58525	solA	R.EAGCAQLFNSPVSHIHHDDNGVTIETSEGC*YHASK.A	189
P58486	menC	R.AAPLC*TGDPDDLVLR.L	110
P55912	prpE	R.TIQAIC*EGRDPGDLTTIDDPASLQQIR.Q	602
P55912	prpE	R.LGSPGVPMYGYNVQLLNEVTGEPC*GINEK.G	432
P55900	serC	K.VLFC*HGGGR.G	72
P55900	serC	K.LAQQELC*DWHGLGTSVMEISHR.G	27
P55900	serC	K.KYC*APQIIDAK.I	114
P55223	FIM11	K.LVNAAC*AVSTK.S	46
P51066	aceA	R.GSVNPEC*TLAQLGAAK.M	43
P51066	aceA	K.LLAYNC*SPSFNWQK.N	318
P51066	aceA	R.GLAYAPYADLVWC*ETSTPDLELAR.R	288
P51066	aceA	R.TDADAADLITSDC*DPYDSGFITGER.T	245
P51066	aceA	K.SMIEAGAAAVHFEDQLASVKKC*GHMGGK.V	195
P41793	eutE	K.GASFDNNIIC*ADEK.V	269
P41791	eutM	R.GDVAAC*K.A	52
P41783	prgH	R.LLNSSLNGC*EFPLLTGR.T	27
P41033	pckA	K.C*TNPQWK.E	174
P41033	pckA	K.RLFIVDAFC*GANADTR.L	124
P40861	proA	R.EHGTQHSDAILTC*DMHNAAR.F	346
P40861	proA	K.TQRPSTC*NTVETLLVHQDIAER.F	253
P40861	proA	R.GGAGLHKLC*R.E	209
P40813	hsdM	K.QLC*FMQHIIETLHPGGR.A	291
P40810	ilvD	K.AC*ALITDGR.F	508
P40788	yddE	R.YFTPTVEVPIC*GHATVAAHYVR.A	72
P40783	qor	R.VVYDSVGKDTWEASLDC*LQRR.G	228
P40783	qor	R.KTYEVKPDEPFLFHAAAGGVGLIAC*QWAK.A	158
P40731	tsaD	R.RGEVFYARPEFC*TDNGAMIAYAGMVR.F	298
P40722	sopD	R.LQHLAC*PAHQDLFTIK.M	92
P40722	sopD	R.SLHIGKDGC*SR.N	310
P40720	fumA	K.RLEC*VEYPELGMEAIWK.I	502
P40720	fumA	R.TLGTAAC*PPYHIAFVIGGTSAEANLK.T	224
P40720	fumA	K.GVLPTC*QDTGTAIIVGK.K	105
P40699	spaO	R.EWLLAQTATEC*QR.H	22
P40699	spaO	R.LC*VENPVPGSALPEGK.L	104
P40680	erfK	R.VSQGC*IR.L	207
P40676	slyA	R.QTC*ASDR.R	81
P37600	phsA	R.ELAAC*APHAIVSPGHR.A	319
P37600	phsA	K.SGSLSSHLFHLATAFGSPNTFTHASTC*PAGK.A	174
P37449	pduB	R.AC*GIIVGAPASVGVLMADTALK.S	150
P37439	ptsG	K.ENITNLDAC*ITR.L	421
P37431	ubiG	K.KVLDVGC*GGGILAESM#AR.E	65
P37430	nusA	R.IDPVGAC*VGMR.G	256
P37426	nrdA	R.DGAEDAQDDLAPSIQDDGCESGAC*KI.-	759
P37426	nrdA	K.ASNELAKEQGAC*PWFNETTYAK.G	565
P37426	nrdA	R.IYIQNVDHC*NTHSPFDPVVAPVR.Q	420
P37426	nrdA	K.HFQTAVKSC*SQGGVR.G	292
P37426	nrdA	R.GGEAFHTGC*IPFYKHFQTAVK.S	278
P37421	rfaF	K.ARYPQAIIDVMAPAWC*RPLLSR.M	41
P37419	kbl	R.GSHEYC*DVMGR.V	229
P37417	murB	K.HIVC*AENEQQLLSAWQQATR.E	22
P37416	birA	R.SGDAC*VAEYQQAGR.G	107
P37415	PSLT051	R.AIC*DLSTLK.L	41
P33901	nuoF	R.YLLC*NADEMEPGTYKDR.L	89
P33901	nuoF	K.TFC*AHAPGAVEPLQSAIK.Y	398
P33901	nuoF	R.ESCGWCTPC*R.D	357
P33901	nuoF	R.ESCGWC*TPCR.D	354
P33901	nuoF	R.YIC*GEETALINSLEGR.R	180
P33321	infC	R.EALEKAEEAGVDLVEISPNAEPPVC*R.I	65
P31570	btuR	R.GC*HRDILDLADTVSELRPVK.H	163
P29946	cbiA	R.GHEFHYSDFIPETPAVMAC*R.K	411
P29847	cysE	R.ALADC*EPM#LASFYHATLLK.H	23
P28354	lysS	K.TGELSIHC*TELR.L	140
P27237	prlC	K.RGGAWMDDC*VGQMR.K	426
P27236	dcp	R.FDRIKDC*HYRPAFDEGVR.Q	25
P27236	dcp	K.AGGLAVDDAHC*LAGLSPEEMTVAAEAAR.E	191
P26979	rpoN	R.LQINQHYAAMC*NSAR.N	307
P26978	purH	R.VLTC*GQWAQR.V	367
P26978	purH	K.HANPC*GVAVSTTILDAYDR.A	292
P26978	purH	R.EGC*SLEDAVENIDIGGPTMVR.S	117
P26977	purD	R.VLC*ATALGHTVAEAQKR.A	386
P26475	asrB	R.GC*YGNGYPVDTLR.H	98
P26475	asrB	K.NRDC*VLYKEEMATWR.G	153
P26470	waaK	R.LSIPNAIAC*IK.N	42
P26470	waaK	R.LPAAAVSIVPNGFC*AETYKR.N	171
P26469	rfaC	K.HFLHC*QQAVSDPYAVFLHATTR.D	172
P26464	dnaN	R.VLPKNPDKHLEAGC*DILK.Q	260
P26464	dnaN	R.LAVC*SMPLEASLPSHSVIVPR.K	180
P26405	rfbK	R.C*YAEANLLNR.A	450
P26404	rfbM	R.LASLSTEEPVVIC*NDRHR.F	57
P26403	rfbN	R.YFDTGVFHAC*SPWIQR.D	230
P26403	rfbN	K.VAYC*AEAVVR.H	201
P26402	rfbU	R.EIADVDAIIC*SK.V	37
P26398	rfbH	K.QGLQSC*TEFLELPEATEK.S	327
P26398	rfbH	K.ITDM#QAAC*GLAQLER.V	298
P26398	rfbH	R.DCYCAPGC*DNTCGKR.F	257
P26398	rfbH	R.DCYC*APGCDNTCGK.R	253
P26398	rfbH	K.IIESFRDWGRDC*YCAPGCDNTCGKR.F	251
P26397	rfbG	R.GEDMLIC*SKR.E	345
P26397	rfbG	K.MVTLWGDDASWLLDGENHPHEAHYLKLDC*SK.A	307
P26397	rfbG	R.ENEPMGGYDPYSNSKGC*AELVASAFR.N	163
P26397	rfbG	K.AVVNITSDKC*YDNREWVWGYRENEPMGGYDPYSNSK.G	135
P26395	rfbI	R.IEGPC*GTFFIR.E	186
P26394	rfbC	R.C*AVGEVFDVAVDIRK.E	77
P26393	rmlA	K.VSC*PEEIAFR.K	253
P26392	rfbD	K.EFC*GDFSNPK.G	37
P26392	rfbD	R.QTLSVINDQYGAPTGAELLADC*TAHAIR.V	195
P26264	cysQ	K.AWKEEC*GVRK.Q	136
P26219	cdh	K.FSGNPDALREIVLEQCLPDQLQHQNPAPC*AEVKPR.A	53
P26219	cdh	R.ASAEEIQDHSC*AILSSR.-	245
P25924	cysG	R.GGEELETLC*HAGIPFSVVPGITAASGCSAYSGIPLTHR.D	318
P25924	cysG	R.AGYHC*VPQEEINQILLR.E	276
P25468	pyrD	K.NC*QQTGGLSGRPLQLK.S	260
P25468	pyrD	K.IAPDLC*EEELIQVADSLLR.H	223
P25077	mdh	K.AC*VGIITNPVNTTVAIAAEVLK.K	113
P24518	nadR	K.VAFIDTDFVTTQAFC*K.K	319
P24518	nadR	K.QQGC*TLQQVADASGMTK.G	16
P24398	spvC	R.LSENGVISGQC*PESDVHPENWK.Y	197
P22715	galE	K.AC*GKPINYHFAPR.R	280
P22714	galT	K.GAAMGC*SNPHPHGQVWANSFLPNEAEREDR.L	160
P22713	galK	K.DHALLIDC*R.T	191
P20751	fic	R.GLPHLC*AIHR.Q	60
P20751	fic	R.LAHYYC*EINVLHPFR.F	129
P20506	ilvA	R.LHELGYEC*HDESNNPAFR.F	499
P19816	rfaI	K.SNSPWSHC*ALLNPVTSHQLR.Y	296
P19265	eutC	R.SVMASM#GQDVPQPAAPSTQEGAKPQC*AAPTVTESCALDLGSAEAK.A	37
P19265	eutC	R.VATTVEADRTC*ISNIHQGGTPPVEAAAVIVDLAK.R	261
P19264	eutB	R.NNPVIAYEEDC*VTR.L	71
P19264	eutB	R.GAPGGLIFQSIC*GSEK.G	249
P19264	eutB	K.KANTTIGIPGTFSC*R.L	159
P17750	katG	R.ALAEVYAC*SDAHEK.F	699
P16657	fabI	K.MLAHC*EAVTPIR.R	210
P15434	pheT	R.LLDIVCGAPNC*R.Q	84
P15434	pheT	R.LLDIVC*GAPNCR.Q	79
P15434	pheT	R.RDIAVVVAENVPAADILSEC*KK.V	727
P15434	pheT	R.LGC*EVTEGQDEWK.A	435
P15434	pheT	R.DVAVLNKAPLQEPEMAPVTATISDTLPITVEAADAC*PR.Y	213
P15111	gdhA	-.M#DQTC*SLESFLNHVQK.R	5
P14845	carA	K.GAQNGC*IIAGDSPDAK.L	131
P14062	gnd	K.IAAVAEDGEPC*VTYIGADGAGHYVK.M	169
P12680	pabB	R.AQETTVC*TAR.T	68
P10503	putA	R.GAMAEC*R.M	944
P10503	putA	K.VADGKLNRPC*R.I	537
P10503	putA	R.KVYTDVSYLAC*AK.K	469
P10503	putA	K.RC*PLVIDYLVDLASR.S	410
P10503	putA	R.TVC*EAVAAR.E	1269
P10369	hisC	R.DQNKQPSLSGC*LR.I	336
P10369	hisC	K.VIAPYPLSTPVADIAAQALC*PQGINAM#R.D	261
P10368	hisB	R.FGFVLPMDEC*LAR.C	265
P10367	hisI	K.GETSGHVLNVVSIAPDCDNDTLLVLANPVGPTC*HK.G	97
P10367	hisI	K.GETSGHVLNVVSIAPDC*DNDTLLVLANPVGPTCHK.G	81
P0CL51	argS	K.DGGYLYTTTDIAC*AK.Y	320
P0CL51	argS	K.VSQAM#IAAGAPADC*EPQVR.Q	24
P0CL50	otsB	K.C*VVEIKPK.G	164
P0CL45	orgB	K.HHLDELPQDC*R.T	201
P0CL44	orgA	R.RLPQVAYLLGC*HK.L	91
P0CL43	invH	K.NSAISSSIFC*EK.Y	85
P0CL43	invH	K.EQLANANSIDEC*QSLPYVPSDLAK.N	48
P0CL13	igaA	K.SALREIHC*LR.G	259
P0CL07	hemL	R.VALAGAQDYYGVVPDLTC*LGK.I	262
P0CL07	hemL	K.HTLTC*TYNDLTSVR.A	179
P0CL02	csiD	K.ILDDLC*GNQLQPLLIK.T	75
P0A9X6	mreB	R.LLMEETGIPVVVAEDPLTC*VAR.G	324
P0A9X6	mreB	R.VLVC*VPVGATQVER.R	113
P0A8B8	ybaB	K.VTINGAHNC*R.R	52
P0A7Z7	rpoA	R.RILLSSMPGC*AVTEVEIDGVLHEYSTK.E	54
P0A7Z7	rpoA	R.SANC*LK.A	269
P0A7Z7	rpoA	R.LLVDAC*YSPVER.I	176
P0A7Z7	rpoA	K.SGIGPVTAADITHDGDVEIVKPQHVIC*HLTDENASISMR.I	131
P0A7S6	rpsL	K.SNVPALEAC*PQKRGVCTR.V	27
P0A7S6	rpsL	R.GALDC*SGVKDRK.Q	104
P0A2T6	crp	R.AKTAC*EVAEISYKK.F	93
P0A2T6	crp	R.QEIGQIVGC*SRETVGR.I	179
P0A2S0	lrp	K.RVGLSPTPC*LER.V	45
P0A2S0	lrp	R.GAPDVFEQFNAAVQKLEEIQEC*HLVSGDFDYLLK.T	106
P0A2R4	rpoC	R.SVVSC*DTDFGVCAHCYGR.D	888
P0A2R4	rpoC	R.LVDVAQDLVVTEDDC*GTHEGILMTPVIEGGDVKEPLRDR.V	814
P0A2R4	rpoC	R.IFGPVKDYEC*LCGK.Y	70
P0A2R4	rpoC	R.LHQC*GLPK.K	366
P0A2Q2	ilvY	R.SDEKTPFELGVC*AQK.K	275
P0A2P0	rhlB	R.GLHIPAVTHVFNYDLPDDC*EDYVHR.I	337
P0A2P0	rhlB	K.KGFYNC*TPIQALALPLTLAGR.D	32
P0A2P0	rhlB	K.HRC*EDIWGHLAADGHR.V	269
P0A2M5	upp	K.AGC*SSIK.V	151
P0A2L3	corC	R.NQTLDEC*LDVIIESAHSR.F	91
P0A2K7	galF	R.QLLAEVQSIC*PPGVTIMNVR.Q	93
P0A2K7	galF	K.KQSVDAMLMTGDSYDC*GK.K	263
P0A2K3	gltX	R.HSHEHHADDEPC*VVR.F	138
P0A2K3	gltX	R.C*RHSHEHHADDEPCVVR.F	125
P0A2I5	parE	K.LADC*TAQDLNR.T	404
P0A2I5	parE	K.VQDLQVVGTC*GKR.N	156
P0A2I3	gyrB	R.KGALDLAGLPGKLADC*QERDPALSELYLVEGDSAGGSAK.Q	410
P0A2I1	topA	R.NGEVAPPKEDPVPLPELPC*EKSDAYFVLR.D	763
P0A2H7	fadA	R.LC*GSSMQALHDAAR.M	91
P0A2G9	cbiF	R.C*VWFVGAGPGDRELITLK.G	9
P0A2G1	smpB	K.DGEAWLFGANFTPMAVASTHVVC*DPTR.T	82
P0A2E3	rpoD	K.LCVEQC*K.M	297
P0A2E1	glyA	K.RYYGGC*EYVDVVEQLAIDR.A	68
P0A2D7	tyrR	R.SAKPYLALNC*ASIPEDAVESELFGHAPEGK.K	263
P0A2D7	tyrR	K.SKVEMANPASC*QLFAQSQER.M	110
P0A2D1	ucpA	R.AKETEGRIDILVNNAGVC*R.L	93
P0A2D1	ucpA	R.VNAIC*PGYVR.T	184
P0A2C3	rph	K.VLC*TASIEEGVPR.F	39
P0A2A5	rpmB	R.VC*QVTGK.R	5
P0A297	rplJ	R.RVVEGTQFEC*LKDTFVGPTLIAYSMEHPGAAAR.L	71
P0A289	prfB	R.ITHIPTGIVTQC*QNDR.S	274
P0A287	prfA	R.ITHLPTGIVVEC*QDER.S	257
P0A277	gpt	R.HVDTVC*ISSYDHDNQR.E	59
P0A265	ppiC	R.QGQM#VPAFDKVVFSC*PVLEPTGPLHTQFGYHIIK.V	69
P0A265	ppiC	K.KHSIC*PSGK.K	41
P0A251	ahpC	K.AAQYVAAHPGEVC*PAKWK.E	166
P0A249	ptsI	K.WTGMC*GELAGDER.A	502
P0A249	ptsI	K.AVAEAC*GSQAVIVR.T	324
P0A249	ptsI	K.LKDLPAITLDGHQVEVC*ANIGTVRDVEGAER.N	272
P0A1Y8	nuoE	R.FTLLPTC*CLGNCDKGPNMMIDEDTHSHLTPEAIPELLER.Y	132
P0A1Y6	nuoC	R.ILQQC*LDNMPEGPFKADHPLTTPPPK.E	480
P0A1Y6	nuoC	K.WRPYSGYENFDFEVPVGGGVSDC*YTR.V	459
P0A1Y6	nuoC	R.IILQLDGEEIVDC*VPDIGYHHR.G	241
P0A1Y4	nuoG	R.KWDMQFAPSICQQCSIGC*NISPGER.Y	235
P0A1Y4	nuoG	K.WDMQFAPSICQQC*SIGCNISPGER.Y	231
P0A1Y4	nuoG	R.KWDMQFAPSIC*QQCSIGCNISPGER.Y	228
P0A1Y4	nuoG	R.ESVVEWLMTNHPHDCPVCEEGGNC*HLQDMTVMTGHSFR.R	112
P0A1Y4	nuoG	R.ESVVEWLMTNHPHDCPVC*EEGGNCHLQDMTVMTGHSFR.R	106
P0A1Y4	nuoG	R.ESVVEWLMTNHPHDC*PVCEEGGNCHLQDM#TVMTGHSFR.R	103
P0A1X6	map	R.EYC*GHGIGR.G	169
P0A1V4	adk	R.IAQEDC*R.N	77
P0A1U4	yjaG	R.MYPNYAMFC*K.Q	37
P0A1U4	yjaG	R.LLADC*EER.D	167
P0A1T2	yceD	R.C*GKPFTHQVHTTYCFSPVR.S	76
P0A1S6	yaeQ	K.KAC*TQASDVALFAYNSR.A	96
P0A1S2	hns	R.EC*TLETLEEMLEK.L	21
P0A1R4	hisH	-.MNVVILDTGC*ANLSSVK.S	10
P0A1R2	hisF	R.VAEVIDIPFC*VAGGIR.S	78
P0A1P4	rfbJ	R.LEHVYGPGDGENKFIPYIIDC*LNKK.Q	181
P0A1P2	gpsA	K.ELAAGLPTAISLASTDETFADDLQQLLHC*GK.S	173
P0A1P0	gapA	K.GANFDKYEGQDIVSNASCTTNC*LAPLAK.V	154
P0A1P0	gapA	K.YEGQDIVSNASC*TTNCLAPLAK.V	150
P0A1N0	spaK	R.AYEILM#TIMEGC*HFAR.G	81
P0A1I1	phsB	R.VSCQHC*ENAPCVSVCPTGASYRDENGIVQVDK.S	67
P0A1I1	phsB	R.YLNPQTGVADKC*NFCADTR.L	123
P0A1H9	fabZ	K.VVCEATMMC*AR.S	145
P0A1H5	tufA	R.HYAHVDC*PGHADYVKNMITGAAQMDGAILVVAATDGPMPQTR.E	82
P0A1H5	tufA	K.VGEEVEIVGIKETQKSTC*TGVEM#FRK.L	256
P0A1H3	fusA	K.DVTTGDTLC*DPENPIILER.M	398
P0A1H3	fusA	R.VLNNEIILVTC*GSAFK.N	266
P0A1H3	fusA	R.VLDGAVMVYC*AVGGVQPQSETVWR.Q	114
P0A1F8	asd	K.ILNTASVIPVDGLC*VR.V	266
P0A1F2	dapF	R.IFNADGSEVSQC*GNGAR.C	73
P0A1F0	ddlA	R.AIAIQAYQTLGC*AGM#AR.V	295
P0A1F0	ddlA	R.VANLPFVGSDVLSSAAC*MDKDVAKR.L	138
P0A1D3	groL	R.QIVLNC*GEEPSVVANTVK.G	458
P0A1D3	groL	K.AVAAAVEELKALSVPC*SDSK.A	138
P0A1B3	argR	K.MEM#VYC*LPAELGVPTTSSPLK.N	68
P0A1A9	xthA	R.IDLLLASAPLAERC*AETGIDYDIR.S	241
P0A1A9	xthA	R.TGKC*SFLPEEREWMSR.L	177
P0A1A5	ilvE	R.C*YDSHKGPVVFR.H	42
P0A1A5	ilvE	R.C*GPVTKR.I	278
P0A1A3	alr	R.ADEPEC*GATEHQLDIFNAFCQGKPGQR.S	168
P0A1A1	yciA	R.VEGMTFLRPVAVGDVVCC*YAR.C	76
P0A1A1	yciA	R.VEGMTFLRPVAVGDVVC*CYAR.C	75
P0A195	uvrA	K.TADWIVDLGPEGGSGGGEILVAGTPETVAEC*EASHTAR.F	927
P08870	pyrE	K.GIPIATTTAVALAEHHDKDLPYC*FNRK.E	96
P08870	pyrE	R.GRGEISAIQEVERDYGC*K.V	176
P08421	pyrI	K.LQVEAIKC*GTVIDHIPAQVGFK.L	14
P08421	pyrI	R.INNVLVCPNSNC*ISHAEPVSSSFAVK.K	114
P08421	pyrI	R.INNVLVC*PNSNCISHAEPVSSSFAVK.K	109
P08007	oppF	R.LYEGETLGVVGESGC*GK.S	61
P08007	oppF	K.KIQLLEGELPSPINPPSGC*VFR.T	298
P08007	oppF	K.VGLLPNLINRYPHEFSGGQC*QR.I	170
P07691	pyrF	R.LTQQCGLDGVVC*SAQEAVR.F	168
P07637	aroA	R.ALLLAALAC*GK.T	36
P06204	pyrC	R.NDMLVGGIRPHLYC*LPILK.R	222
P06173	rpoB	R.LGEPVFDVQEC*QIR.G	85
P05989	ilvC	K.KVVIVGC*GAQGLNQGLNMR.D	45
P05416	glgA	-.MQVLHVC*SEMFPLLK.T	7
P05415	glgC	R.IIDFALSNC*LNSGIRR.I	61
P05415	glgC	R.EGMAYAHPFPLSC*VQSDPQAEPYWR.D	263
P05415	glgC	R.C*TVACMPVPIKEATAFGVMAVDESDKIIDFVEKPANPPAMPGDASK.S	163
P04787	leuD1	R.ENFGC*GSSR.E	82
P02936	ompA	R.GM#GESNPVTGNTC*DNVKPR.A	315
P00499	hisG	R.SKAC*LIQR.D	194
P00499	hisG	R.AGLADAIC*DLVSTGATLEANGLR.E	168
P00499	hisG	K.SC*LLNGSVEVAPR.A	149
P00499	hisG	R.RLDFGGC*R.L	104
O85140	fabD	K.ITFSAPTVPVVNNVDVKC*ETDAAAIRDALVR.Q	236
O85140	fabD	R.ALPLPVSVPSHC*ALM#KPAADKLAVELAK.I	202
O85140	fabD	R.GKFMQEAVPEGTGGMSAIIGLDDASIAKAC*EESAEGQVVSPVNFNSPGQVVIAGHK.E	147
O85139	fabH	R.HGNTSAASVPC*ALDEAVR.D	282
O84947	sseC	R.VNSTFGDGNAAC*LLSGK.I	51
O68901	sodC	K.ALPPGEHGFHIHANGSC*QPAIK.D	74
O68883	gltA	K.GVFTFDPGFTSTASC*ESK.I	53
O68883	gltA	R.ETC*HEVLKELGTKDDLLEVAMELEHIALNDPYFIEKK.L	323
O68883	gltA	R.TAGSSGANPFAC*IAAGIASLWGPAHGGANEAALK.M	252
O68883	gltA	R.NDLSYAGNFLNMM#FSTPC*ETYEVNPVLER.A	207
O68883	gltA	K.MPTMAAMC*YK.Y	176
O68883	gltA	R.DSHPM#AVMC*GITGALAAFYHDSLDVNNPR.H	136
O68838	gshA	R.KPGLTLGIGC*ETAQFPLPK.V	395
O68838	gshA	K.TDC*GM#YYLPYATSLR.L	223
O68838	gshA	K.C*GVTEGEAAK.E	164
O54453	trpH	R.QHHLWASLGSDFHQPC*PWIELGR.K	264
O54297	rpsD	R.AIDTKC*K.I	32
O54296	rpsK	R.C*ADAVKEYGIK.N	70
O54296	rpsK	R.ITNITDVTPIPHNGC*RPPK.K	121
O52765	hisS	R.AIGEVTDVVEKEMYTFEDRNGDSLTLRPEGTAGC*VR.A	88
O52765	hisS	R.TVFEWVTNSLGSQGTVC*AGGRYDGLVEQLGGR.A	283
O52765	hisS	R.VLDSKNPDVQALLNDAPALGDYLDDDSREHFAGLC*K.L	241
O52765	hisS	R.ANYRDALVAFLEQHQETLDEDC*KR.R	196
O52325	arnA	R.VVFPSTSEVYGMC*TDASFDEDKSNLIVGPVNKPR.W	439
O52325	arnA	K.C*GDIPSVPQR.E	182
O52324	arnC	R.TTTAC*ESLGK.A	34
O52324	arnC	K.AMGDYGC*MLR.A	161
O33799	hpt	K.SLAIC*TLLDKPSRR.E	126
O30916	sopB	R.LAM#LAHEIDAVPAWNC*K.S	460
O30916	sopB	K.DIFPSAYEGKGVC*SWDTK.N	213
O30911	hslU	R.DLLPLVEGC*TVSTK.H	288
O30911	hslU	K.LVNPEELKQDAIDAVEQHGIVFIDEIDKIC*KRGETSGPDVSR.E	262
H9L4B2	uvrY	K.VVGEACC*GEDAVK.W	35
H9L4B2	uvrY	K.VVGEAC*CGEDAVK.W	34
H9L4B1	orf319	R.LIQTTC*GDIR.M	65
H9L4A3	lpxO	K.WYSDAHPSAETLC*PITTK.L	125
H9L495	ssaC	K.AVEVSGVPSC*LTR.I	152
H9L492	STM2405	R.LAGC*GIGHLFGVPGDYNLQFLDHVIDHPTLR.W	18
H9L478	pduJ	K.SC*HVIPRPHSDVEAILPK.S	73
H9L462	STM1731	K.SDPTVDPLTGAELGC*GEPKEDK.-	285
H9L449	rfaQ	R.GC*ETKPVTGLAGK.T	227
H9L446	sseE	R.GIFVHHPQLTC*LK.M	85
H9L427	typA	R.SNDLTVNC*LTGK.K	537
B5EYP4	fghA	R.C*FGGWQQR.W	9
B4SVL3	bioH	R.VQALVTVASSPC*FSAR.E	110
A9N5J5	ycfP	R.IGFLC*DIR.Q	81
A9N5J5	ycfP	R.C*LVILSR.H	127
A9N5J5	ycfP	R.QVVFNPNLFPYENMEGKIDRPEEYADIATKC*VTNFR.E	115
