# Supplementary material for: Chemoproteomic profiling of itaconations in Salmonella
Source: Royal Society of Chemistry journal article supplement (doi:10.1039/d1sc00660f), 2021-01-01
Supplement: d1sc00660f4.xlsx [file d1sc00660f4.xlsx]

## Sheet: Sheet1
Uniprot id	Description	Gene Symbol	Competitive Ratio	Enrichment Ratio	Itaconation Sites Identified
P51066	aceA Isocitrate lyase	aceA	15	15	43	195	245	288	318					P51066	aceA Isocitrate lyase	aceA	15	15	15	15	15	15
Q8ZM59	STM3082 Putative zinc-binding dehydrogenase	STM3082	4.65163	14.03	NO									Q8ZM59	STM3082 Putative zinc-binding dehydrogenase	STM3082	15	15	11.11	15	14.03	14.03
Q8ZJV7	deoD Purine nucleoside phosphorylase DeoD-type	deoD	4.52637	15	92									Q8ZJV7	deoD Purine nucleoside phosphorylase DeoD-type	deoD	15	15	15	15	15	15
Q8ZKP9	lsrG (4S)-4-hydroxy-5-phosphonooxypentane-2,3-dione iso	lsrG	4.46654	15	74									Q8ZKP9	lsrG (4S)-4-hydroxy-5-phosphonooxypentane-2,3-dione iso	lsrG	15	15	15	15	15	15
P0A1F6	udp Uridine phosphorylase	udp	3.59289	13	NO									P0A1F6	udp Uridine phosphorylase	udp	15	15	10	12	13	13
Q8ZPZ0	icdA Isocitrate dehydrogenase [NADP]	icdA	3.39968	15	201	194	405							Q8ZPZ0	icdA Isocitrate dehydrogenase [NADP]	icdA	15	15	15	15	15	15
P65599	orn Oligoribonuclease	orn	3.849	15	105									P65599	orn Oligoribonuclease	orn	15	15	15	15	15	15
P0A1G5	dksA RNA polymerase-binding transcription factor DksA	dksA	3.71646	14.38	NO									P0A1G5	dksA RNA polymerase-binding transcription factor DksA	dksA	15	15	15	12.5	14.38	14.38
Q7CPA1	aspA Aspartate ammonia-lyase	aspA	3.34704	14.38	340	141								Q7CPA1	aspA Aspartate ammonia-lyase	aspA	15	15	12.5	15	14.38	14.38
Q7CPD4	pepQ Xaa-Pro dipeptidase	pepQ	3.31767	15	68	169								Q7CPD4	pepQ Xaa-Pro dipeptidase	pepQ	15	15	15	15	15	15
P65748	ppa Inorganic pyrophosphatase	ppa	3.19079	13.75	88									P65748	ppa Inorganic pyrophosphatase	ppa	15	15	10	15	13.75	13.75
P55900	serC Phosphoserine aminotransferase	serC	3.17231	15	72	27	114							P55900	serC Phosphoserine aminotransferase	serC	15	15	15	15	15	15
O85140	fabD Malonyl CoA-acyl carrier protein transacylase	fabD	3.079	15	236	147	202							O85140	fabD Malonyl CoA-acyl carrier protein transacylase	fabD	15	15	15	15	15	15
Q8ZQZ2	ybeL Putative cytoplasmic protein	ybeL	3.00781	15	145	142								Q8ZQZ2	ybeL Putative cytoplasmic protein	ybeL	15	15	15	15	15	15
Q7CPS3	ygiN Putative cytoplasmic protein	ygiN	2.93458	15	NO									Q7CPS3	ygiN Putative cytoplasmic protein	ygiN	15	15	15	15	15	15
Q8ZN45	sseA Sulfurtransferase	sseA	2.88206	15	NO									Q8ZN45	sseA Sulfurtransferase	sseA	15	15	15	15	15	15
Q7CPT2	STM3136 Putative D-mannonate oxidoreductase	STM3136	2.83516	15	NO									Q7CPT2	STM3136 Putative D-mannonate oxidoreductase	STM3136	15	15	15	15	15	15
Q7CQ13	fdx [2FE-2S] ferredoxin	fdx	2.82317	15	87	42								Q7CQ13	fdx [2FE-2S] ferredoxin	fdx	15	15	15	15	15	15
Q8ZQR4	pgl 6-phosphogluconolactonase	pgl	2.71796	15	129	214	152	246						Q8ZQR4	pgl 6-phosphogluconolactonase	pgl	15	15	15	15	15	15
Q7CQT1	STM1078 Putative cytoplasmic protein	STM1078	2.67955	14.03	126									Q7CQT1	STM1078 Putative cytoplasmic protein	STM1078	15	11.11	15	15	14.03	14.03
Q8ZR92	ybbN Putative thioredoxin protein	ybbN	2.56458	14.38	NO									Q8ZR92	ybbN Putative thioredoxin protein	ybbN	15	15	12.5	15	14.38	14.38
P74840	prpD 2-methylcitrate dehydratase	prpD	2.56369	15	347	385	157							P74840	prpD 2-methylcitrate dehydratase	prpD	15	15	15	15	15	15
P67179	yebC Probable transcriptional regulatory protein YebC	yebC	2.53925	15	120									P67179	yebC Probable transcriptional regulatory protein YebC	yebC	15	15	15	15	15	15
P63923	deoB Phosphopentomutase	deoB	2.53685	14.03	145	267								P63923	deoB Phosphopentomutase	deoB	15	15	11.11	15	14.03	14.03
Q8ZRT2	aceE Pyruvate dehydrogenase E1 component	aceE	2.52904	14.03	612	772	656							Q8ZRT2	aceE Pyruvate dehydrogenase E1 component	aceE	15	15	11.11	15	14.03	14.03
Q7CPH3	yicC Putative stress-induced protein	yicC	2.49854	12.78	NO									Q7CPH3	yicC Putative stress-induced protein	yicC	12.5	11.11	15	12.5	12.78	12.78
Q7CPQ5	yhbO Putative intracellular proteinase	yhbO	2.48634	14.38	104									Q7CPQ5	yhbO Putative intracellular proteinase	yhbO	15	15	15	12.5	14.38	14.38
Q8ZQY4	rihA Pyrimidine-specific ribonucleoside hydrolase RihA	rihA	2.41856	15	NO									Q8ZQY4	rihA Pyrimidine-specific ribonucleoside hydrolase RihA	rihA	15	15	15	15	15	15
P67617	yggX Probable Fe(2+)-trafficking protein	yggX	2.39687	15	7									P67617	yggX Probable Fe(2+)-trafficking protein	yggX	15	15	15	15	15	15
P06196	ushA Silent protein UshA(0)	ushA	2.39032	14.38	258									P06196	ushA Silent protein UshA(0)	ushA	12.5	15	15	15	14.38	14.38
Q8ZRX8	dapB 4-hydroxy-tetrahydrodipicolinate reductase	dapB	2.34691	15	189									Q8ZRX8	dapB 4-hydroxy-tetrahydrodipicolinate reductase	dapB	15	15	15	15	15	15
Q8ZKW8	atpG ATP synthase gamma chain	atpG	2.32686	15	113									Q8ZKW8	atpG ATP synthase gamma chain	atpG	15	15	15	15	15	15
P0A1H3	fusA Elongation factor G	fusA	2.32363	15	114									P0A1H3	fusA Elongation factor G	fusA	15	15	15	15	15	15
Q7CPE1	atpA ATP synthase subunit alpha	atpA	2.31591	15	47									Q7CPE1	atpA ATP synthase subunit alpha	atpA	15	15	15	15	15	15
P05989	ilvC Ketol-acid reductoisomerase (NADP(+))	ilvC	2.31128	15	45									P05989	ilvC Ketol-acid reductoisomerase (NADP(+))	ilvC	15	15	15	15	15	15
Q8ZKX9	yieF Putative oxidoreductase	yieF	2.29892	15	132									Q8ZKX9	yieF Putative oxidoreductase	yieF	15	15	15	15	15	15
Q8ZKI4	pgi Glucose-6-phosphate isomerase	pgi	2.29342	15	401									Q8ZKI4	pgi Glucose-6-phosphate isomerase	pgi	15	15	15	15	15	15
Q7CPL0	STM3461 Putative cytoplasmic protein	STM3461	2.2846	14.38	102									Q7CPL0	STM3461 Putative cytoplasmic protein	STM3461	15	12.5	15	15	14.38	14.38
Q8ZM78	bglA 6-phospho-beta-glucosidase A	bglA	2.27667	15	NO									Q8ZM78	bglA 6-phospho-beta-glucosidase A	bglA	15	15	15	15	15	15
Q8ZL56	gpmI 2,3-bisphosphoglycerate-independent phosphoglycera	gpmI	2.26608	12.78	NO									Q8ZL56	gpmI 2,3-bisphosphoglycerate-independent phosphoglycera	gpmI	15	15	10	11.11	12.78	12.78
P0A6B1	acpP Acyl carrier protein	acpP	2.25244	15	NO									P0A6B1	acpP Acyl carrier protein	acpP	15	15	15	15	15	15
Q8ZPI8	ydfI Putative mannitol dehydrogenase	ydfI	2.24432	15	NO									Q8ZPI8	ydfI Putative mannitol dehydrogenase	ydfI	15	15	15	15	15	15
Q8ZJV8	deoC Deoxyribose-phosphate aldolase	deoC	2.21952	15	47									Q8ZJV8	deoC Deoxyribose-phosphate aldolase	deoC	15	15	15	15	15	15
P64076	eno Enolase	eno	2.20266	14.38	247									P64076	eno Enolase	eno	12.5	15	15	15	14.38	14.38
Q8ZK35	arcB Ornithine carbamoyltransferase, catabolic	arcB	2.15431	15	NO									Q8ZK35	arcB Ornithine carbamoyltransferase, catabolic	arcB	15	15	15	15	15	15
Q8ZQ11	ycfH Putative metal-dependent hydrolase	ycfH	2.1495	15	64	37								Q8ZQ11	ycfH Putative metal-dependent hydrolase	ycfH	15	15	15	15	15	15
Q8ZR68	cysS Cysteine--tRNA ligase	cysS	2.13811	15	NO									Q8ZR68	cysS Cysteine--tRNA ligase	cysS	15	15	15	15	15	15
Q8ZQB3	ycbL Putative metallo-beta-lactamase	ycbL	2.12669	12.5	NO									Q8ZQB3	ycbL Putative metallo-beta-lactamase	ycbL	15	15	5	15	12.5	12.5
P0A1S2	hns DNA-binding protein H-NS	hns	2.12496	15	21									P0A1S2	hns DNA-binding protein H-NS	hns	15	15	15	15	15	15
P37449	pduB Propanediol utilization protein PduB	pduB	2.10642	15	150									P37449	pduB Propanediol utilization protein PduB	pduB	15	15	15	15	15	15
P00499	hisG ATP phosphoribosyltransferase	hisG	2.08224	15	168	194	149	104						P00499	hisG ATP phosphoribosyltransferase	hisG	15	15	15	15	15	15
Q8ZQX8	nagA N-acetylglucosamine-6-phosphate deacetylase	nagA	2.06721	15	92									Q8ZQX8	nagA N-acetylglucosamine-6-phosphate deacetylase	nagA	15	15	15	15	15	15
P0A1A5	ilvE Branched-chain-amino-acid aminotransferase	ilvE	2.06708	15	278	42								P0A1A5	ilvE Branched-chain-amino-acid aminotransferase	ilvE	15	15	15	15	15	15
P22714	galT Galactose-1-phosphate uridylyltransferase	galT	2.06087	15	160									P22714	galT Galactose-1-phosphate uridylyltransferase	galT	15	15	15	15	15	15
Q8ZM63	tktA Transketolase	tktA	2.03991	15	494	243								Q8ZM63	tktA Transketolase	tktA	15	15	15	15	15	15
P41033	pckA Phosphoenolpyruvate carboxykinase (ATP)	pckA	2.02714	15	232	174	124							P41033	pckA Phosphoenolpyruvate carboxykinase (ATP)	pckA	15	15	15	15	15	15
Q8ZKL4	aceB Malate synthase	aceB	2.02404	15	409	165								Q8ZKL4	aceB Malate synthase	aceB	15	15	15	15	15	15
O68901	sodC Superoxide dismutase [Cu-Zn] 2	sodC	2.02363	14.25	74									O68901	sodC Superoxide dismutase [Cu-Zn] 2	sodC	12	15	15	15	14.25	14.25
P0A1E3	cysK Cysteine synthase A	cysK	2.00969	13.4	NO									P0A1E3	cysK Cysteine synthase A	cysK	12.5	11.11	15	15	13.4	13.4
Q8ZRM2	gloB Hydroxyacylglutathione hydrolase	gloB	1.99878	15	162	134								Q8ZRM2	gloB Hydroxyacylglutathione hydrolase	gloB	15	15	15	15	15	15
Q8ZLM9	yrdD Putative DNA topoisomerase	yrdD	1.97756	15	168	173	106							Q8ZLM9	yrdD Putative DNA topoisomerase	yrdD	15	15	15	15	15	15
Q8ZQ76	pepN Aminopeptidase N	pepN	1.97217	15	418									Q8ZQ76	pepN Aminopeptidase N	pepN	15	15	15	15	15	15
Q8ZNS0	amn AMP nucleosidase	amn	1.96571	15	82									Q8ZNS0	amn AMP nucleosidase	amn	15	15	15	15	15	15
P25081	manA Mannose-6-phosphate isomerase	manA	1.96032	14.03	89									P25081	manA Mannose-6-phosphate isomerase	manA	15	15	11.11	15	14.03	14.03
Q8ZMK0	srlD Glucitol (Sorbitol)-6-phosphate dehydrogenase	srlD	1.95707	15	NO									Q8ZMK0	srlD Glucitol (Sorbitol)-6-phosphate dehydrogenase	srlD	15	15	15	15	15	15
Q8ZQW9	pgm Phosphoglucomutase	pgm	1.9366	14.03	285	81	281							Q8ZQW9	pgm Phosphoglucomutase	pgm	15	15	11.11	15	14.03	14.03
Q7CQ41	accD Acetyl-coenzyme A carboxylase carboxyl transferase	accD	1.93554	15	46	158	154							Q7CQ41	accD Acetyl-coenzyme A carboxylase carboxyl transferase	accD	15	15	15	15	15	15
Q7CPE2	atpD ATP synthase subunit beta	atpD	1.92718	11.78	138									Q7CPE2	atpD ATP synthase subunit beta	atpD	10	11.11	12	14	11.78	11.78
Q8ZNM0	cdd Cytidine deaminase	cdd	1.91766	14.38	129	63	217							Q8ZNM0	cdd Cytidine deaminase	cdd	15	12.5	15	15	14.38	14.38
Q8ZPB1	STM1624 Putative cytoplasmic protein	STM1624	1.91594	15	242									Q8ZPB1	STM1624 Putative cytoplasmic protein	STM1624	15	15	15	15	15	15
P26311	pepT Peptidase T	pepT	1.91482	14.38	NO									P26311	pepT Peptidase T	pepT	12.5	15	15	15	14.38	14.38
Q7CQK9	ydhD Glutaredoxin	ydhD	1.90822	15	30	43								Q7CQK9	ydhD Glutaredoxin	ydhD	15	15	15	15	15	15
Q8ZP84	uspE Universal stress protein E	uspE	1.88982	15	138									Q8ZP84	uspE Universal stress protein E	uspE	15	15	15	15	15	15
Q8ZLK4	rpe Ribulose-phosphate 3-epimerase	rpe	1.88602	13	NO									Q8ZLK4	rpe Ribulose-phosphate 3-epimerase	rpe	15	15	12	10	13	13
Q8XFG8	ppiB Peptidyl-prolyl cis-trans isomerase	ppiB	1.88334	13.06	31									Q8XFG8	ppiB Peptidyl-prolyl cis-trans isomerase	ppiB	11.11	11.11	15	15	13.06	13.06
Q7CQR9	ycdX Probable phosphatase YcdX	ycdX	1.87631	14.38	NO									Q7CQR9	ycdX Probable phosphatase YcdX	ycdX	15	12.5	15	15	14.38	14.38
P0A2L1	yjbQ UPF0047 protein YjbQ	yjbQ	1.87001	15	NO									P0A2L1	yjbQ UPF0047 protein YjbQ	yjbQ	15	15	15	15	15	15
O68446	purR HTH-type transcriptional repressor PurR	purR	1.86323	13.13	NO									O68446	purR HTH-type transcriptional repressor PurR	purR	15	10	15	12.5	13.13	13.13
Q8ZRS3	speE Polyamine aminopropyltransferase	speE	1.86292	15	NO									Q8ZRS3	speE Polyamine aminopropyltransferase	speE	15	15	15	15	15	15
Q8ZLA1	ghrB Glyoxylate/hydroxypyruvate reductase B	ghrB	1.83576	15	NO									Q8ZLA1	ghrB Glyoxylate/hydroxypyruvate reductase B	ghrB	15	15	15	15	15	15
Q8ZLW8	yqjG Putative glutathione S-transferase	yqjG	1.83483	14.38	259									Q8ZLW8	yqjG Putative glutathione S-transferase	yqjG	15	15	12.5	15	14.38	14.38
P26394	rfbC dTDP-4-dehydrorhamnose 3,5-epimerase	rfbC	1.82014	15	77									P26394	rfbC dTDP-4-dehydrorhamnose 3,5-epimerase	rfbC	15	15	15	15	15	15
P0A7Z7	rpoA DNA-directed RNA polymerase subunit alpha	rpoA	1.81289	15	54	131	269	176						P0A7Z7	rpoA DNA-directed RNA polymerase subunit alpha	rpoA	15	15	15	15	15	15
Q8ZKV4	hemY Protein for a late step of protoheme IX synthesis	hemY	1.8121	13.25	NO									Q8ZKV4	hemY Protein for a late step of protoheme IX synthesis	hemY	15	10	15	13	13.25	13.25
Q9L6Q5	hemY 96% identity with E. coli hemY protein (HEMY) (SP:	hemY	1.8121	12.75	NO									Q9L6Q5	hemY 96% identity with E. coli hemY protein (HEMY) (SP:	hemY	15	10	12	14	12.75	12.75
Q8ZLG2	yhhX Putative oxidoreductase	yhhX	1.801	15	NO									Q8ZLG2	yhhX Putative oxidoreductase	yhhX	15	15	15	15	15	15
Q8ZPT5	pfkB Phosphofructokinase	pfkB	1.80066	15	163	295	30	238						Q8ZPT5	pfkB Phosphofructokinase	pfkB	15	15	15	15	15	15
Q8ZNT7	dcyD D-cysteine desulfhydrase	dcyD	1.79946	15	NO									Q8ZNT7	dcyD D-cysteine desulfhydrase	dcyD	15	15	15	15	15	15
Q7CQ01	clpB Chaperone protein ClpB	clpB	1.79711	14.38	310	615								Q7CQ01	clpB Chaperone protein ClpB	clpB	15	15	12.5	15	14.38	14.38
Q8ZRS1	gcd Glucose dehydrogenase	gcd	1.78061	15	286	265	664							Q8ZRS1	gcd Glucose dehydrogenase	gcd	15	15	15	15	15	15
Q7CQ11	nifU Iron-sulfur cluster assembly scaffold protein IscU	nifU	1.77919	15	37	106								Q7CQ11	nifU Iron-sulfur cluster assembly scaffold protein IscU	nifU	15	15	15	15	15	15
P0A1C3	accA Acetyl-coenzyme A carboxylase carboxyl transferase	accA	1.77809	13.75	NO									P0A1C3	accA Acetyl-coenzyme A carboxylase carboxyl transferase	accA	15	15	10	15	13.75	13.75
P0A2H9	dsbA Thiol:disulfide interchange protein DsbA	dsbA	1.77298	15	NO									P0A2H9	dsbA Thiol:disulfide interchange protein DsbA	dsbA	15	15	15	15	15	15
P63223	gmhA Phosphoheptose isomerase	gmhA	1.77185	13.4	NO									P63223	gmhA Phosphoheptose isomerase	gmhA	12.5	15	11.11	15	13.4	13.4
P0A1Y8	nuoE NADH-quinone oxidoreductase subunit E	nuoE	1.77012	15	132									P0A1Y8	nuoE NADH-quinone oxidoreductase subunit E	nuoE	15	15	15	15	15	15
Q7CQ05	grcA Autonomous glycyl radical cofactor	grcA	1.75547	14.38	NO									Q7CQ05	grcA Autonomous glycyl radical cofactor	grcA	15	12.5	15	15	14.38	14.38
Q7CQR2	yceH UPF0502 protein YceH	yceH	1.75273	15	86	38	168							Q7CQR2	yceH UPF0502 protein YceH	yceH	15	15	15	15	15	15
Q93IN1	bcsB Cyclic di-GMP-binding protein	bcsB	1.75215	15	NO									Q93IN1	bcsB Cyclic di-GMP-binding protein	bcsB	15	15	15	15	15	15
Q8ZRZ0	ileS Isoleucine--tRNA ligase	ileS	1.74861	15	750	927	463	126	97					Q8ZRZ0	ileS Isoleucine--tRNA ligase	ileS	15	15	15	15	15	15
Q8ZPV9	yeaD Putative glucose-6-phosphate 1-epimerase	yeaD	1.74709	15	290	80	217							Q8ZPV9	yeaD Putative glucose-6-phosphate 1-epimerase	yeaD	15	15	15	15	15	15
P56978	cyaY Iron-sulfur cluster assembly protein CyaY	cyaY	1.74209	15	NO									P56978	cyaY Iron-sulfur cluster assembly protein CyaY	cyaY	15	15	15	15	15	15
P65359	minC Septum site-determining protein MinC	minC	1.74196	15	81									P65359	minC Septum site-determining protein MinC	minC	15	15	15	15	15	15
P64052	tsf Elongation factor Ts	tsf	1.74179	12.5	NO									P64052	tsf Elongation factor Ts	tsf	15	15	10	10	12.5	12.5
Q8ZLQ9	yhcH Putative cytoplasmic protein	yhcH	1.7176	13.25	12									Q8ZLQ9	yhcH Putative cytoplasmic protein	yhcH	15	10	15	13	13.25	13.25
Q8ZPT7	yniC Putative enzyme	yniC	1.71733	15	104	157								Q8ZPT7	yniC Putative enzyme	yniC	15	15	15	15	15	15
P65226	thrB Homoserine kinase	thrB	1.71713	13.75	NO									P65226	thrB Homoserine kinase	thrB	15	15	15	10	13.75	13.75
Q8ZJY7	mrr Restriction of methylated adenine	mrr	1.71288	15	NO									Q8ZJY7	mrr Restriction of methylated adenine	mrr	15	15	15	15	15	15
Q7CQF3	tdk Thymidine kinase	tdk	1.70899	15	NO									Q7CQF3	tdk Thymidine kinase	tdk	15	15	15	15	15	15
Q8ZQX7	nagB Glucosamine-6-phosphate deaminase	nagB	1.70008	12.5	118	239								Q8ZQX7	nagB Glucosamine-6-phosphate deaminase	nagB	15	15	10	10	12.5	12.5
P0A2I1	topA DNA topoisomerase 1	topA	1.69565	15	763	602								P0A2I1	topA DNA topoisomerase 1	topA	15	15	15	15	15	15
Q8ZR71	purK N5-carboxyaminoimidazole ribonucleotide synthase	purK	1.68904	14.03	NO									Q8ZR71	purK N5-carboxyaminoimidazole ribonucleotide synthase	purK	15	11.11	15	15	14.03	14.03
Q8ZLK9	yhfA Putative inner membrane protein	yhfA	1.68232	14.03	66	113								Q8ZLK9	yhfA Putative inner membrane protein	yhfA	15	15	15	11.11	14.03	14.03
Q8ZKG0	STM4270 Putative LysR family transcriptional regulator	STM4270	1.67594	15	NO									Q8ZKG0	STM4270 Putative LysR family transcriptional regulator	STM4270	15	15	15	15	15	15
Q8ZP52	acnA Aconitate hydratase A	acnA	1.67427	12.15	180	863								Q8ZP52	acnA Aconitate hydratase A	acnA	11.11	12.5	12.5	12.5	12.15	12.15
P58661	aspC Aspartate aminotransferase	aspC	1.67231	13.5	NO									P58661	aspC Aspartate aminotransferase	aspC	10	15	15	14	13.5	13.5
P40861	proA Gamma-glutamyl phosphate reductase	proA	1.66409	15	253	346	209	166	133					P40861	proA Gamma-glutamyl phosphate reductase	proA	15	15	15	15	15	15
P64105	fabA 3-hydroxydecanoyl-[acyl-carrier-protein] dehydrata	fabA	1.66345	12.37										P64105	fabA 3-hydroxydecanoyl-[acyl-carrier-protein] dehydrata	fabA	10	11.11	13.4	15	12.37	12.37
Q8ZRA6	acrA Acridine efflux pump	acrA	1.66311	14.13	NO									Q8ZRA6	acrA Acridine efflux pump	acrA	12.5	15	14	15	14.13	14.13
Q8ZRD3	nusB Transcription antitermination protein NusB	nusB	1.66262	15	NO									Q8ZRD3	nusB Transcription antitermination protein NusB	nusB	15	15	15	15	15	15
P0A283	crr PTS system glucose-specific EIIA component	crr	1.66058	12.78	NO									P0A283	crr PTS system glucose-specific EIIA component	crr	10	15	11.11	15	12.78	12.78
Q7CPD3	yihD Putative cytoplasmic protein	yihD	1.65845	15	NO									Q7CPD3	yihD Putative cytoplasmic protein	yihD	15	15	15	15	15	15
P37419	kbl 2-amino-3-ketobutyrate coenzyme A ligase	kbl	1.64842	15	229	83								P37419	kbl 2-amino-3-ketobutyrate coenzyme A ligase	kbl	15	15	15	15	15	15
Q7CQ23	bcp Thioredoxin dependent thiol peroxidase	bcp	1.64829	15	51	46								Q7CQ23	bcp Thioredoxin dependent thiol peroxidase	bcp	15	15	15	15	15	15
Q8ZN68	yfgD Arsenate reductase	yfgD	1.63958	15	NO									Q8ZN68	yfgD Arsenate reductase	yfgD	15	15	15	15	15	15
Q7CPU6	fba Fructose-bisphosphate aldolase	fba	1.63878	14.38	112	37	158							Q7CPU6	fba Fructose-bisphosphate aldolase	fba	15	15	12.5	15	14.38	14.38
Q8ZK57	iolG Inositol 2-dehydrogenase	iolG	1.63713	12.53	NO									Q8ZK57	iolG Inositol 2-dehydrogenase	iolG	11.11	14	10	15	12.53	12.53
Q7CQP2	celA PTS family sugar specific enzyme IIB for cellobios	celA	1.63356	14.38	NO									Q7CQP2	celA PTS family sugar specific enzyme IIB for cellobios	celA	15	15	15	12.5	14.38	14.38
Q8ZN60	guaA GMP synthase [glutamine-hydrolyzing]	guaA	1.63122	15	NO									Q8ZN60	guaA GMP synthase [glutamine-hydrolyzing]	guaA	15	15	15	15	15	15
P10367	hisI Histidine biosynthesis bifunctional protein HisIE	hisI	1.62894	15	97	81								P10367	hisI Histidine biosynthesis bifunctional protein HisIE	hisI	15	15	15	15	15	15
Q7CQV7	ybiS Putative periplasmic protein	ybiS	1.62701	13.75	210									Q7CQV7	ybiS Putative periplasmic protein	ybiS	12.5	12.5	15	15	13.75	13.75
Q8ZLD7	uspA Universal stress protein A	uspA	1.6266	14.38	109									Q8ZLD7	uspA Universal stress protein A	uspA	12.5	15	15	15	14.38	14.38
P0CL43	invH Invasion lipoprotein invH	invH	1.62448	15	85	48								P0CL43	invH Invasion lipoprotein invH	invH	15	15	15	15	15	15
Q8ZL72	aldB Aldehyde dehydrogenase B	aldB	1.62151	15	499	307	190	54	464					Q8ZL72	aldB Aldehyde dehydrogenase B	aldB	15	15	15	15	15	15
Q8ZKB1	psd Phosphatidylserine decarboxylase proenzyme	psd	1.62116	15	NO									Q8ZKB1	psd Phosphatidylserine decarboxylase proenzyme	psd	15	15	15	15	15	15
P0A1P0	gapA Glyceraldehyde-3-phosphate dehydrogenase	gapA	1.61857	15	150	154								P0A1P0	gapA Glyceraldehyde-3-phosphate dehydrogenase	gapA	15	15	15	15	15	15
Q8ZM06	dkgA 2,5-diketo-D-gluconic acid reductase A	dkgA	1.61477	15	138									Q8ZM06	dkgA 2,5-diketo-D-gluconic acid reductase A	dkgA	15	15	15	15	15	15
P65363	minE Cell division topological specificity factor	minE	1.61354	13.4	51									P65363	minE Cell division topological specificity factor	minE	12.5	11.11	15	15	13.4	13.4
Q8ZL61	lldD L-lactate dehydrogenase	lldD	1.61241	13.75	NO									Q8ZL61	lldD L-lactate dehydrogenase	lldD	15	15	15	10	13.75	13.75
P67091	uspF Universal stress protein F	uspF	1.611	15	138									P67091	uspF Universal stress protein F	uspF	15	15	15	15	15	15
Q7CR64	yaeH UPF0325 protein YaeH	yaeH	1.6085	12.63	87									Q7CR64	yaeH UPF0325 protein YaeH	yaeH	12.5	13	10	15	12.63	12.63
P0A2R4	rpoC DNA-directed RNA polymerase subunit beta	rpoC	1.60836	15	814	366	888	70	895	898	88			P0A2R4	rpoC DNA-directed RNA polymerase subunit beta	rpoC	15	15	15	15	15	15
Q8ZLF5	ugpQ Cytosolic glycerophosphodiester phosphodiesterase	ugpQ	1.60737	15	185									Q8ZLF5	ugpQ Cytosolic glycerophosphodiester phosphodiesterase	ugpQ	15	15	15	15	15	15
P0A1Q2	gloA Lactoylglutathione lyase	gloA	1.60593	15	NO									P0A1Q2	gloA Lactoylglutathione lyase	gloA	15	15	15	15	15	15
Q8ZRS6	yacL UPF0231 protein YacL	yacL	1.6036	13.04	NO									Q8ZRS6	yacL UPF0231 protein YacL	yacL	7.14	15	15	15	13.04	13.04
P0AA19	ompR Transcriptional regulatory protein OmpR	ompR	1.60306	15	67									P0AA19	ompR Transcriptional regulatory protein OmpR	ompR	15	15	15	15	15	15
Q8ZNM1	STM2178 Putative 1,2-dioxygenase protein	STM2178	1.59732	12.81	NO									Q8ZNM1	STM2178 Putative 1,2-dioxygenase protein	STM2178	15	15	15	6.25	12.81	12.81
Q8ZKX0	glmU Bifunctional protein GlmU	glmU	1.59717	15	385									Q8ZKX0	glmU Bifunctional protein GlmU	glmU	15	15	15	15	15	15
H9L462	STM1731 Putative catalase	STM1731	1.59564	13.13	285	40								H9L462	STM1731 Putative catalase	STM1731	12.5	10	15	15	13.13	13.13
P65702	pgk Phosphoglycerate kinase	pgk	1.59439	15	133	249	162							P65702	pgk Phosphoglycerate kinase	pgk	15	15	15	15	15	15
Q8ZLD0	STM3601 Putative phosphosugar isomerase	STM3601	1.5931	15	172	29								Q8ZLD0	STM3601 Putative phosphosugar isomerase	STM3601	15	15	15	15	15	15
Q8ZPI7	ydeJ Putative competence-damaged protein	ydeJ	1.591	14.38	41	152								Q8ZPI7	ydeJ Putative competence-damaged protein	ydeJ	15	12.5	15	15	14.38	14.38
Q7CQT9	rpsA 30S ribosomal protein S1	rpsA	1.5889	15	349									Q7CQT9	rpsA 30S ribosomal protein S1	rpsA	15	15	15	15	15	15
Q8ZNP8	baeR Response regulator in two-component regulatory sys	baeR	1.58746	15	109									Q8ZNP8	baeR Response regulator in two-component regulatory sys	baeR	15	15	15	15	15	15
B5EZU5	SeAg_B4198 Dienelactone hydrolase	SeAg_B4198	1.58511	15	NO									B5EZU5	SeAg_B4198 Dienelactone hydrolase	SeAg_B4198	15	15	15	15	15	15
C0Q3D8	ysgA Putative hydrolase	ysgA	1.58511	15	NO									C0Q3D8	ysgA Putative hydrolase	ysgA	15	15	15	15	15	15
E8XJF6	dlhH Dienelactone hydrolase	dlhH	1.58511	15	NO									E8XJF6	dlhH Dienelactone hydrolase	dlhH	15	15	15	15	15	15
Q57HP1	dlhH Putative dienelactone hydrolase family	dlhH	1.58511	15	NO									Q57HP1	dlhH Putative dienelactone hydrolase family	dlhH	15	15	15	15	15	15
Q9L6M9	ysgA Putative carboxymethylenebutenolidase	ysgA	1.58511	15	NO									Q9L6M9	ysgA Putative carboxymethylenebutenolidase	ysgA	15	15	15	15	15	15
P0A1P8	grxA Glutaredoxin 1	grxA	1.58215	13.75	11	14								P0A1P8	grxA Glutaredoxin 1	grxA	15	10	15	15	13.75	13.75
P26978	purH Bifunctional purine biosynthesis protein PurH	purH	1.57951	15	117	367	292							P26978	purH Bifunctional purine biosynthesis protein PurH	purH	15	15	15	15	15	15
Q8ZR95	copA Copper-exporting P-type ATPase	copA	1.57635	14.03	NO									Q8ZR95	copA Copper-exporting P-type ATPase	copA	15	11.11	15	15	14.03	14.03
Q8ZQ30	ghrA Glyoxylate/hydroxypyruvate reductase A	ghrA	1.57287	15	164									Q8ZQ30	ghrA Glyoxylate/hydroxypyruvate reductase A	ghrA	15	15	15	15	15	15
P10368	hisB Histidine biosynthesis bifunctional protein HisB	hisB	1.57283	15	265	269								P10368	hisB Histidine biosynthesis bifunctional protein HisB	hisB	15	15	15	15	15	15
Q8ZK81	rpsR 30S ribosomal protein S18	rpsR	1.57061	15	NO									Q8ZK81	rpsR 30S ribosomal protein S18	rpsR	15	15	15	15	15	15
Q7CQI9	adhP Alcohol dehydrogenase	adhP	1.56946	15	34	145	33	92						Q7CQI9	adhP Alcohol dehydrogenase	adhP	15	15	15	15	15	15
Q8ZM07	yqhD Putative alcohol dehydrogenase	yqhD	1.56334	15	NO									Q8ZM07	yqhD Putative alcohol dehydrogenase	yqhD	15	15	15	15	15	15
P10370	hisD Histidinol dehydrogenase	hisD	1.5507	12.15	NO									P10370	hisD Histidinol dehydrogenase	hisD	12.5	11.11	10	15	12.15	12.15
P10369	hisC Histidinol-phosphate aminotransferase	hisC	1.54739	15	261	336	156	61	291					P10369	hisC Histidinol-phosphate aminotransferase	hisC	15	15	15	15	15	15
Q8ZL01	yidR Putative cytoplasmic protein	yidR	1.54408	12.71	240									Q8ZL01	yidR Putative cytoplasmic protein	yidR	12.5	15	15	8.33	12.71	12.71
Q8ZMD6	STM2963 Putative MFS superfamily D-glucarate permease	STM2963	1.54291	15	101									Q8ZMD6	STM2963 Putative MFS superfamily D-glucarate permease	STM2963	15	15	15	15	15	15
P66032	ribB 3,4-dihydroxy-2-butanone 4-phosphate synthase	ribB	1.54045	14.03	173									P66032	ribB 3,4-dihydroxy-2-butanone 4-phosphate synthase	ribB	11.11	15	15	15	14.03	14.03
Q8ZRE7	ppnP Pyrimidine/purine nucleoside phosphorylase	ppnP	1.53976	13.06	91									Q8ZRE7	ppnP Pyrimidine/purine nucleoside phosphorylase	ppnP	11.11	11.11	15	15	13.06	13.06
Q8ZQ69	lonH Endopeptidase La	lonH	1.53924	15	NO									Q8ZQ69	lonH Endopeptidase La	lonH	15	15	15	15	15	15
Q8ZKG5	STM4262 Putative ABC-type bacteriocin/lantibiotic exporter	STM4262	1.53891	15	502	581								Q8ZKG5	STM4262 Putative ABC-type bacteriocin/lantibiotic exporter	STM4262	15	15	15	15	15	15
Q7CR61	rcsF Outer membrane lipoprotein RcsF	rcsF	1.53669	14.38	NO									Q7CR61	rcsF Outer membrane lipoprotein RcsF	rcsF	15	12.5	15	15	14.38	14.38
Q8ZRF0	proC Pyrroline-5-carboxylate reductase	proC	1.53289	14.38	230	10								Q8ZRF0	proC Pyrroline-5-carboxylate reductase	proC	15	12.5	15	15	14.38	14.38
P0A265	ppiC Peptidyl-prolyl cis-trans isomerase C	ppiC	1.53274	15	41	69								P0A265	ppiC Peptidyl-prolyl cis-trans isomerase C	ppiC	15	15	15	15	15	15
Q8ZQU3	sdhA Succinate dehydrogenase flavoprotein subunit	sdhA	1.5295	15	303	257	33	466	555	89	353			Q8ZQU3	sdhA Succinate dehydrogenase flavoprotein subunit	sdhA	15	15	15	15	15	15
P74881	purL Phosphoribosylformylglycinamidine synthase	purL	1.52835	15	98	1001	1138							P74881	purL Phosphoribosylformylglycinamidine synthase	purL	15	15	15	15	15	15
P0A1V4	adk Adenylate kinase	adk	1.5281	15	77									P0A1V4	adk Adenylate kinase	adk	15	15	15	15	15	15
Q8ZQX6	nagE Sugar Specific PTS family, n-acetylglucosamine-spe	nagE	1.52699	15	412	431								Q8ZQX6	nagE Sugar Specific PTS family, n-acetylglucosamine-spe	nagE	15	15	15	15	15	15
Q9L4T0	luxS S-ribosylhomocysteine lyase	luxS	1.52546	15	128	41	83							Q9L4T0	luxS S-ribosylhomocysteine lyase	luxS	15	15	15	15	15	15
P58525	solA N-methyl-L-tryptophan oxidase	solA	1.52363	15	189									P58525	solA N-methyl-L-tryptophan oxidase	solA	15	15	15	15	15	15
P0CL02	csiD Protein CsiD	csiD	1.52199	15	75									P0CL02	csiD Protein CsiD	csiD	15	15	15	15	15	15
P37431	ubiG Ubiquinone biosynthesis O-methyltransferase	ubiG	1.51986	15	65	145								P37431	ubiG Ubiquinone biosynthesis O-methyltransferase	ubiG	15	15	15	15	15	15
Q8ZK20	yjgB Putative alcohol dehydrogenase	yjgB	1.51914	15	193	99	102	96	110					Q8ZK20	yjgB Putative alcohol dehydrogenase	yjgB	15	15	15	15	15	15
P08421	pyrI Aspartate carbamoyltransferase regulatory chain	pyrI	1.51816	15	14	109	114							P08421	pyrI Aspartate carbamoyltransferase regulatory chain	pyrI	15	15	15	15	15	15
Q8ZKC4	yjdC Putative merR family bacterial regulatory protein	yjdC	1.51769	14.38	98	89								Q8ZKC4	yjdC Putative merR family bacterial regulatory protein	yjdC	15	15	12.5	15	14.38	14.38
P14062	gnd 6-phosphogluconate dehydrogenase, decarboxylating	gnd	1.51266	10.26	169									P14062	gnd 6-phosphogluconate dehydrogenase, decarboxylating	gnd	9.09	11.11	8.33	12.5	10.26	10.26
P06173	rpoB DNA-directed RNA polymerase subunit beta	rpoB	1.51156	15	85									P06173	rpoB DNA-directed RNA polymerase subunit beta	rpoB	15	15	15	15	15	15
P0A2G9	cbiF Cobalt-precorrin-4 C(11)-methyltransferase	cbiF	1.50942	15	9									P0A2G9	cbiF Cobalt-precorrin-4 C(11)-methyltransferase	cbiF	15	15	15	15	15	15
Q56073	dnaK Chaperone protein DnaK	dnaK	1.50804	12.24	15									Q56073	dnaK Chaperone protein DnaK	dnaK	10.33	11.11	15	12.5	12.24	12.24
Q7CQX4	sucB Dihydrolipoyllysine-residue succinyltransferase co	sucB	1.50524	15	NO									Q7CQX4	sucB Dihydrolipoyllysine-residue succinyltransferase co	sucB	15	15	15	15	15	15
P0A277	gpt Xanthine phosphoribosyltransferase	gpt	1.50473	15	59									P0A277	gpt Xanthine phosphoribosyltransferase	gpt	15	15	15	15	15	15
Q8ZJX0	STM4549 Putative cytoplasmic protein	STM4549	1.50468	14.38	99									Q8ZJX0	STM4549 Putative cytoplasmic protein	STM4549	12.5	15	15	15	14.38	14.38
Q7CQV6	ybiV(1) Putative hydrolase of the HAD superfamily	ybiV(1)	1.50191	14.38	NO									Q7CQV6	ybiV(1) Putative hydrolase of the HAD superfamily	ybiV(1)	15	15	15	12.5	14.38	14.38
Q8ZJY1	STM4536 Putative PTS permease	STM4536	1.5003	15	NO									Q8ZJY1	STM4536 Putative PTS permease	STM4536	15	15	15	15	15	15
														Q8ZN53	rodZ Cytoskeleton protein RodZ	rodZ	15	10	15	15	13.75	#N/A
														Q7CPV3	rcnR Transcriptional repressor RcnR	rcnR	15	15	15	15	15	#N/A
														P0A2F2	cobB NAD-dependent protein deacylase	cobB	15	15	15	15	15	#N/A
														P0A1I1	phsB Thiosulfate reductase electron transfer subunit Ph	phsB	15	15	15	15	15	#N/A
														Q7CPI1	mtlA PTS family, mannitol-specific enzyme IIABC compone	mtlA	15	15	15	15	15	#N/A
